# Supplementary material
Source: MDPI journal article supplement (https://www.mdpi.com/2410-3888/8/2/107)
Supplement: s1 [file s1]

**Supplementary Table S1.** Detailed information of sequences used in phylogenetic tree construction

| Classification | Species               | Accession number   |
|----------------|-----------------------|--------------------|
| AQP0           | <i>Homo sapiens</i>   | ENSP00000257979    |
| AQP0           | <i>Mus musculus</i>   | ENSMUSP00000026455 |
| AQP0           | <i>Xenopus laevis</i> | JN0557             |
| Aqp0a          | <i>Danio rerio</i>    | ENSDARP00000054237 |
| Aqp0b          | <i>Danio rerio</i>    | ENSDARP00000005361 |
| AQP1           | <i>Homo sapiens</i>   | ENSP00000311165    |
| AQP1           | <i>Mus musculus</i>   | ENSMUSP00000004774 |
| AQP1           | <i>Xenopus laevis</i> | NP_001085391.1     |
| Aqp1aa         | <i>Danio rerio</i>    | ENSDARP00000036702 |
| Aqp1ab         | <i>Danio rerio</i>    | ENSDARP00000110131 |
| AQP2           | <i>Homo sapiens</i>   | ENSP00000199280    |
| AQP2           | <i>Mus musculus</i>   | ENSMUSP00000023752 |
| AQP3           | <i>Homo sapiens</i>   | ENSP00000297991    |
| AQP3           | <i>Mus musculus</i>   | ENSMUST00000055327 |
| AQP3           | <i>Xenopus laevis</i> | NP_001081876.1     |
| Aqp3a          | <i>Danio rerio</i>    | ENSDARP00000018463 |
| Aqp3b          | <i>Danio rerio</i>    | ENSDARP00000092015 |
| AQP4           | <i>Homo sapiens</i>   | ENSP00000372654    |
| AQP4           | <i>Mus musculus</i>   | ENSMUSP00000078088 |
| AQP4           | <i>Xenopus laevis</i> | NP_001124421.1     |
| Aqp4           | <i>Danio rerio</i>    | ENSDARP00000021578 |
| AQP5           | <i>Homo sapiens</i>   | ENSP00000293599    |
| AQP5           | <i>Mus musculus</i>   | ENSMUSP00000048739 |
| AQP5           | <i>Xenopus laevis</i> | NP_001079331.1     |
| AQP6           | <i>Homo sapiens</i>   | ENSP00000320247    |
| AQP6           | <i>Mus musculus</i>   | ENSMUSP00000023754 |
| AQP6ub         | <i>Xenopus laevis</i> | NP_001137369.1     |
| AQP7           | <i>Homo sapiens</i>   | ENSP00000456868    |
| AQP7           | <i>Mus musculus</i>   | ENSMUSP00000030136 |
| AQP8           | <i>Homo sapiens</i>   | ENSP00000219660    |
| AQP8           | <i>Mus musculus</i>   | ENSMUSP00000033023 |
| Aqp8aa         | <i>Danio rerio</i>    | ENSDARP00000066381 |
| Aqp8ab         | <i>Danio rerio</i>    | ENSDARP00000096730 |
| Aqp8bb-1       | <i>Danio rerio</i>    | ENSDARP00000005510 |
| Aqp8bb-2       | <i>Danio rerio</i>    | ENSDARP00000109513 |
| AQP9           | <i>Homo sapiens</i>   | ENSP00000219919    |
| AQP9           | <i>Mus musculus</i>   | ENSMUSP00000109200 |
| Aqp9a          | <i>Danio rerio</i>    | NP_001028268.1     |
| Aqp9b          | <i>Danio rerio</i>    | ENSDARP00000069995 |
| AQP10          | <i>Homo sapiens</i>   | ENSP00000318355    |
| Aqp10a         | <i>Danio rerio</i>    | ENSDARP00000012559 |
| Aqp10b         | <i>Danio rerio</i>    | ENSDARP00000121815 |

|        |                       |                    |
|--------|-----------------------|--------------------|
| AQP11  | <i>Homo sapiens</i>   | ENSP00000318770    |
| AQP11  | <i>Mus musculus</i>   | ENSMUSP00000082054 |
| Aqp11b | <i>Danio rerio</i>    | ENSDARP00000062519 |
| AQP11  | <i>Xenopus laevis</i> | AAI33223.1         |
| AQP12A | <i>Homo sapiens</i>   | ENSP00000337144    |
| AQP12B | <i>Homo sapiens</i>   | ENSP00000384894    |
| AQP12  | <i>Mus musculus</i>   | ENSMUSP00000060622 |
| AQP12  | <i>Xenopus laevis</i> | AAH82904.1         |
| Aqp12  | <i>Danio rerio</i>    | ENSDARP00000063532 |
| AQP13  | <i>Xenopus laevis</i> | NP_001082310.1     |
| Aqp14  | <i>Danio rerio</i>    | MK883754.1         |
| Aqp15  | <i>Danio rerio</i>    | ENSDARP00000055694 |
| AQP16  | <i>Xenopus laevis</i> | AAH99368.1         |
