# Supplementary material
Source: MDPI journal article supplement (https://www.mdpi.com/2410-3888/8/2/107)

**Supplementary Figure S3.** The front view (a) and top view (b) of Three-dimensional structure and high Fst value amino acid mutation sites of Aqp3a in the DL *L. waleckii*.  $\alpha$ -helix: Transmembrane helix H1-H6, two short helix HE and HB. The NPA was highlighted in red. The Ar/R was highlighted in purple. The amino acid –number: the amino acid at this site –its position on the amino acid sequence. The aqp3a.4(Ser66) and Ar/RPhe63 were highlighted by orange stars.

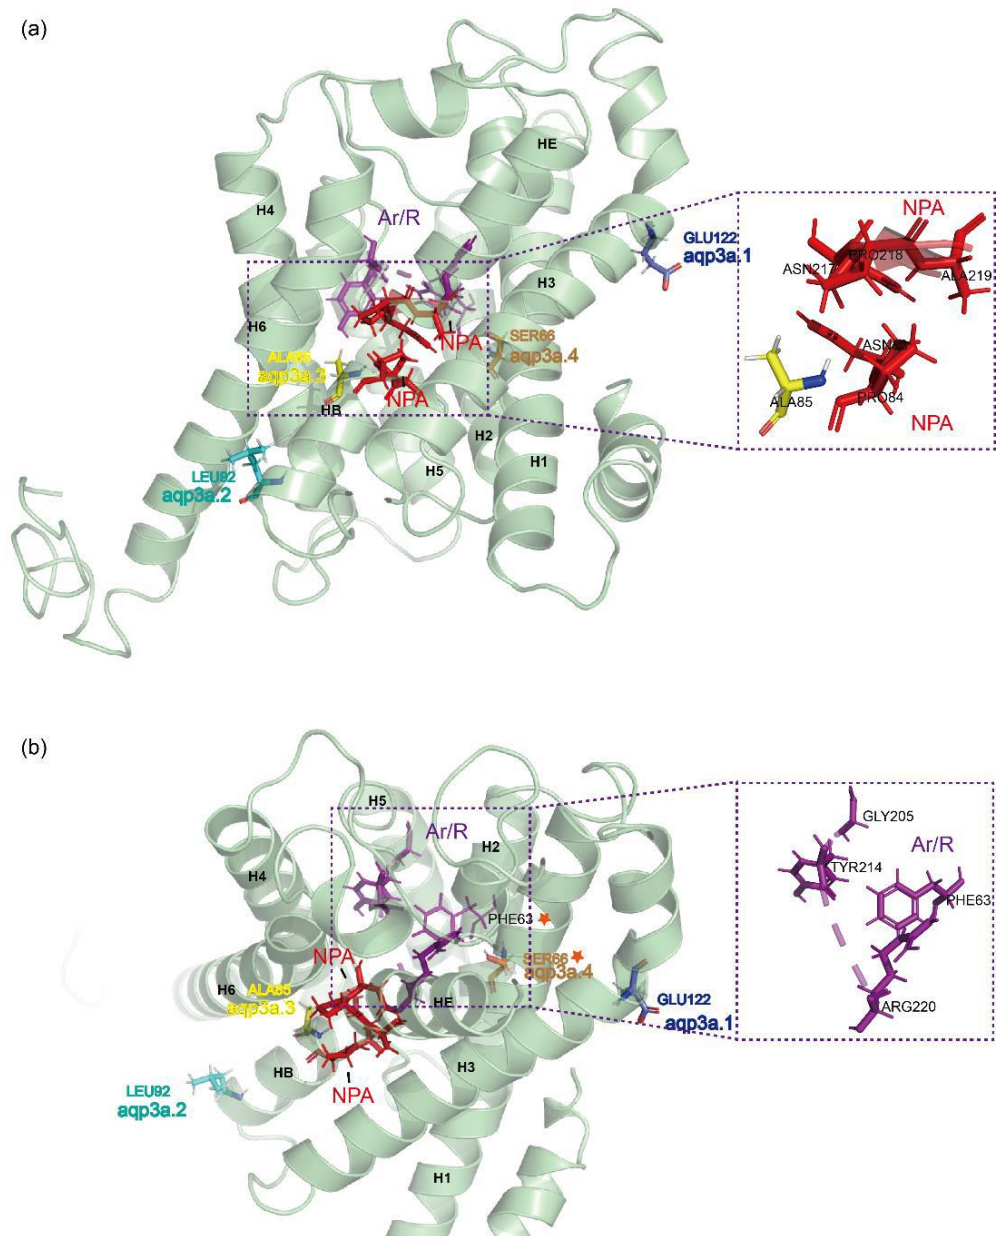

Supplement: s1 [file s1]
