# Supplementary material
Source: MDPI journal article supplement (https://www.mdpi.com/2410-3888/8/2/107)
Supplement: s1 [file s1]

Archive with 5 entries (5 files):
- Supplementary Figure S1.pdf
- Supplementary Figure S2.pdf
- Supplementary Figure S3.pdf
- Supplementary Table S1.pdf
- Supplementary Table S2.pdf
