# Supplementary material
Source: MDPI journal article supplement (https://www.mdpi.com/2410-3888/8/2/107)

**Figure S1.** Manual analysis of the aqp3a leading to the theoretical redefinition of aqp3a used in this work. (a) Amino acid sequence homology alignment. The orthologous sequences in *Pimephales promelas*, *Danio rerio*, *Cyprinus carpio* was used to align to reconfirm the Lw Aqp3a. PpAqp3a (*Pimephales promelas* Aqp3a) NCBI code: XP\_039505890.1; DrAqpAqp3a (*Danio rerio* Aqp3a) NCBI code: NP\_998633.1. The NCBI code CcAqp3a-1 (Cc: *Cyprinus carpio*) of CcAqp3a-2 is aXP\_042580483.1 and XP\_042613291.1, respectively. The two truncated sequences of Aqp3a were named Aqp3ap1 and Aqp3ap2, respectively (the “p” referred to pseudogene). (b) Genomic structure analysis

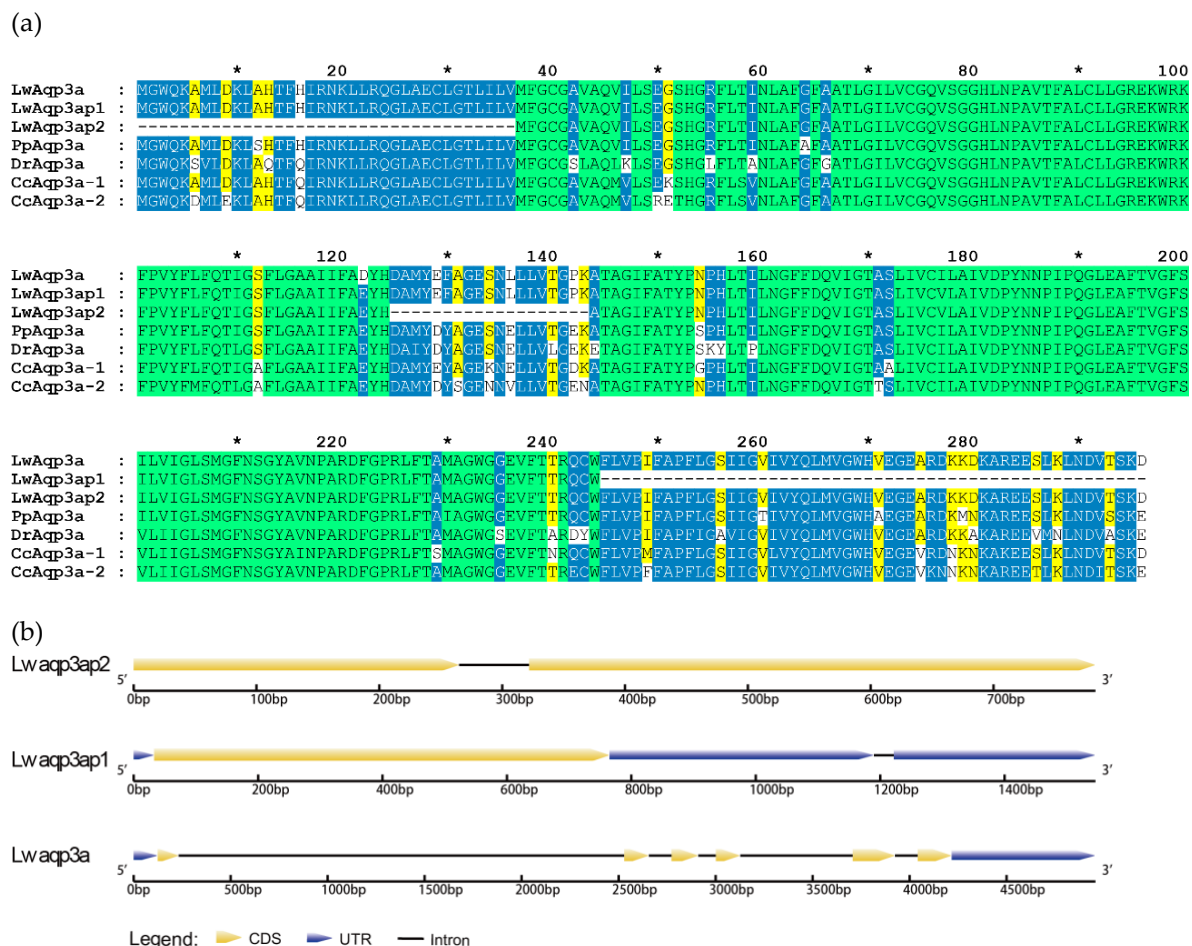

Supplement: s1 [file s1 › Supplementary Figure S1.pdf]
