# Supplementary material
Source: MDPI journal article supplement (https://www.mdpi.com/2410-3888/8/2/107)
Supplement: s1 [file s1 › Supplementary Table S2.pdf]

**Supplementary Table S2.** Detailed LwAqp sequences (genomic, CDS and protein sequences) from *Leuciscus waleckii*. The first row for each subfamily is genomic sequence, the second row is CDS sequence and the thirs row is protein sequence.

| Gene name              | Sequence                                                                                                                                                                                                                                                                                                                                                                                                                                                                                                                                                                                                                                                                                                                                                                                                                                                                                                                                                                                                                                                                                                                                                                                                                                                                                                                                           |
|------------------------|----------------------------------------------------------------------------------------------------------------------------------------------------------------------------------------------------------------------------------------------------------------------------------------------------------------------------------------------------------------------------------------------------------------------------------------------------------------------------------------------------------------------------------------------------------------------------------------------------------------------------------------------------------------------------------------------------------------------------------------------------------------------------------------------------------------------------------------------------------------------------------------------------------------------------------------------------------------------------------------------------------------------------------------------------------------------------------------------------------------------------------------------------------------------------------------------------------------------------------------------------------------------------------------------------------------------------------------------------|
| Lw_Aqp0a<br>(OQ301583) | ATGTGGGAGTTCCGGTCCATGTCTTTTTGGCGGGCTGTGTTTGCCGAGTTCTACGGCACCATG<br>TTCTTTGTGTTCTTCGGGCTGGGAGCAGCTCTGCGTTGGACCACCGGGCCACACAACGTGCT<br>CCAAGTTGCCTTCTGCTTCGGGCTGGCAGCTGCCACACTCATCCAGTCCATCGGCCACATCA<br>GCGGTGGCCACATCAACCCGGCCGTCACGTTTCGCCTACCTGATCGGCTCGCAGATGTCCCTG<br>TTTCGTGCTTTCTTCTACATCTGTGCTCAGTGCTTGGGCGCGCTGGCTGGAGCCGCTGTGCTG<br>TATGGGGTTCACGCCAAGCAATATGAGAGGCAATCTGGCCCTGAACACGGTAAGAGGGTGCA<br>TTTGAATCAGTGAGTTCATTAGTTAAAATAATGGCTTATTTACAAGTGATACAACTGATTGAT<br>CAATGGTTTAAACCAGAGATGTTTAAAAAAAATGAAAATAATAGTGGACAATAAATGTATTTT<br>GGATCATTTTTTGGCAGTTTTTCTACAGCGTATGCGTATATATGCTTTCAGCTTCAGCCAGGC<br>ATCAGTGTGGGAATGGCCACCACCATAGAGATATTCCTGACTCTGCAACTTGTAGTTTGTGTC<br>TTCGCTGTGACGGATGAGAGGCGAAACGGGCGACTGGGGTCTGCTGCCCTGTCCATTGGTTT<br>CTCAGTGCTTTTGGGTACCTGCTGGGGGTAAGAGGCCATCCACAGGACAGATTCAGTCTTA<br>AAAGCAGTTCACCTAAAAATGACAATTTTGTCTATAATTTACTCCTGTATTTACTCCTGAATCGT<br>ATGCCCTTTTTCTCAAGTGTAACACAAAGACTTGACTTGACATGAATCTCATTGCAGATGTAT<br>TACACTGGAGCTGGAATGAACCCTGCCAGGTCTTTTGCCCTGCTGTGCTGTTTAGGAACTT<br>TATTAACCATTGGGTGAGGCACATTTCCATCATATTCAGATGAAGAAACATTTTGCGGATTGA<br>ATCATAAACGTAACAGTTTTCTGTCTGTTCTGGTAGGTCTACTGGGTGGGCCCTATGATCGGT<br>GGTGCTATGGGCGCCCTGCTGTACGACTTCATGCTCTTTCACGCATGCGCGGCCTGTCCGA<br>GCGACTGGCCACACTCAAGGGCGACCGGCCTCCCGAGGCCGAGGCCAGCAGGAGACCAG<br>AGGAGAACCGATTGAGCTCAAAACACAAGCCTTATAA |
|                        | ATGTGGGAGTTCCGGTCCATGTCTTTTTGGCGGGCTGTGTTTGCCGAGTTCTACGGCACCATG<br>TTCTTTGTGTTCTTCGGGCTGGGAGCAGCTCTGCGTTGGACCACCGGGCCACACAACGTGCT<br>CCAAGTTGCCTTCTGCTTCGGGCTGGCAGCTGCCACACTCATCCAGTCCATCGGCCACATCA<br>GCGGTGGCCACATCAACCCGGCCGTCACGTTTCGCCTACCTGATCGGCTCGCAGATGTCCCTG<br>TTTCGTGCTTTCTTCTACATCTGTGCTCAGTGCTTGGGCGCGCTGGCTGGAGCCGCTGTGCTG<br>TATGGGGTTCACGCCAAGCAATATGAGAGGCAATCTGGCCCTGAACACGCTTCAGCCAGGCAT                                                                                                                                                                                                                                                                                                                                                                                                                                                                                                                                                                                                                                                                                                                                                                                                                                                                                                                                       |

|                        |                                                                                                                                                                                                                                                                                                                                                                                                                                                                                                                                                                                                                                                                                                                                                                                                                                                                                                                                                                                                                                                                                                                                                                                                                                                                                                                                                                                                                                                                                                                                                                                                                |
|------------------------|----------------------------------------------------------------------------------------------------------------------------------------------------------------------------------------------------------------------------------------------------------------------------------------------------------------------------------------------------------------------------------------------------------------------------------------------------------------------------------------------------------------------------------------------------------------------------------------------------------------------------------------------------------------------------------------------------------------------------------------------------------------------------------------------------------------------------------------------------------------------------------------------------------------------------------------------------------------------------------------------------------------------------------------------------------------------------------------------------------------------------------------------------------------------------------------------------------------------------------------------------------------------------------------------------------------------------------------------------------------------------------------------------------------------------------------------------------------------------------------------------------------------------------------------------------------------------------------------------------------|
|                        | <p>CAGTGTGGGAATGGCCACCACCATAGAGATATTCCTGACTCTGCAACTTGTAGTTTGTGTCTT<br/>CGCTGTGACGGATGAGAGGCGAAACGGGCGACTGGGGTCTGCTGCCCTGTCCATTGGTTTC<br/>TCAGTGCTTTTGGGTCACCTGCTGGGGATGTATTACACTGGAGCTGGAATGAACCCTGCCAG<br/>GTCTTTTGGCCCTGCTGTGCTGTTTAGGAACCTTTATTAACCATTGGGTCTACTGGGTGGGCCC<br/>TATGATCGGTGGTGCTATGGGCGCCCTGCTGTACGACTTCATGCTCTTTCCACGCATGCGCGG<br/>CCTGTCCGAGCGACTGGCCACACTCAAGGGCGACCGGCCTCCCGAGGCCGAGGCCCAGCA<br/>GGAGACCAGAGGAGAACCGATTGAGCTCAAAACACAAGCCTTATAA</p> <p>MWEFRMSFWRAVFAEFYGTMMFFVFFGLGAALRWTTGPHNVLQVAFCFGLAAATLIQSIGHISG<br/>GHINPAVTFAYLIGSQMSLFRAFFYICAQCLGALAGAAVLYGVTPSNMRGNLALNTLQPGISVGM<br/>ATTIEIFLTLQLVVCVFAVTDERRNGRLGSAALSIGFSVLLGHLLGMYYTGAGMNPARSFAPAVLF<br/>RNFINHWVYWVGPMIGGAMGALLYDFMLFPRMRGLSERLATLKGDRPPEAEAQQETRGEPIEL<br/>KTQAL</p>                                                                                                                                                                                                                                                                                                                                                                                                                                                                                                                                                                                                                                                                                                                                                                                                                                    |
| Lw_Aqp0b<br>(OQ301584) | <p>ATGGGCGCAGCGCTGCGCTGGACCTCGGGGCCGTACCACGTCTTCCACACCGCCCTCTGCTT<br/>CGGTTTCGCTGCTGCCACACTCATCCAATCCATCGGACACATCAGCGGAGGACACATCAATC<br/>CGGCCGTCACCTTCGCCTACTTAGTGGGCTCTCAGATGTCCCTGTTTACAGAGCTTTCTTCTACA<br/>TTTGTGCCCAGTGCCTGGGGGCCATGGCAGGGTCCGCGGCCCTCTACGGAGTCACACCCAA<br/>CAACATGAGAGGCACACTGGCACTGAACACGGTAAGAGGGACTCCAAGAACAAGAATTATA<br/>TTGGATTTATTTATATTTTTATTTTATTTTATTTTATTTTATTTTATTTTATTTTATTTTATTT<br/>TTTTTTATATATGCACATTTTATGTTTTTTTTTACAAGTATTTTTTAAATGATACTTACTGTAT<br/>ATAGCACATACTAACAGGCCCTTACAGAAAGAGGTATCTATGTTGTGGTCTTTTAACTTTCA<br/>TCCATATTTTTCCGTGTACCTGTTTATGTGTGTACAGCTGCAGCCCGGGATCAGTCTGGGAAT<br/>GGCGACCACGGTGGAGGTGTTTCTCACCATGCAGTTGGTGATCTGCGTCTTCGCCGTCACAG<br/>ACGAGAGACGGAACGGGCGTCTGGGTTCTGCCGCTCTGTCCATTGGCTTCTCTGTTACCATG<br/>GGCCACCTGATGGGGGTGAGCAAGACTAAATTAGAATAAACTCTTTTTTTATGTTTGAGTTTT<br/>TTTTACTGTGCAGTACGCTGAAAATGTCCCATGTTATTTGTGTTTGAATCAGATGTACTACACT<br/>GGCGCTGGCATGAACCCAGCCAGGTCTTTCGGCCCTGCTGTTCTCATGAGGAATTTTCATCAA<br/>CCACTGGGTAAGAAAAAAACCACGACCCATAAAATACTGAAACTGCCCCGTTCTACAGGTC<br/>ACGGAATACTTAGAAAGATTAGTTTCTAAGTTTCTAAAATAGATAGACAGATATAGACATAG<br/>AGATTGATAGAAAGACACAGACAGACAGATGAATAGATATACAGACAGATAGATAAATAGAT<br/>AGATTAATACAGACAGAAAGATAGATAGACAGACAGATAGACAGACAGACAGACAGACAGACA<br/>CAGACAGATAGATAGATAGATAGACAGATAGATAGATAGATAGACAGACAGACAGACAGATAGACA<br/>GATAGACAGATAGACAGACAGACAGACAGATAGATAGATAGACAGACAGACAGACAGATAG<br/>ACAGATAGATAGATAGACAGACAGACAGACAGACAGACAGACAGACAGACAGATAGACAG<br/>ATAGATAGACAGACAGACAGACAGACAGACAGACAGACAGACAGACAGACAGATAGACAG<br/>ACAGACAGACAGACAGACAGACAGATAGACAGATAGACAGACAGACAGACAGACAGACAG</p> |



[illegible]

|  |                                                                                                                                                                                                                                                                                                                                                                                                                                                                                                                                                                                                                                                                                                                                                                                                                                                                                                                                                                                                                                                                                                                                                                                                                                                                                                                                                                                                                                                                                                                                                                                                                                                                                                                                                                                                                                                                                                                                                                                                                                                                                                                                                       |
|--|-------------------------------------------------------------------------------------------------------------------------------------------------------------------------------------------------------------------------------------------------------------------------------------------------------------------------------------------------------------------------------------------------------------------------------------------------------------------------------------------------------------------------------------------------------------------------------------------------------------------------------------------------------------------------------------------------------------------------------------------------------------------------------------------------------------------------------------------------------------------------------------------------------------------------------------------------------------------------------------------------------------------------------------------------------------------------------------------------------------------------------------------------------------------------------------------------------------------------------------------------------------------------------------------------------------------------------------------------------------------------------------------------------------------------------------------------------------------------------------------------------------------------------------------------------------------------------------------------------------------------------------------------------------------------------------------------------------------------------------------------------------------------------------------------------------------------------------------------------------------------------------------------------------------------------------------------------------------------------------------------------------------------------------------------------------------------------------------------------------------------------------------------------|
|  | <p> GTTTTAACTTAGTCATGTTTGTGTATTGTTTGCTAAAGGTTTCTTAGTGTACTCAGGGTCGCAG<br/> ATAGCACATGTTTCATGGCAGAGATGACTATTTAAAGTGCATGTTTTTCATCCGGTATTTTACCTC<br/> AGATGTAGAGAATTTGCTCATTTGCTATATAATGTTGAATAGAAATGTCTTTTAAGATGTTTATC<br/> AGATGTGTATGTGCTTCCTAGGGTTAGTGATACACTGTCAGAAATAGGGGTACAGTAGGAGT<br/> CCATTTCTGTCCCCCAAGGTACAATCTACACTAACGTACCCCATAGGGCTTATTATTGGACCTC<br/> AAGGTATATGTACCTATTTGAGGGTCAAAAAGCATTGAAAGGTATATGTACCGTTTCTTTTAA<br/> AGGTAAAGGTACAATATTGTACCCTTGAGGGGTACAGCCCCAGTGACAAGCCATTGTACACCT<br/> AAAGGTACAATTATGTACTTTACTTTTCTGAGAGTGTATGAAGAAACCGCTTACCTGAAGTATG<br/> TTTGGTACGGACATGAATGATACCTTAAAATGTGTGGCTTGTTGAGAAGAGATGTGCTATTAA<br/> GAACATCTGATGTCAAGTCAAGTTACCTCTATTTATACAGTGCTTCATACATTACAGATTGTTT<br/> CAAAGCAGCTTTACAGTGATAACAGGAAAATAATGCATTTTCGACTTGTTTCAGCTGAAGTTAG<br/> TTCAGTGTTGATTTCAGTTCCATTGCGAAGATCATCAATTATTAAATTAGTTTCATTTTCATCTATAA<br/> AGCACTTCTACAAAAAAGATGTCATCGTCCAGCTCAGTTCAGTTCTCATACTACAGTGTCAG<br/> TGCAGTCAGATCAATAATGTCGTCGAATATTAAGTTTTCCTCAACTAAGCAAGCCAAAGGTGA<br/> AAGTGGAAGGAACCAAACTCCATCAGTGACAGAATGGAGGAAAAAACCTTGGGAGAAA<br/> CCAGACTCAGTCGCTCAATTCTCCTCTGGCCAATGAACAAACAGTGTATAATTATGATTCAGG<br/> CTGCATTACTGATTACACTGCATACTTACATTTGAGTAGAACTTGAGTCATATTTGGGAACCA<br/> AAATAACAAGGATATGCAACCAATCTCTAGCATTGACAACAAATTAGAAAAAGTGTAGCACT<br/> GGCATGCACCCTCAGATGTTGTTTATATGATATTACCATAAGATGTCCTTCCATAAACGCAAAT<br/> ATTTTTATACTGTTCTTAAAGGATGTTTGAAATGATTTCTTCACTGTTTTTCAGGTGTACTGGGT<br/> CGGCCCTATGTGTGGAGGTGTGGCAGCCGCGCTGGTCTATGACTTTCTGCTCTTCCCTAACT<br/> GGACGACTTCCCTGAGCGCGTGAGAGTGCTGGTCTCCGGCCCAACACAGACTATGAGGTC<br/> AACGGTACTGACGACCCCCCTGCTGTAGAGATGTCTTCAAAGTGATGCAATACTCGGCATATT<br/> TAGTGAATGATATTCATCAAGACCAGAAAAATATCTGTAAATATATCCTTTTTTTTTCTTACAGG<br/> GAAATAGCATTCTTTTTAAATTTACTATATGACAGTCTGGAGTTGCAAATGTAAAACCATTTAT<br/> GTAGTTGCTCAAAAGGACAGTTGGCATTGTTGTATTGACTGATTTGAGTTTTGTATTAATGTTTT<br/> TACTCTTATTTAGTGAAACAGTATGTACCTCAGGAAAATTATACAGTTTTTCACTATTTTTTTTT<br/> AAATTTACATATAAGCTTTCAAATTTAGATTCACTTTTTGTGAACTTTTTTTCACTCTGTAT<br/> TGTATTATGTGTACACTATGATGTTGTTTTTTGTAATTAACCTTCAGGATGTTTAATCTAAAATA<br/> TAAGATGTTTTTCTTCAAATTAATAATGAAAGTCAAATGACAAAA </p> |
|  | <p> ATGAAGGAGCTAAAGAGCAAGGCGTTCTGGAGGGCTGTTTTGGCTGAGCTGGTCGGCATGA<br/> CCTTTTTCATCTTCCTGAGCATTACAGCTGCAGTTGGAAACACCAACAATGACAAACCAGAT<br/> CAGGAGGTCAAGGTGGCACTTGCAATCGGGTTGTCCATTGCCACTCTTGCCCAAAGCCTCGG<br/> TCACATCAGTGGAGCTCACCTGAATCCAGCTGTGACGCTGGGCTTGCTGGCCAGCTGTCAGA<br/> TCAGCTTGCTGAAGGCTGTGATGTATATCGTGGCCAGATGTTTCGGTGCAGCGTTGGCGAGT </p>                                                                                                                                                                                                                                                                                                                                                                                                                                                                                                                                                                                                                                                                                                                                                                                                                                                                                                                                                                                                                                                                                                                                                                                                                                                                                                                                                                                                                                                                                                                                                                                                                                                                                                                                                                                                |

|                         |                                                                                                                                                                                                                                                                                                                                                                                                                                                                                                                                                                                                                                                                                                                                                                                                                                                                                                                                                                                                                                                                                                                                                                                                                                                                                                                                                                                                                                                                                                                                         |
|-------------------------|-----------------------------------------------------------------------------------------------------------------------------------------------------------------------------------------------------------------------------------------------------------------------------------------------------------------------------------------------------------------------------------------------------------------------------------------------------------------------------------------------------------------------------------------------------------------------------------------------------------------------------------------------------------------------------------------------------------------------------------------------------------------------------------------------------------------------------------------------------------------------------------------------------------------------------------------------------------------------------------------------------------------------------------------------------------------------------------------------------------------------------------------------------------------------------------------------------------------------------------------------------------------------------------------------------------------------------------------------------------------------------------------------------------------------------------------------------------------------------------------------------------------------------------------|
|                         | GGCATCGTGTATGGCGTCACGAAAGGGGACACCCTGGGGCTGAACACGATCAACAGCGATA<br>TCTCTGCAGGTCAAGGTGTTGGTATTGAACTCTTCGCTACCTTCCAGCTAGTGTTGTGTGTCT<br>TAGCAACCACAGACAAAAGAAGGCGGGATGTGTCAGGCTCCGCCCCCTTGGCCATCGGCCT<br>CAGCGTTTGCCTGGGACATTTGACAGCCATCAGTTTCACGGGATGTGGAATCAATCCAGCTC<br>GATCCTTTTGGTCCGGCATTAAATTCTGAGAGATTTTACCAACCACTGGGTGTACTGGGTCGGCC<br>CTATGTGTGGAGGTGTGGCAGCCGCGCTGGTCTATGACTTTCTGCTCTTCCCTAAACTGGAC<br>GACTTCCCTGAGCGCGTGAGAGTGCTGGTCTCCGGCCCAAACACAGACTATGAGGTCAACG<br>GTACTGACGACCCCCCTGCTGTAGAGATGTCTTCAAAGTGA                                                                                                                                                                                                                                                                                                                                                                                                                                                                                                                                                                                                                                                                                                                                                                                                                                                                                                                                                                                                                |
|                         | MKELKSKAFWRAVLAEVLGMLFIFLSITAAVGNTNNDKPDQEVKVALAFGLSIATLAQSLGHIS<br>GAHLNPAVTLGLLASCQISLLKAVMYIVAQMFGAALASGIVYGVTKGDTLGLNTINSDISAGQG<br>VGIELFATFQLVLCVLATTDKRRRDVSGSAPLAIGLSVCLGHLTAISFTGCGINPARSFGPALILRD<br>FTNHWVYWVGPMCGGVAAALVYDFLLFPKLDDFPERVRVLVSGPNTDYEVNGTDDPPAVEMS<br>SK                                                                                                                                                                                                                                                                                                                                                                                                                                                                                                                                                                                                                                                                                                                                                                                                                                                                                                                                                                                                                                                                                                                                                                                                                                                     |
| Lw_Aqp1ab<br>(OQ301582) | TTTCACTAGGTGTTTATAAGTGGTAGCTTAGCAGGCATTTTCATTTACCAGCTAAAAGGCAGA<br>AGAGGAACAATTCTTGTAATGGCACGAGAGCTTAAAAGTTGGTCCTTTTGGCGGGCAGTATT<br>GGCCGAGTTTGTGTTGGGATGACCATTTTTGTTTTTATTGGTATAGCCTCTGCCATTGGAAACAG<br>GCACAACAGATATCCTGACCAAGAGGTTAAAGTAGCTTTAGCTTTTGGTCTGGCGATTGCCA<br>CACTGGCTCAGAGTTTGGGGCATATCAGTGGAGCCCACTTGAACCCAGCTATTACTTTAGGA<br>CTTTTGGTTAGCTGTCAGATCAGTTTCTTCAGGGCCTTCATGTATGTCATCGCCCAGATGTTG<br>GGAGCTGTGCTGGCAAGTGGCATTATGTTCAAAGTTAGCCCTGACCCTGACACAACACTGGG<br>GCTCAATATGGTAAGTTGCTTTATACAGAGTATTCAATTTCAACCACTAATACTATTCAAAATT<br>GTATTACATGGTTACTTGTATATGGGGATATTTTATATATATTCTTTCTTTCTTTTATTTGGGG<br>CTGCAAAAGGGTTCTATGGAGTTCATTAATAAATAAAAAGAAGAAACGAAGACATGTGCATTT<br>AAAATATTAGGGAAATATTTTAAATGTAATTATTTTCTATACATATACATAATACATTTTCATAA<br>GCTGTCAACTCAAAAAACAATGTAAATATTTTCCAGGTAATATTTTAAACAATTTGCTTTAGTGC<br>CATAACTAAATACAAAGGCAATAATTAACTTTTCTTTTCTTTTAAATGTTTTAATTTCCATTTTTT<br>GTAGGCCAAAACAATTGTTTGATTTTGTTTATATTATATTTTCCATTTTGTCTTTTCATTTTATT<br>TCATAATTGTTTTACTGTAAATTTTTTACTATAAAAAGTCTACAATATTTAATGGTATAGATTCC<br>CATTGTGACTATTTTCCCCATGTAGTGTGACTACACTCCCTGCTAATGGGGTAAATGTTTGTTA<br>AATGAGCAGTCTTTTCTTCTGACAGTAATGGTGCAAATGTTCAAATTTCAATCAGATGTTAG<br>GAGGTATTCTTGAAATCACATTTATTATCTTGTCTTATGATTGTAATATGACAGTAGTAGTATCA<br>TGTTGAACTTTTTGCATCATTACAAGGTAATCCCCTTTTCTTTTTTTTTCTTTTTCTTTTTCTT<br>GTAGCTGAGTAACGGTGTGTACAGGGGCAGGGATTTGCCATTGAGCTCTTTGCAACCTTTC<br>AGCTGGTCCTCTGTGTCTTGGCCACAACAGACAAACACCGGACCGATGTCAAAGGCTCTGC<br>ACCCCTAGCCATTGGACTATCAGTGGGTTTAGGGCACCTGGTAGCAGTAAGCAAGCACTTGA |

TAATTGACTTTTTCATCAACCAAACGTAAATGATACGCAATGTTCTTAGATCAGTAGATTTC  
ACCAAGCTTAATCAAGACTCTTTTCTGCTGCATGCATAACCTTACAAGCTCCTCATTCTCATC  
CCCAGATCAGTTACACCGGCTGCGGCATCAACCCTGCTCGATCTTTTGGACCAGCCGTTATTC  
TTGAATCCTTTAAAAACCACTGGGTAAGTTCGCACCTCATTTTATCAACAAGGTTTTTGTGAG  
AACAATTGCATTGCTGTTTGTGAGTAAAAAATAATGGCAACTTAAATGCTTTGC  
TGAGGGTAGAGATTAGTCATTTTATGATTTGATTATATTTGATTTTGCATTATAAACATTGTGA  
CATAGTATTACTTCTTCAAAGCATTATAGGCCAGAAAAGAAAACGTTTGGTTCTGTTCTTT  
TGCGTACAATTTTATCAAATAATTACCAATTATTTCTTGTATAGATATACTGGATTGCACCCAT  
GATCGGTGGGGTGGCTGCTGCTCTTGTGTATGACTTCTTGCTCTACCCAAAAAAGGAAGCGT  
TTGGCAAGCGTATGAAGGTTCTGAAGGGCACGGCTGATCCGGACGCCTCGGCGACAGAACC  
CCTAATCGAACCCCGAACCCCGAGATCTGGGTCTGGTCAGTGGCCTCGGCCCTGAAATGTGT  
CTTTAACCTTCATTAAATGTCTACATACATTACCAAAATATACAACATCATTTCTTTTGTGTTG  
TCAAAATGATTGTTTAGTCGGCTTCTTCTAGTGTCTTACTCTGTGTAGCAGCATCGTTCTGGCT  
AGATTGACTACTTGCACGGCTACTTCCAACACTTAAGGAAGTGTCTGCCGTCTATAACATCT  
CAGGAATTTCTGTAAACAGCATTACAGCGCACTTACTGATTTATTCTTGGGGAGGCAGATTATT  
TTTGCTTTACGGGCTGGCAGTTGATTGAATAAATAATCTTGTTTTCAGCATTACCGTGACTTA  
TCTTGACTTTTGAGTTTGCCATAATTTTCTATCTATATTTATTTTCTTATAAATCTTATGTAATC  
AGTCTCAAATGGTAACTTGCTGGCGGCCCTATACTGTAAACATACAGTTGTGGTTATAAGTTT  
CAATAAACCTTGCAGAATCTGTACAAAATAATTATAATAATAAATTTTAAACAAAATAAGAGG  
GATTATAAAAATTGCTTGTTTTTTTTGTGTTTGTGTTTGGTAGTTCCATGAATAAGCTATTTCA  
CTTAATAGATGTTTACATATTGTCCACAAGACAAAACAGTAAATGAATTTACAAAATGTTTCA  
ACACTTGATTCTTAATACTGCATGTGTCTCTTTACCTGGATGATCCACGACTGCTTTTTTTCTT  
TATCGTAGTTGACATGATTCCCTTAATTGTCCTGAGCAGTTAAACACTGTTCTTCAGAAAAAT  
CCTCTAAGATTTGTTTATCTTCTTTGGTTTTCCAGCATCTTCTGCATATTTGAACAACAATATT  
TCCAACAAAATAAGGACAACTTACTCTGATCATCCTGTTGTTACCCCTCTTATTTAGTTAAAAT  
GATTAACATTATTATGACCACAACTGTATAATAAGGTGATGTCGTTTGTCTCTCTCTTAGATG  
CATAATGGGTTCATGAAGTCTCTCTCTCTCAGACATTGCAGCATTATTAGACAGTGGTTG  
TTGAAGACCTCCATGTAAACAGTAATATTCAGAATATTTATTCTGTGTTTGAAAATGTATGGAC  
TCTGAACAGTATGATTTTAAAGTGGCATTTTACAAATTAGACAATTAGACAAGAACCACATTA  
CAGAAGTTTCTGTGGCACTAGCATATCAAATTTGCAAAACAAGTTTCCCCAACACTATCCCC  
ATCTGCCATTGATTGAATAGAGGGTCCAGCCAGGCTATTTGGTTAGACATTGTTATGTCGGCC  
AACTGGGATAATCAAACAAACACAGCAAAGCTTTGAAGAAGTTAAAAAGCCACAGTTTCA  
ACACATTTCAAAGTCTCGCCTTATGAATGCTGTCCCTTGATATTACACTGGGAAAAGAGGAA  
AGTGTTTTAACATTGAAAGAATTAAGCATTTGCAAATCTGTAGCAATATACGCTCAGCTTTGT  
ACTGAGAGGTTTATGAGAACAACCTTCTGCGAAGCAGTTAACAAGTATAACCAAACCAACCTG

ATGTCAACTTCTGTATCACCTCCAGACTAACCGATGCTAAAGCTGTCACACAAGTCAGCATT  
TGTGACTGCCACGAGTTACAAAGAATTAACAAAACCTCTTTGTCGGACATTGTCACGAACTG  
AATGTCTCATGCTGTTTGCTCTGTACTAACTGTAAACATAATTGAACTTAATATATCCACTAGC  
ACATTTTGAAAGGAATGATTGTGTTTCCTTTTTGGCGCAGTCATATGTATTGCATGCATGGATG  
CCGCTCACTTAGGCATTTATCATTTTTAATGAGCACTACAGCAAACCCTGTCAGGTATCTACAA  
TACATCTCTTTAGGGAGATCATTTTGCTTATGAGAAATAATCATCAATGCTTAGCATCTGTTTT  
TTAAACAAAAAACAAGCCATCCCAAAATGCATCAGAGTGGATCTGCA  
TTGGAGCATTGCCAAGAATTTAAGGAGCTTGCTAAAATTCTTGGCCGGCATTCAAATGGCA  
ATCCTAACTTTTGATTTCGGTTTCATTGTAAACTATGATTTCGTTTATTGTTTTATGAGGTAG  
ATGAGGTAGTTTTAGTCTTATTTCAAATGATTTGACAATATTTGTATATCTGGTAATCAAGTAT  
AGGGAAAACTGTTTCCAACGATTGGAAACAGCACAATCTAATGGACAGGTGATGACCACA  
GCATGCAATTACCTGTTCCCTTTACTCAAAATACTTTTTTGGGCCTCATTCATAGAGCATGTTG  
CATATTTGCACATGTAGTCTCTTTGACAATTGTTGCAAGTAATTGTAAAGCAATCCTTATGTAA  
ACCGTGCAGAATCTGTCATAGAATGCAAATAATTGTTTGTGAAACAATTCATAAATTGTCACA  
AAAAAATATAAATTTAAGTGAAATGATTCTTGTGGTAATTTCCAATTTTTTGGATACTTTACAT  
GTTCTGTTTTTTGCTTGCCAGACACAGACTATCCATCTATCCATCCATTTTGCAAACCATTTGT  
CCTCTGCAGGGATGCTGGAGCGTATCCAGTCATCTCAAAAACCATGAAGTGATAATGGGAAT  
TGCAACATTTTTTAACTTGCACACTCAAAGATAATAAAAAAAGAAGAATAATAATAGTCAT  
TCTTCAACTGAAGAAAAATTGTAAACCAAATGTGTTATGAAAATTTGCTGGCTTAAGAGCTT  
TTAACTTCCCCTGCAACCTAAACACATAGAGAAGAGTTTGGTGGCTTTGCTGAGGGTGGAGT  
GAGACTTTTGAACAACATTTATCAGGTGACAGAACTGCAACACCCAAAAGTTCAGTTATCAG  
TTTCCTCACATTGTGCTGATGAGGCATAAACAAGCACACACTGCAGATCTCCTCGAGCACAC  
TTGCATTGCTTGACAAAAGCGAAATGCAAAGCAAATTCAAGGAGTCTCAGGGGGACTGTGA  
GTTTCATGGTGTGAATTTCAAGGGGGGACCAGTCCAACCTTACAATGTAGAGGATTTACATCT  
TTTATCCACGTAATCCCATCCAAATGCTATGCAAATTTCATACATAAATATAGTGGGAATATGGT  
TTAAAAATAAAAAATATAGGCTACCCCCAGTGAATCTCAGGCATTCCCACCACTAACCTAA  
AGGTGTCTTGAACAATCTATGCATGAGCCGCAATCTATAGGAGAGAAGAATGGGATCGGGAT  
TCAAACCTCAGGATGATTGTCAAAATATCTAACCTCAATCCTTACTCTCCACACCACTATTCT  
GAAACAGACTCTTCTTTTTATTTGTTTTGTTGCCAAGAGTGTAATTTTTGTTTGCTTTTTACAG  
AAATACAATATAAACTTTTTTATTGAGTTGTTATCTGACTTGTGTTTGTCTTTTTGTTTTAT  
TTCAGGAGGTCTGGGAGATGAGTAAACATGGATTACAGAACCAACAGACAACTCCTCTCT  
GACAGATTTAAGTTAACCGGATACCCAGCAAGCAATAGCCTATAGACCCCATATAGTCCGGCT  
ATGAGTAAACCACTTCTAGCCAAAATAACTTGCATCTCGTATGATATTCCATCATGTCAACAGT  
GAAAATGATCTGCAGATCAGTAGGATATTTTTATTTTTAAGTAATATTGCACTGATGATTTACATC  
ATAAATATATTATTCTTGAAATTAGATATTTAAAGCCATGTGCCATTATTGGAAATTACAAAAA

|                        |                                                                                                                                                                                                                                                                                                                                                                                                                                                                                                                                                                                                                                                                                                                                                                                                                                                                                                                                                                                                                                                                                                                                                                                                                                                                                                                                                                                                                              |
|------------------------|------------------------------------------------------------------------------------------------------------------------------------------------------------------------------------------------------------------------------------------------------------------------------------------------------------------------------------------------------------------------------------------------------------------------------------------------------------------------------------------------------------------------------------------------------------------------------------------------------------------------------------------------------------------------------------------------------------------------------------------------------------------------------------------------------------------------------------------------------------------------------------------------------------------------------------------------------------------------------------------------------------------------------------------------------------------------------------------------------------------------------------------------------------------------------------------------------------------------------------------------------------------------------------------------------------------------------------------------------------------------------------------------------------------------------|
|                        | <p>CTTTTTTTTTTTTTTAAAGCTAATGTATCTTGCAAAAAAAAAAAAAAAAAATAATAATTGAGTG<br/>AGTGAGTGTTTCCATTTTTGATTGTGCTGTTTGCACTAAGTCTGTATTAAATGAAATTTGCGAC<br/>CAACTTTACTTCTGTATTGTGATATAATGTGTTGACCACACAGAAAACATC</p> <p>ATGGCACGAGAGCTTAAAAGTTGGTCCTTTTGGCGGGCAGTATTGGCCGAGTTTGTGGGAT<br/>GACCATTTTTGTTTTTATTGGTATAGCCTCTGCCATTGGAAACAGGCACAACAGATATCCTGA<br/>CCAAGAGGTTAAAGTAGCTTTAGCTTTTGGTCTGGCGATTGCCACACTGGCTCAGAGTTTGG<br/>GGCATATCAGTGAGAGCCCACTTGAACCCAGCTATTACTTTAGGACTTTTGGTTAGCTGTCAGA<br/>TCAGTTTCTTCAGGGCCTTCATGTATGTCATCGCCAGATGTTGGGAGCTGTGCTGGCAAGTG<br/>GCATTATGTTCAAAGTTAGCCCTGACCCTGACACAACACTGGGGCTCAATATGCTGAGTAAC<br/>GGTGTGTCACAGGGGCAGGGATTTGCCATTGAGCTCTTTGCAACCTTTCAGCTGGTCCTCTG<br/>TGTCTTGGCCACAACAGACAAAACACCGGACCGATGTCAAAGGCTCTGCACCCCTAGCCATT<br/>GGACTATCAGTGGGTTTAGGGCACCTGGTAGCAATCAGTTACACCGGCTGCGGCATCAACCC<br/>TGCTCGATCTTTTGGACCAGCCGTTATTCTTGAATCCTTTAAAACCACTGGATATACTGGATT<br/>GCACCCATGATCGGTGGGGTGGCTGCTGCTCTTGTGTATGACTTCTTGCTCTACCCAAAAAA<br/>GGAAGCGTTTGGCAAGCGTATGAAGGTTCTGAAGGGCACGGCTGATCCGGACGCCTCGGCG<br/>ACAGAACCCCTAATCGAACCCCGAACCCCGAGATCTGGGTCTGGAGGTCTGGGAGATGAGT<br/>AA</p> <p>MARELKSWSFWRVLAEFVGMTIFVFIGIASAIGNRHNRYPDQEVKVALAFGLAIATLAQSLGHI<br/>SGAHLNPAITLGLLVSCQISFFRAFMVIAQMLGAVLASGIMFKVSPDPDTTLGLNMLSNGVSQG<br/>QGFAIELFATFQLVLCVLATTDKHRSTDVKGSAPLAIGLSVGLGHLVAISYTGCGINPARSFPAVIL<br/>ESFKNHWIYWIAPMIGGVAAALVYDFLLYPKKEAFGKRMKVLKGTADPDASATEPLIEPTRPS<br/>GSGGLGDE</p> |
| Lw_Aqp3a<br>(OQ301585) | <p>GGGCTGGTCCTGGTCCATCGTGGCTATAAGAGCAGAGCCCTGGCCTTCACATGAGTATA<br/>CGTCTTTGAGGACATACCGTTTTTTTTTACACAGTCAGAGGAAGACATCAACACCCGGCTGA<br/>AAGATGGGTTGGCAGAAGGCCATGCTGGATAAGCTTGACATACTTTCCATATCCGCAACAA<br/>GCTGCTGCGCCAGGGATTGGCTGAGTGCTTGGGAACTCTCATCCTGGTGGTGGGTATTTCTC<br/>CTTAATCATAATTTAGTCACTTAATCACAACATCAGTAGTAATAGCATCAAAGGTGAGGTCGG<br/>TAGAAGTTAATAGAAATGCAGTTAGTCAAAATGGTCTGAAACAGCATGTTTGTGTCTCACATAA<br/>TCTGTAATATAAGATTTATTTTTTAGTGCAATGTTACATGTAGAGCATCAGCTGTGGAATTGCA<br/>CACTCTTGCTCTTCTCACTCAGATTGAGGAAAAAGTCAGGGTCTAATGGGCACTTTAGCACA<br/>TGCAAGAACTCACATTTTCCTTAAGCAATTAAGTGAATGATAGATTAATGCAAATTAGCATTTA<br/>AATCTGTACTATTGTGCACACAGTGGTGTGGAGTCTTACACAGATGTTACATTAGCATGTTTT<br/>AGTTTACTGCAACTGGTCTTCAGTCCAAAAGACAGTTCAAAATGTACTCAAAAATTACAATT<br/>CTGTTCAAATTGAAAAGTAAAAAAAAAAGAGTCATCCAAACCTGTGAGTTTCTTCTGTGGAA<br/>CACAAAATAAGTTTTTTTTTTTTTTTTTTTTTTTACAATTGAAACATACACGGTGAACCAA</p>                                                                                                                                                                                                                                                                                                                                                                                                                                                                                                                 |

|  |                                                                                                                                                                                                                                                                                                                                                                                                                                                                                                                                                                                                                                                                                                                                                                                                                                                                                                                                                                                                                                                                                                                                                                                                                                                                                                                                                                                                                                                                                                                                                                                                                                                                                                                                                                                                                                                                                                                                                                                                                                                                                                                                                                                                                                                                                                                                                                                                                                   |
|--|-----------------------------------------------------------------------------------------------------------------------------------------------------------------------------------------------------------------------------------------------------------------------------------------------------------------------------------------------------------------------------------------------------------------------------------------------------------------------------------------------------------------------------------------------------------------------------------------------------------------------------------------------------------------------------------------------------------------------------------------------------------------------------------------------------------------------------------------------------------------------------------------------------------------------------------------------------------------------------------------------------------------------------------------------------------------------------------------------------------------------------------------------------------------------------------------------------------------------------------------------------------------------------------------------------------------------------------------------------------------------------------------------------------------------------------------------------------------------------------------------------------------------------------------------------------------------------------------------------------------------------------------------------------------------------------------------------------------------------------------------------------------------------------------------------------------------------------------------------------------------------------------------------------------------------------------------------------------------------------------------------------------------------------------------------------------------------------------------------------------------------------------------------------------------------------------------------------------------------------------------------------------------------------------------------------------------------------------------------------------------------------------------------------------------------------|
|  | TAAAGGAAGTGTACTGTACTGCATTGTATTTTATTGAAAGTACATATGAATGATAAATATGCCC<br>TGAGGAACTATACTTAAAGGAAGTAATTTGCAAATAGACAAGAAAGAAGGGTAGATATAATC<br>TTAGTCCTGTTTCGTGAGAAAAACAAATGCTCTTGACATGCATGATAAACAGCAAAAAAAAAA<br>GTATTTTCAATATATATTTTCATGCAATTTTCTCTGTGACAAACGGCGCACGTAAGAACTAAGT<br>AATGCAGCTTGTATCAGGAAAGAAGCGCATACCAAAGCTTTTCGATGAATAGCACTTGTTTCA<br>TCACTTTCATTATAATACCACAATCCACGCGTGAGAAACAACATATGTTGAGGTTTAATGAAT<br>CATCTCAAGGCTTCAAGTGCATTTGCCACACCAATAACAAGGATTAATTTTTTTCTTATCCTAA<br>ACATGTAAAATCTATATTTTGGAAAGGTTTGACATTAATGGAACCATATTTAGTGGCTAGATAT<br>TTAGATATTCACCAGGATGAAAAATATATGTATTATTAACCTGACAGACCCACAATTCTCCAC<br>CAGTTTTTTACAGTCACAGAAATGTTCTCAAACATTGTGATAAACAGGATGTCTGGTAAATGC<br>ACCACACGTGGGAGACTATAAGTAACCGCCGTTGTAAGAGATCAGGGCTGTTTATGAATGAC<br>AGTCACATGAGGGGTATGAAATATGACTCTTGTTAAAGAGCACATTGACACCAAACCTGCTGC<br>TACAAAATGCTCTCAAGGCAATTATGTGATTTTACAAGCACTTTAGTAAAAACTTATTTCAAG<br>AATTACACTCATAGTTTGCTTTTAAGGTGGCCCGGGTTATATGAGAGATAATACTTGAATAG<br>AGAGGTCATGCGATAACTGGAACACTCAACAGGTGTGATGTTTGCTGTGTGGCAAAAGGTAT<br>TCGATGTTACTTTGAACACAGTCTTTGTCTGTGAAGGTCAGAATTGTAATATTGACTTTATCTG<br>CAAACGTTCTTCCCAGAGCAGAAACAGGAACCATTTCTCTTTGGTTACACAATAGGCTTACT<br>GTGAAGAAAAAAGGTTAAATAAAAAATGAATAACACAAGGAAATGTATTAGCATTTAACTGT<br>CATAACTGAAAACAAAAGGAAATACTTTTGGGGCCACGCTTAGGTGATCAATTGGTTTTGT<br>AGATGCCATTTTTAGGCCTGTGTTGACATTGTTGCGGAGATTTAACTTATGAAAGCTCTTCA<br>ATGCTTCCTGGCAATTACATGACTTTAGTATAGCCTTAGCTTGATTCTGATAATTTGATATAATG<br>CCACAGGTATTTATTCACACTCAGGTGACCTGTCAAATGGAACTTCAGCCACAAGTCTGAA<br>CAGCAACATGTAATTGCTCTCTGTGAGAAAGGACTTGTAATGACCTGTCTGAAATGTTCTATG<br>TGAAAATGTGCAGACCAAAGTCACTATAGATTTGTAGTGTTTCAACAAAAGGGAATACTTATT<br>TTATTTTTAGCAGAGTTTGAAACTGCAACCTGCTATTCTCATCACCAGTTTTAAGTATATGTTG<br>TGGCTCACAATTTGAATGCTTTGAAAGGCCTACTCTTAGATGGTAAAATGATTATTCATAGTG<br>CTGAAGGAAATGGCACGCTTGAAACAATGTGTGGTTTTTCAAACCGTAATTAACGCATGTTT<br>TTATTTACATCATTACAGATGTTTGGCTGTGGTGCAGTGGCTCAAGTGATACTAAGTGAAG<br>GATCTCACGGACGCTTTCTCACTATAAACCTTGCTTTTGGGTTTGCCGCTACCCTTGGAATCT<br>TGGTTTTCGGCCAGGTGTCAGGTAGGCAAACCTCTAAAATTGCATCTTAAGCTGTTGTTG<br>TGCATGGCTATAAAAACAGGACTGAGTTTTATAAAAAGATTCTTTGTGGATGACTTTTTTGTTT<br>TTTTACCTTTAGGCGGACATTTAAATCCAGCAGTTACATTTGCTCTCTGCCTCTTGGGACGTG<br>AAAAATGGAGAAAGTTCCCTGTGTACTTTCTGTTTCAAACGATTGGATCCTTCTTGGGTGCC<br>GCAATTATCTTTGCTGATTACCATGGTACATGTTATGCAATATTAATGTTCTTTCTTGTCAAAAG<br>TGTATATCATGGTTATCTTTTCTGACACTTAAATTTTTGTATTTTTTTTAGATGCAATGTATGAGT |
|--|-----------------------------------------------------------------------------------------------------------------------------------------------------------------------------------------------------------------------------------------------------------------------------------------------------------------------------------------------------------------------------------------------------------------------------------------------------------------------------------------------------------------------------------------------------------------------------------------------------------------------------------------------------------------------------------------------------------------------------------------------------------------------------------------------------------------------------------------------------------------------------------------------------------------------------------------------------------------------------------------------------------------------------------------------------------------------------------------------------------------------------------------------------------------------------------------------------------------------------------------------------------------------------------------------------------------------------------------------------------------------------------------------------------------------------------------------------------------------------------------------------------------------------------------------------------------------------------------------------------------------------------------------------------------------------------------------------------------------------------------------------------------------------------------------------------------------------------------------------------------------------------------------------------------------------------------------------------------------------------------------------------------------------------------------------------------------------------------------------------------------------------------------------------------------------------------------------------------------------------------------------------------------------------------------------------------------------------------------------------------------------------------------------------------------------------|

|  |                                                                                                                                                                                                                                                                                                                                                                                                                                                                                                                                                                                                                                                                                                                                                                                                                                                                                                                                                                                                                                                                                                                                                                                                                                                                                                                                                                                                                                                                                                                                                                                                                                                                                                                                                                                                                                                                                                                                                                                                                                                                                                                                                                                                                                                                                                                                                                                                                                                                                  |
|--|----------------------------------------------------------------------------------------------------------------------------------------------------------------------------------------------------------------------------------------------------------------------------------------------------------------------------------------------------------------------------------------------------------------------------------------------------------------------------------------------------------------------------------------------------------------------------------------------------------------------------------------------------------------------------------------------------------------------------------------------------------------------------------------------------------------------------------------------------------------------------------------------------------------------------------------------------------------------------------------------------------------------------------------------------------------------------------------------------------------------------------------------------------------------------------------------------------------------------------------------------------------------------------------------------------------------------------------------------------------------------------------------------------------------------------------------------------------------------------------------------------------------------------------------------------------------------------------------------------------------------------------------------------------------------------------------------------------------------------------------------------------------------------------------------------------------------------------------------------------------------------------------------------------------------------------------------------------------------------------------------------------------------------------------------------------------------------------------------------------------------------------------------------------------------------------------------------------------------------------------------------------------------------------------------------------------------------------------------------------------------------------------------------------------------------------------------------------------------------|
|  | <p> TTGCTGGAGAATCAAATCTGCTGCTTGTAAGTGGGCCAAAAGCCACTGCTGGGATTTTTGCT<br/> ACATACCCCAACCCTCATCTCACCATCTTAAATGGATTCTTTGACCAGGTCAGTAACTGCAGC<br/> TTGTAACATACTTAAACGAATTATAAAATCTCTCATTAACCATCAAAGACATCCTCTGTAATG<br/> ACTACATTTTTATTTGTAAATATTTCAATTATATAGTCTTTATATAATTACAGGGCACGACTATGA<br/> AATTACATGCCTTTAAAAATAATGAAAAATAGAATATTAGATGTAAATTAGTCTATCACCTAAGG<br/> GCACATAGTGAAGGTAAAAATAAACAAATACAAGGAAAAGTTTTTCAAGCAAAACATTTTTT<br/> TACCATCCCCATGTTTCAGTAGGACAGGGGTATCCAAACTCGGTCCTGGAGGGCCACTGTCT<br/> TGCAGAGTTTAGCTCCAACCTTGCTCAACACTCCTGCTTGGAAGTTTGTAGGATGCCTAGTG<br/> AGAGCTTGATTAGCTGGTTCAGGTGTGTTTAATAGGGGTGGAGCTAAACTTTGCAGGACAC<br/> TGGCCCTCCAGGAGCAGGATTGACACCCCTGCCTTAGGGGGTTCCGTAAAGTATAATGAATA<br/> TATTATTTTTATTATCTTATATGTTTTTGTACATAAACCATAAATATAACCATCTTCACAGGTGAT<br/> AGGCACTGCATCTCTTATTGTCTGCATCCTGGCCATTGTGGACCCCTACAACAACCCGATCCC<br/> CCAAGGTCTTGAGGCCCTTCACGGTGGGGTTCAGCATTCTGGTTCATTGGACTCTCCATGGGCT<br/> TCAATTCTGGTTATGCAGTTAACCAGCTAGGGATTTCGGGCCTCGTCTTTTCACCGCCATGG<br/> CTGGTTGGGGTGGTGAAGTCTTTACGTAAGTGTATACATTTAATTCCCATAACATGAACATATT<br/> ATGTACTGTGCAACGCTTTTCAAGTTTTTGTCTCTGTCAATAAAACTAATGAACTTTCTATT<br/> TTGTTTTGCAAAAGTACCAGACAGTGTGTTTTTGGTGCCCATCTTCGCCCCCTTCCTGGGA<br/> TCCATTATTGGTGTGATTGTGTACCAGCTAATGGTGGGGTGGCACGTGGAGGGAGAGGCACG<br/> GGACAAGAAGGATAAAGCTAGGGAAGAGTCTTTGAACTTAATGACGTCACCAGCAAGGAT<br/> TGATCTGCGTGAATTCCATCAGCCCTCCGTACCATAAATCCACATAAGCTTTCTGCTTATGAGT<br/> CTCTGGGTTCAGTGAATATGTCTTGTAACACACAAGACTCCCTCTTCTGTTTCAGAGCGGATT<br/> CTGATTGTCTTGCAGGCCATCAAATGGACTTTAAATGCTGAACATTTCTAGATTTCAAACCTT<br/> TGTTAATTGTTCCATCAAACATTGTTGTTATTCTTTTTTTTTTATAACAATGATTCTTTTTTTT<br/> TTTTTTCTTTTACACATCCTCCAGAAGGGAAAAAAGTGTTTCTTCAGCAACACGAATTATAT<br/> TAATTCAGTGTGTTGAAAAGTTAGTAACAATGTTTCATCTAGTAGTAGTTCTACTAAAAACAGG<br/> TACAATACTTAGCTTTCTTTCTTTCTTTTATTTTTTTTTTATTTTTCAGTGTAATATTTTTT<br/> ATTCTCATCTTCATTTAAAGCTGAATTTTTCTTATTACATTTTAGGGATTGCACTTAACGTAT<br/> GCATTTTAGGAAACATGTTACAGTCGTGTAGTAATCCTGACAATTGCATCATGATATTACAGTC<br/> TTAGACTAGTATCATCATCCTCTTCTGTATCTGTTAGTTTCTTAACCAATGTAATTGTGATTTA<br/> ATATTTTAAAGCAATTTATTGTTATTAATAAAGGTTTTTGTTTTAAAAGAAGTCTCACACTG<br/> TGAAGTTTTGTCATTTTTATGTTTAGTTGAAACCGCC<br/> ATGGGTGGCAGAAGGCCATGCTGGATAAGCTTGCACATACTTTCCATATCCGCAACAAGCT<br/> GCTGCGCCAGGGATTGGCTGAGTGCTTGGGAAGCTCTCATCCTGGTGATGTTTGGCTGTGGTG<br/> CAGTGGCTCAAGTGATACTAAGTGAAGGATCTCACGGACGCTTCTCACTATAAACCTTGCT<br/> TTTGGGTTTGCCGCTACCCTTGAATCTTGGTTTGCGGCCAGGTGTCAGGCGGACATTTAAAT </p> |
|--|----------------------------------------------------------------------------------------------------------------------------------------------------------------------------------------------------------------------------------------------------------------------------------------------------------------------------------------------------------------------------------------------------------------------------------------------------------------------------------------------------------------------------------------------------------------------------------------------------------------------------------------------------------------------------------------------------------------------------------------------------------------------------------------------------------------------------------------------------------------------------------------------------------------------------------------------------------------------------------------------------------------------------------------------------------------------------------------------------------------------------------------------------------------------------------------------------------------------------------------------------------------------------------------------------------------------------------------------------------------------------------------------------------------------------------------------------------------------------------------------------------------------------------------------------------------------------------------------------------------------------------------------------------------------------------------------------------------------------------------------------------------------------------------------------------------------------------------------------------------------------------------------------------------------------------------------------------------------------------------------------------------------------------------------------------------------------------------------------------------------------------------------------------------------------------------------------------------------------------------------------------------------------------------------------------------------------------------------------------------------------------------------------------------------------------------------------------------------------------|

|            |                                                                                                                                                                                                                                                                                                                                                                                                                                                                                                                                                                                                                                                                                                                                                                                                                                                                                                                                                                                                                                                                                                                                                                                                                                                                                                                                                           |
|------------|-----------------------------------------------------------------------------------------------------------------------------------------------------------------------------------------------------------------------------------------------------------------------------------------------------------------------------------------------------------------------------------------------------------------------------------------------------------------------------------------------------------------------------------------------------------------------------------------------------------------------------------------------------------------------------------------------------------------------------------------------------------------------------------------------------------------------------------------------------------------------------------------------------------------------------------------------------------------------------------------------------------------------------------------------------------------------------------------------------------------------------------------------------------------------------------------------------------------------------------------------------------------------------------------------------------------------------------------------------------|
|            | <p>CCAGCAGTTACATTTGCTCTCTGCCTCTTGGGACGTGAAAAATGGAGAAAGTTCCTGTGTA<br/> CTTTCTGTTTCAAACGATTGGATCCTTCTTGGGTGCCGCAATTATCTTTGCTGATTACCATGAT<br/> GCAATGTATGAGTTTGCTGGAGAATCAAATCTGCTGCTTGAACTGGGCCAAAAGCCACTGC<br/> TGGGATTTTTGCTACATACCCCAACCCTCATCTCACCATCTTAAATGGATTCTTTGACCAGGTG<br/> ATAGGCACTGCATCTCTTATTGTCTGCATCCTGGCCATTGTGGACCCCTACAACAACCCGATC<br/> CCCCAAGGTCTTGAGGCCTTCACGGTGGGGTTCAGCATTCTGGTCATTGGACTCTCCATGGG<br/> CTTCAATTCTGGTTATGCAGTTAACCCAGCTAGGGATTTCTGGGCCTCGTCTTTTCACCGCCAT<br/> GGCTGGTTGGGGTGGTGAAGTCTTTACTACCAGACAGTGTTGGTTTTTGGTGCCCATCTTCG<br/> CCCCCTTCTGGGATCCATTATTGGTGTGATTGTGTACCAGCTAATGGTGGGGTGGCACGTGG<br/> AGGGAGAGGCACGGGACAAGAAGGATAAAGCTAGGGAAGAGTCTTTGAACTTAATGACG<br/> TCACCAGCAAGGATTGA</p> <p>MGWQKAMLDKLAHTFHIRNKLLRQGLAECLGTLILVMFGCGAVAQVILSEGRFLTNLAFG<br/> FAATLGILVCGQVSGGHLNPAVTFALCLLGREKWRKFPVYFLFQTIGSFLGAAIIFADYHDAMYE<br/> FAGESNLLLVTGPKATAGIFATYPNPHLTILNGFFDQVIGTASLIVCILAIWDPYNNPIQGLEAFTV<br/> GFSILVIGLSMGFNSGYAVNPARDFGPRLFTAMAGWGGEVFTTRQCWFLVPIFAPFLGSIIGVIVY<br/> QLMVGWHVEGEARDKKDKAREESLKLNDVTSKD</p>                                                                                                                                                                                                                                                                                     |
| Lw Aqp3ap1 | <p>AGTCAGAGGAAGACATCAACACCCGGCTGAAAGATGGGTTGGCAGAAGGCCATGCTGGATA<br/> AGCTTGACATACTTTCCATATCCGCAACAAGCTGCTGCGCCAGGGATTGGCTGAGTGCTTG<br/> GGAATCTCATCCTGGTGATGTTTGGCTGTGGTGCAGTGGCTCAAGTGATACTAAGTGAAGG<br/> ATCTCACGGACGCTTTCTCACTATAAACCTTGCTTTTGGGTTTGGCGCTACCCTTGGAATCTT<br/> GGTTTGGCGCCAGGTGTCAGGCGGACATTTAAATCCAGCAGTTACATTTGCTCTCTGCCTCTT<br/> GGGACGTGAAAAATGGAGAAAGTTCCTGTGTACTTTCTGTTTCAAACAATTGGATCCTTCT<br/> TGGGTGCCGCAATTATCTTTGCTGAATACCATGATGCAATGTATGAGTTTGCAGGAGAATCAA<br/> ATCTGTTGCTTGTAACCTGGGCCAAAAGCCACTGCTGGGATTTTGGCTACATACCCCAACCCTC<br/> ATCTCACCATCTTAAATGGATTCTTTGACCAGGTGATAGGCACTGCATCTCTTATTGTCTGCGT<br/> CCTGGCCATTGTGGACCCCTACAACAACCCGATCCCCCAAGGTCTTGAGGCCTTCACAGTGG<br/> GGTTCAGCATTCTTGTCAATTGGACTCTCCATGGGCTTCAATTCTGGTTATGCAGTTAACCCAG<br/> CTAGGGATTTCTGGGCCTCGTCTTTTACCGCCATGGCTGGTTGGGGTGGTGAAGTCTTTACTA<br/> CCAGACAGTGTTGATTTTTGGTGCCCATCTTCGCCCCCTTCTGGGATCCATTATTGGTGTGAT<br/> TGTGTACCAGCTAATGGTGGGGTGGCACGTGGAGGGAGAGGCACGGGACAAGAAGGATAA<br/> AGCTAGGAAAGTCTTTGAACTTAATGACGTCAACCAGCAAGGATTGATCTGCGTGAATTCCA<br/> TCAGCCCTCCGTACCATAAAATCCACATAAGCTTTCTGCTTATGAGTCTCTGGGTTCAAGTGAAT<br/> ATGTCTTGTACCACACAAGACTCCCTCTTCTGTTTCAGAGCGGATTCTGATTGTCTTGCAGGC<br/> CATCAAATGGACTTTAAATGCTGAACATTTCTAGATTTCAAAGTTTTGTTAATTGTTCCATCAA<br/> ACATTGTTGTTATTCTTTTTTTTTTATAACAATGATTCTTTTTTCTTCTTTTTTTCACACATT</p> |

|            |                                                                                                                                                                                                                                                                                                                                                                                                                                                                                                                                                                                                                                                                                                                                                                                                                                                                                                                                                                                                                                                                                                                                                                                                                                                                                                                                                                                                                                                                                                         |
|------------|---------------------------------------------------------------------------------------------------------------------------------------------------------------------------------------------------------------------------------------------------------------------------------------------------------------------------------------------------------------------------------------------------------------------------------------------------------------------------------------------------------------------------------------------------------------------------------------------------------------------------------------------------------------------------------------------------------------------------------------------------------------------------------------------------------------------------------------------------------------------------------------------------------------------------------------------------------------------------------------------------------------------------------------------------------------------------------------------------------------------------------------------------------------------------------------------------------------------------------------------------------------------------------------------------------------------------------------------------------------------------------------------------------------------------------------------------------------------------------------------------------|
|            | <p>CCAGAAGGGAAAAAGGTGTTTCTTCACACATCCTCCAGAAGGGAAAAAGGTGTTTCTTCAG<br/>CAACACGAATTATATTAATTCAGTGTGTTTAAAAAGTTAGTAACAATGTTCTACTAAAAACAGG<br/>TACAATACATTATTTCTGTGATTGTAAGTAGTCATTTAATTAATAATATGATATCTATATAAAATGT<br/>TTGTTTTGTACGCTGTGTTGTTAAGCGTCTCGTTAGTGTCGTTTTAACCCTTGTATGGTGTTCG<br/>GGTCTTTAGGACCCGGTTTTCATTTTTTATCAAGAGAAAAATTATACGATTAATAATTTTTTCAA<br/>ACTCAGACTCATTGGCCTTGGCTCATTTTTCTGTGA</p> <p>ATGGGTTGGCAGAAGGCCATGCTGGATAAGCTTGCACATACTTTCCATATCCGCAACAA<br/>GCTGCTGCGCCAGGGATTGGCTGAGTGCTTGGGAACCTCTCATCCTGGTGATGTTTGGCTGTG<br/>GTGCAGTGGCTCAAGTGATACTAAGTGAAGGATCTCACGGACGCTTTCTCACTATAAACCTT<br/>GCTTTTGGGTTTGCCGCTACCCTTGGAATCTTGTTTGGCGCCAGGTGTCAGGCGGACATTTA<br/>AATCCAGCAGTTACATTTGCTCTCTGCCTCTTGGGACGTGAAAAATGGAGAAAGTTCCTGT<br/>GTACTTTCTGTTTCAAACAATTGGATCCTTCTTGGGTGCCGCAATTATCTTTGCTGAATACCAT<br/>GATGCAATGTATGAGTTTGCAGGAGAATCAAATCTGTTGCTTGTAAGTGGGCCAAAAGCCAC<br/>TGCTGGGATTTTTGCTACATAACCCCAACCCTCATCTCACCATCTTAAATGGATTCTTTGACCAG<br/>GTGATAGGCACTGCATCTCTTATTGTCTGCGTCTGGCCATTGTGGACCCCTACAACAACCCG<br/>ATCCCCCAAGGTCTTGAGGCCTTCACAGTGGGGTTCAGCATTCTTGTCATTGGACTCTCCATG<br/>GGCTTCAATTCTGGTTATGCAGTTAACCCAGCTAGGGATTTCGGGCCTCGTCTTTTACCGCC<br/>ATGGCTGGTTGGGGTGGTGAAGTCTTTACTACCAGACAGTGTGA</p> <p>MGWQKAMLDKLAHTFHIRNKLLRQGLAECLGTLILVMFGCGAVAQVILSESGHGRFLTINLAFG<br/>FAATLGILVCGQVSGGHLNPAVTFALCLLGREKWRKFPVYFLFQTIGSFLGAAIIFAEYHDAMYE<br/>FAGESNLLLVTGPKATAGIFATYPNPHLTILNGFFDQVIGTASLIVCVLAIVDPYNNPIPQGLEAFT<br/>VGFSILVIGLSMGFNSGYAVNPARDFGPRLFTAMAGWGGEVFTTRQC</p> |
| Lw Aqp3ap2 | <p>ATGTTTGGCTGTGGTGCAGTGGCTCAAGTGATACTAAGTGAAGGATCTCACGGACGCTTTCT<br/>CACTATAAACCTTGCTTTTGGGTTTGCCGCTACCCTTGGAATCTTGGTTTGGCGCCAGGTGTC<br/>AGGCGGACATTTAAATCCAGCAGTTACATTTGCTCTCTGCCTCTTGGGACGTGAAAAATGGA<br/>GAAAGTTCCTGTGTACTTTCTGTTTCAAACAATTGGATCCTTCTTGGGTGCCGCAATTATCT<br/>TTGCTGAATACCATGATGCAATGTATGAGTTTGTCTGGAGAATCAAATCTGTTGCTTGTAAGT<br/>GGCCAAAAGCCACTGCTGGGATTTTTGCTACATAACCCCAACCCTCATCTCACCATCTTAAATG<br/>GATTCTTTGACCAGGTGATAGGCACTGCATCTCTTATTGTCTGCGTCTGGCCATTGTGGACC<br/>CCTACAACAACCCGATCCCCCAAGGTCTTGAGGCCTTCACGGTGGGGTTCAGCATTCTTGTC<br/>ATTGGACTCTCCATGGGCTTCAATTCTGGTTATGCAGTTAACCCAGCTAGGGATTTCGGGCCT<br/>CGTCTTTTACCGCCATGGCTGGTTGGGGTGGTGAAGTCTTTACTACCAGACAGTGTGTT<br/>TTTGGTGCCCATCTTCGCCCCCTTCCTGGGATCCATTATTGGTGTGATTGTGTACCAGCTAATG<br/>GTGGGGTGGCACGTGGAGGGAGAGGCACGGGACAAGAAGGATAAAGCTAGGGAAGAGTCT<br/>TTGAAACTTAATGACGTCACCAGCAAGGATTGA</p>                                                                                                                                                                                                                                                                                                                                                                                                                                                                                                                                                                                                                          |

|                        |                                                                                                                                                                                                                                                                                                                                                                                                                                                                                                                                                                                                                                                                                                                                                                                                                                                                                                                                                                                                                                                                                                                                                                                                                                                                                                                                                                                     |
|------------------------|-------------------------------------------------------------------------------------------------------------------------------------------------------------------------------------------------------------------------------------------------------------------------------------------------------------------------------------------------------------------------------------------------------------------------------------------------------------------------------------------------------------------------------------------------------------------------------------------------------------------------------------------------------------------------------------------------------------------------------------------------------------------------------------------------------------------------------------------------------------------------------------------------------------------------------------------------------------------------------------------------------------------------------------------------------------------------------------------------------------------------------------------------------------------------------------------------------------------------------------------------------------------------------------------------------------------------------------------------------------------------------------|
|                        | <p>ATGTTTGGCTGTGGTGCAGTGGCTCAAGTGATACTAAGTGAAGGATCTCACGGACGCTT<br/> TCTCACTATAAACCTTGCTTTTTGGGTTTGCCGCTACCCTTGGAATCTTGGTTTGC GGCCAGGT<br/> GTCAGGCGGACATTTAAATCCAGCAGTTACATTTGCTCTCTGCCTCTTGGGACGTGAAAAAT<br/> GGAGAAAGTTCCCTGTGTACTTTCTGTTTCAAACAATTGGATCCTTCTTGGGTGCCGCAATTA<br/> TCTTTGCTGAATACCATGCCACTGCTGGGATTTTTGCTACATAACCCCAACCCTCATCTCACCAT<br/> CTTAAATGGATTCTTTGACCAGGTGATAGGCACTGCATCTCTTATTGTCTGCGTCCTGGCCATT<br/> GTGGACCCCTACAACAACCCGATCCCCCAAGGTCTTGAGGCCTTCACGGTGGGGTTTCAGCAT<br/> TCTTGTCATTGGACTCTCCATGGGCTTCAATTCTGGTTATGCAGTTAACCCAGCTAGGGATTT<br/> CGGGCCTCGTCTTTTCACCGCCATGGCTGGTTGGGGTGGTGAAGTCTTTACTACCAGACAGT<br/> GTTGGTTTTTGGTGCCCATCTTCGCCCCCTTCTGGGATCCATTATTGGTGTGATTGTGTACCA<br/> GCTAATGGTGGGGTGGCACGTGGAGGGAGAGGCACGGGACAAGAAGGATAAAGCTAGGGA<br/> AGAGTCTTTGAACTTAATGACGTCACCAGCAAGGATTGA</p> <p>MFGCGAVAQVILSESGHGRFLTINLAFGFAATLGILVCGQVSGGHLNPAVTFALCLLGREKWRKF<br/> PVYFLFQTIGSFLGAAIIFAEYHATAGIFATYPNPHLTILNGFFDQVIGTASLIVCVLAIVDPYNNPIP<br/> QGLEAFTVGFSILVIGLSMGFNSGYAVNPARDFGPRLFTAMAGWGGEVFTTRQCWFLVPIFAPFL<br/> GSIIGVIVYQLMVGWHVEGEARDKKDKAREESLKLNDVTSKD</p>                                                                                                                                                                                                                                                                        |
| Lw_Aqp3b<br>(OQ301586) | <p>GTTACCCAGTGCCCTTCATCCTCATCATTAAACCCCATCATCGTCTTTAAATTATCCTAAGGCA<br/> TTATGGGAAGACAGAAGGTGCTTCTGGAAGAGATGTCTCGGACCTTGCAGGTGCGGAACAT<br/> GCTGATGCGACAGGCACTGGCAGAATGTCTTGGCACCCCTCATTCTAGTGGTGAGACACTTTT<br/> GTTGTTTTTGTCAATTGATGAGTCAGTGATGAGACGTATCGATTTCAGCTATGATGAAAAAACC<br/> ATGTGTCTGTTTTGGATCCTTATTGTAAAGCAGTTTATTCATTTTGAGAGGAACGATTGTAAAC<br/> GTTTAAAAAGTGTTACCATCCAGGAATGTGGCTATATATGATTTGCAGGTGTTGAGGTTTGGA<br/> CACATTTATGTGTTTATACTCTATAGAAGCACATTTTCTATAGTTTTCTGTTTTTTATTATACTTC<br/> AAAATATACGTATTAAATGTGAATCATGTATTAATAAAGCACTAAGCTTGATAGATGGACGAT<br/> AAATCAATCAATAATGATTCAAAGATTGATTTATTGTCTATCTTTGATGAGAATGTGGAAGGG<br/> ATACATGCATGTAAGACATCAAAAAATAATCTATATGCTTTCATCTGCTGAAAAGCCTGAAATTT<br/> CCATTTAGCTACAAC TGAAAGGAGTTTTACTTCTTTATCACTTGCCAGCTGAGTTCCTCATTTT<br/> GCAAATTATTTGCAGAGAGATGTTTTATGTTCTCTTTTGCCAACCCTTTTATAATAATATAATAA<br/> TAATAAGTATTTGTTATGCTTTATACTTATATGTACTTATACTTTATCCACTTTTCTATACTCATAT<br/> TGGTTTTTTTTGTGTGTGTGTGGGGGGGGGGGGGGGGGGTCTCTCTCTGCTTTGGACAATAATG<br/> GTTATTAACCATGGAATTAATGAATGTTCAAAGCTAAAAATAAGTTTTAATGTTGTAACATTC<br/> TG TAGCAAAATGTCTCCATTGCAGAACTGACTGTGAGATGACATAATGGGAGTTGAATTCCA<br/> AGTCCTGCTGATAGCCAATTAGCTGCTTTACACAAGTTTCAGACACTTTACAGTGGGCCATTT<br/> CATGTCCTAGGCCCAGTTGTTGAGTTCATGTAAC TATTATGCAGAACCGGATATCACCAAGTG<br/> CAACATGTTCCCTGGATCAACATCCATATCCCCTACCCCTAAACCTACCCATAAGTTATCCCTAAA</p> |

ATCAAAGGGAAATTAATTAATGAAGCACCTAACCCCTGGTGTAAAGCCTAAACTTGACATAA  
AGTGTCAACTTGCCCCTCAAATCTGATTGGTTGATGTTGAATGTTGAATGTTGTTCCAGGGTC  
GACAAATATGTGAAAAAAGTTATTCTGGAACAATATTTCCAGTTGTGGTGTGCAGATCAGTAT  
ATTTCCATTAGATTCCCAGCACTCCACCTCTGGCGGGCTTTAAAGATTGAGATTGAATGCTAG  
AATAAAATTATCGGACAGGAATGTTGTTCCAGCATCAACAAAATGTTGACCCATGAGCGCCT  
CTAACTCAGCAAAATCAGGACGTGCTAACTAAGATACTTTATCACTGAAATTGCTTCAACTCA  
AGCAACAGGCTCTGAAAAATAAGAAGCTGTAAAAAGTGATCAGTTGACTTAACTTAAAAA  
AAGTGAGGAAACCCGTTGCCTTAAAATTTAAGTAAATAAACTTCATGCATAATTGAAAAAAT  
TAGTTATGTGGAATTGTCAAGTTCACATAACTTAATTTTTTCAATTACGCATGAAGTTTGTTAC  
TTAATAATTTTAAGGCAATGGGTTTCTCACTTTTTTTAAGTAAAGTCAACTGATCACTTTTTA  
CAGCTTCTTATTTAAAAAAGAAAGAAAAATAAGGCAGGTCGGTCACAACACATGGTCAGGG  
CCATGACAATTAATAACATTTTACCTTAAATTCCCAGTCTAATTAACCACTGAACCATTGAA  
AATATTGTGTTTTGTTAGAATTAGACATCTCCGATTGAGGCTGTTAATTTGTTGCTCTTCTACT  
AAAGCTCAAGAGAAAAGCTGTTGCTACTGAGACAAATTTTCACTTCAACAGAACAAATATAAT  
ATTATATATTTTATATCATCACCTGGTAAAACATCTCGTATTGTTGTACTTTGTGCAACTACAAC  
GCAATTAGCAGGTAAGCAAAAGCAACAAGAGTTGCACAACAGTGTCGACAATTTAGAATTC  
AAGACAGCCCTTATCCGGAATAAATTTGACACAGCACAGGGGGATCACAGGTAAACCATAT  
CTCATCATCTGTTTTTCAATTTGAAAATAAGACTCAATATCTGTAGAAAAATAGAGCTCCCCAA  
GCCCATCTGTTGTTTTCTGATGGTACTGTGCGGTCTGAAACACACACCCCCCCCCCCCCCCCC  
CCCCCCCCCCCCCCCCCATTGAGAGGCTGATCATGCGACTCAATAACGGCTGGCAAAAACA  
GACAGGCTAGAGGGCATTACACAATGGAAGAGAGGGCAAGTACACACATACTCATACACAC  
ATTATCTATCAAATCCACATGATGCACATAACGTTTTGCATTCTTCCAGCAGTCCTCGAAGAA  
AAACAGGTATGTGAGGCCAAGGATGTCTAGCTCTGCGGAATACGTCAAACATAAACCTGCA  
ATCATTCAATGATGGCTCAGACCTTGCAGGTCAATTTTCAATTAATTTGAGGTTTATTTGCTGAAA  
TTCTATTCTAATCTATAGCTTAATTAACTTTGTTAGGTGTCTAGCTTAGCTTCGCCATCATATGT  
TTGATGTGCAGTCACACAAAAGACAAAAACTGAGCAAATGGTTAATTGGATTTCATTTAAC  
TTAATCTTAATGTCTCCATTTACAGATGTTTGGCTGCGGTGCTGTCGCCCAGTTGGTTTTAAGC  
GGAGGCTCTCATGGAATGTTTCTGACGGTGAATTTTGCAATTTGGGTTTGCCGCTATGTTGGGA  
ATCCTAGTTTGTGGGCAAGTCTCAGGTAACGTTGGTCATAAGCTTCTTAAAACCTGTCAGATTT  
ATTTTTTTTTTCTGGGAGAACACAGGAAATTTGAGAAATTCAGATGTGACATTTTGAAGCAGT  
GAGTCACATACAGCTCAGAACCACATATTAACACGTCAAGGCTTTGAGCCAAACATTCACCA  
GATGGATTTAAACAGGCAAAATTATACTACATTTCTTTTCTACATTTAGAACATTTTATTTTCTAG  
ATATTATTGGGTGGAATCAAGGGTTGACTCATGGTTAAAGTTCACTCAGATGGATGAACTACC  
TGGAACATCCAGTTCCATTTTTGATGAAAAACCAGAACAAATATCAGACAATATCAACTGGCA  
GTTTTGACTTTAACATTTTAAACAGAGAATAATGAAAAGAAATGAGAGTTTGGACTATGAA

GTCTTGGACTATAAGTGAAGTCTTGAAAGAAGCGGCAGACAGTTGAAAAACAAAGTTCCCA  
GACATAGATTAAGCCTAAAACCCATGGCTAAAAAGGTTATGAAAATGTTTAAGTTGAATTATT  
GAAGTTTAATCCTGGTTTAGGCTTAATAAGCATGTACCAAACCAGCCATAAAAAGTGTAATG  
AGAGTCTATAGCATTGTGTCATTGTGCTATTGTGTTCTGTGAAGATCTCATTTCAAATGTATCGTA  
AGATCGACATGTTGAAACTTTGTATTTTACAGGAGGTCACATAAACCCCACTGTGACCTTTGC  
CCTCTGTTTGTGTTGGGGAGAGAGCCCTGGAGGAAATTTCCCGTTTACTTCCTGGCCCAGACTC  
TGGGGGCTTTTCTTGGCTCAGGAATAATATTTGGCATGTATATTGGTGGGTTTGAGGATTGTTA  
AAGTATTTTGGTAGTCAATAATCCACATTTTTGTGTCAGTCCACATCCTTCGTCAGTCTGTTGCAG  
CCAACACTGAACTGCTCAGTTTATGAAGATGTTTCTATAACTAATGCTCACTTGATGCTTTG  
CAGATGCAATTTGGGACTTTGGACACGGTCTCTGATCGTTGTAGGGGACAATGCAACAGCT  
GGAATCTTTGCTACATAACCTTCCAAACACCTTACTTTGCTCAACGGCTTCTTCGATCAGGTA  
AGACCCAGAAATCAGCATTGTGTTGAAAATATTTTAAAGAATGTCCCAGTGATTGTCCATACAA  
TGAAAGTGAATGGGGTCCGATGTTGTTTTGGACCCCATGACTTTCATTGTATATGGACAAAA  
ACAGTTGAAACAATCTTTAGAATATTATCTTTTGTGTCACACAGAAGAAAGAAAGTCACTTTT  
GGAAAAACATGAGGGTGAGTAAATGTTGTCAGAATTTTCATTGAGTGAAGTGTCCCTTGCTT  
TCAACACAGATAATTGGCACGGCAGCTCTGATTGTGTGTATCCTTGCCATTGTTGACCCTTAC  
AATAACCCCATCCCACGAGGACTGGAGGCCTTTACTGTGGGCTTTGTGGTTCTGGTGATTGG  
TCAGTCCATGGGTTTTAACTCGGGTTATGCTGTAAACCCAGCAAGAGACTTGGGACCTCGGA  
TCTTCACTGCAATTGCTGGATGGGGCTCAGAGGTGTTCTCGTAAGTCACATATGGTTTACTAT  
ATACATTTCTTTCCATCCATTTCACTATTGAAATCATCTCAAACACTGATATATGTTTCATTAC  
CACAGTGCAAACCTCTTACTGGTCCTTTGTGCCAATCTTTGCCCCATTCAATTGGTGCCGTGTTT  
GGTGTGATGGTGTATCAGCTGATGGTGGGATGCCATGTGGAAGGAGAAGAAAGAGACAAAA  
GGGAAGCAGTGGAAAGAGAACAGACGGACAGACTCAAACACTCACTGCTGTTTCTGAGAAGG  
AGACAGCATAAGTCTGGGGTCAAATGGAGTAATTTTTGAGTTTAGCCTCTAAGAATAAATTCA  
GCTTTCATGACAATATAGCAGCAAAATTGTGTATTTTTGCACATTTTCGACTGGCAAGATCCA  
CATTAAATCATAACTTTGGATATCTACTAGACGGATGTGCCCTTGTGTCATCATGATACGAGTCAA  
GTCAAGTCAAGTCACCTTCATTTATATAGCGCTTTTAAACAATATGGACTGTTTCAAAGCAGCT  
TTACAATGATAATAGGAAATTAAAGTAACAGAGATTGTTTTGGCTTTACAGTAGCTCTACAAT  
AAAGTTATTGTCCAGCTAAAGTTAGTTTTGATCGATTCAATTCTGTTGCAAAAATCATTAGTTA  
TTAACTTAGGGGCCGCTTACACGACACCGTTCTAACAGAAAACCATTAACATGCTCCGGCCG  
CTCATCCGCACAACAACAGTGGTGGCTCGAGAAAGCAAACCTTGAAATAGGTTCCAAGGTG  
CAAGCCTCGAAGAAAATATATACTCAAACATAATTAGTCATATTTTTGTACTGCATGCACAAT  
TAGTTGATATCCAAACAATTTAATTGGAGAATCGTAATTTACATATCACTCTAATGATCCTGATC  
AGAACCTTTGTGTTTTATACATAAACTTAATTATCCTTTTCCATTTATCAAAAAAAGCCAAATT  
AATGAATCCAATCTGCTAACAAAGTCAGCTGTTGTCACCCATTCAATTTATCTCTAATGCTTCTAT

|                        |                                                                                                                                                                                                                                                                                                                                                                                                                                                                                                                                                                                                                                                                                                                                                                                                                                                                                                                                                                                                                                                                                                                                                                                                                                                                                                                                                                                                                                                                                                                                                                                                                                                                                                                            |
|------------------------|----------------------------------------------------------------------------------------------------------------------------------------------------------------------------------------------------------------------------------------------------------------------------------------------------------------------------------------------------------------------------------------------------------------------------------------------------------------------------------------------------------------------------------------------------------------------------------------------------------------------------------------------------------------------------------------------------------------------------------------------------------------------------------------------------------------------------------------------------------------------------------------------------------------------------------------------------------------------------------------------------------------------------------------------------------------------------------------------------------------------------------------------------------------------------------------------------------------------------------------------------------------------------------------------------------------------------------------------------------------------------------------------------------------------------------------------------------------------------------------------------------------------------------------------------------------------------------------------------------------------------------------------------------------------------------------------------------------------------|
|                        | <p>CTGTATAATGAATAATTATGAATAAGGGATATGATTTATGAAAATCTTCACCCTTATGAATACTG<br/>CATCAAAATCATGAAAATACCTGTTTTACTTCCATTCCAAATTTATTATCAGTGAATATTAATGA<br/>GTAATTATGCAGTGAGAAATTCAGGTCTGTTTACATTGTTGGGAATGTATTTGTTTTGCAAGTA<br/>TATATTTTGTGTCATTATGTGCTTGTCTCTGTTCTGGGAAAATTACAATGAGTTTACTCTGACT<br/>ATATGCATATAATATTTTGTGCTCATTTATATTGTGCTCTTTAAAAATAAACTGCATTTTGGTAA<br/>GG</p> <p>ATGGGAAGACAGAAGGTGCTTCTGGAAGAGATGTCTCGGACCTTGCAGGTGCGGAACA<br/>TGCTGATGCGACAGGCACTGGCAGAATGTCTTGGCACCTCATTCTAGTGATGTTTGGCTGC<br/>GGTGCTGTCGCCCAGTTGGTTTTAAGCGGAGGCTCTCATGGAATGTTTCTGACGGTGAATTT<br/>TGCATTTGGGTTTGCCGCTATGTTGGGAATCCTAGTTTGTGGGCAAGTCTCAGGAGGTCACAT<br/>AAACCCCACTGTGACCTTTGCCCTCTGTTTGTGGGGAGAGAGCCCTGGAGGAAATTTCCCG<br/>TTTACTTCCTGGCCCAGACTCTGGGGGCTTTTCTTGGCTCAGGAATAATATTTGGCATGTATAT<br/>TGATGCAATTTGGGACTTTGGACACGGTTCTCTGATCGTTGTAGGGGACAATGCAACAGCTG<br/>GAATCTTTGCTACATACCCTTCCAAACACCTTACTTTGCTCAACGGCTTCTTCGATCAGATAAT<br/>TGGCACGGCAGCTCTGATTGTGTGTATCCTTGCCATTGTTGACCCTTACAATAACCCCATCCC<br/>ACGAGGACTGGAGGCCTTTACTGTGGGCTTTGTGGTTCTGGTGATTGGTCAGTCCATGGGTT<br/>TAACTCGGGTTATGCTGTAAACCCAGCAAGAGACTTGGGACCTCGGATCTTCACTGCAATT<br/>GCTGGATGGGGCTCAGAGGTGTTCTCTGCAAACCTTACTGGTCCTTTGTGCCAATCTTTGCC<br/>CCATTCATTGGTGCCGTGTTCCGGTGTGATGGTGTATCAGCTGATGGTGGGATGCCATGTGGAA<br/>GGAGAAGAAAGAGACAAAAGGGAAGCAGTGGAAGAGAACAGACGGACAGACTCAAACCT<br/>CACTGCTGTTTCTGAGAAGGAGACAGCATAA</p> <p>MGRQKVLLEKMSRTLQVRNMLMRQALAECLGTLILVMFGCGAVAQLVLSGGSHGMFLTVNFA<br/>FGFAAMLGILVCGQVSGGHINPTVTFALCLLGREPWRFKPVYFLAQTLAGFLGSGIIFGMYIDAI<br/>WDFGHGSLIVVGDNATAGIFATYPSKHLTLLNGFFDQIIGTAALIVCILAIVDPYNNPIPRGLEAFT<br/>VGFVVLVIGQSMGFNSGYAVNPARDLGPRIFTAAGWGSEVFSANSYSFVPIFAPFIGAVFGVM<br/>VYQLMVGCHVEGEERDKREAVEREQTDRCLKLTAVSEKETA</p> |
| Lw_Aqp4b<br>(OQ301587) | <p>TAGATAGATAGATAGATAGATAGATAGATAGATAGATAGATAGATAGATAGATAGATAGAT<br/>AGATAGTTTTGCCTTTGATGGTCTGTAAGGCTGTGTGCGATACCATGAGGCGAGTGCTGCATG<br/>TGTGAGTGGTGTGTGCTACTGGTCTAGTCAGTGCTGTCAGATCAATTGTGCCGAAAGCTTCA<br/>TCTCTCTGTGCTTTGGTCTCTCCGCTCTGATTTGACCATGAAGAGCCGGTAACATAACACTGA<br/>GAGAGGAGCACACTGAGCTGCCAGACTGTCTGAGGAAGGCATGACAAGCTGTGGAGCCCT<br/>GGACAGATTCAGGTGAGTTCAAGAGCAAGTGCTAGATCACTAGCATGCTATAACTGTATATTT<br/>GTATTTGTCTTGTGCGGTTTCAATTTATATTCTGTATTATGAACACCTACATGTTTAGGTGCCTTGAT<br/>GCTTTAAAAAATATATATGTTCAAATGTACAGTAAATAAAATGTGCAGAAATATGATGTAC<br/>TGATCTCTTAATTTAAAATAATATTGCATTGGCGGATAAATATTTGCCTATAAAGAGTCTGCAG</p>                                                                                                                                                                                                                                                                                                                                                                                                                                                                                                                                                                                                                                                                                                                                                                                                                                                                                                                                                                                                                                                                                       |

TTTAGAACTTGATTTTTTGTTCATGTTTGTCCAGTTTATTGAAAATAGAAAATGTTTCTATAT  
GAGCTCACTATCTGATGTATGAGGTTCAAACACAGTTCCCTCCATAAATCAAGATAAACAAG  
GACATAGATATAAATATACCTAAGGAGTGTA AAAATGTAATGCCATAATATGAATTAGGCAGAC  
AAGTGCACCCTGATTATAATCTGGCATTCTTGAGGCCCATCAGTTCATTTTCAACCACTTTTTA  
AAGTCCTGATGTGCTTGTTTGTGTTGTTTGTGTTGTTTGTGTTGTTTGTGTTGCTTATTATTAGG  
CCTACTTATTTATACTGCTGTTGTTGTTAAGTACAACCAACTTGAGGTTTAAGTCATTTCAAT  
TTATATTAGGCTATTA AACTGACTTAAAAAATTAGTTGATCTTGTATTAACTTAAACGTATTTA  
ACTTATTTAAAAAAGCTAAACATTGTTGAACTTAACATTGAGTTAAAGCAATGTAAAAA  
CATTTGTTGTCATAACTTATTGATCATATAATTTGTTACAGTGTTTAGTTAGAGTCTCGTGCACC  
GCTCATGGAGGAAGGAGTGTAAGCTTACTGTCGTTATGAAAAAGCACGACGCAAAGGCAC  
ATAACAGCGAGTAGTTTCATGTGGTCGTGTTTAATTGAACTTAATAGTTTTGATCGGCGCACC  
GGGGAACGCGCGCGTGAGCGTGTGTGTGTGTGTGTGTGTGTGTGTGTGAATCAGAGGG  
AGGAGATGCAGAACAACACGCAGACTCACACACATATTGATCATTAATGAGCACGCGCTGT  
AACTGATCATCACACCTATCCTGTGGTTCAGATGTCTTGTGTTGAGGTAGACTTCTCCCACTGA  
GAGGATGCTTGTT CAGGGATGAGAAAGGCGTTTTTCGCGGGTCTCGGTTCCCTAACAGAAGTC  
GTGGCTTTCTTCGGTAAGTTAGTTTGTTGATTTTGCCTCCATAGTAAGAAGTTTTGGTTGTAA  
AGTGATGTTTTTGTATTGATCACACGGGGTTAAATGTT CACATGACGTTTAGTTGGCTTCA  
CCTGCCAGGCAAGGCAACACATCCCTGATCCCCGAAATGAACGTTTAAAATCATCCAATCAT  
CGTCATCTTATTGCATAGAGAACCGTTTAATGTAAACTGCGACAGAAGTGTTTATCAGTTTAC  
CCAAAATTCCATAGTCATATTTTCACTTGCTGTTCTGGATTATTGCATAGCCTACTATTTAAAC  
CAGTCTAAGATGTTTTGTTGGTCTTAGCTAGTTGGGTTTTTTTCGAGTAGGGATGTAAAAGCCT  
ATAATCAATTAATGGATATTCTTCAAAAAACTAAGAAGCATCTGAATCTTCTGCATATGGTTAA  
AGGAATAACATCAGTTCACTTAAAAAATTAAATCTGTGCATCATATACTCACCTCAAGTTGTT  
CAAACCTGTATGAATTTCTTTCTTCTGTGCTGAACACAAAGGAAGATATTTTGAAGAATGTTGGT  
AACCAGACAGTTGATGGACCCCATGACTTCCATAGAAGGGGGAGAATAGTAAATGGGGGT  
CCATCAACTGTTTGGTTTCTGACATTATTCAAAATATCTTCCTTTGTGTT CAGAAGAAGAAAG  
AACTCATACAGGTTTGAAACAACCTTGAGGGTAAGTAAATGATGACAGAATTTAACATTTTA  
AGTGA ACTATCCCTTTAAATTGATGTTGCTGACAGTAAACAATACAAGGTTATCAAAGTTTAC  
AGTAATAATCTTTTTTTTATGTATTTTGTATTTCCACAACAAAGGCCTAGTTTTTCTTTCTCG  
TGATGTTTT CAGTGTCTTGTAAATTAGTGTTGCTAATGATGTGCATTCTATATGCATTTTGCTGA  
TGTATAGCCTACTGAACAGTTGATGTTTGGATAATAATAGATCCATTTTGTATTGGAATTTTCC  
CGTGGAATTTTGAAGGAACTGAGGCCACTCTAATTAGATGAATTTCCACTTGGAAGGAG  
CGCACAGATTA ACTGCATGAAGAGACAAACAAAACCATGCAGAAATAGATCAAAACACTAT  
AACAGTCTTTTATACTAGGATGCTTGAAAATAGTTTTTCTGTATATTCTCTCACTATTCTCACTC  
ATTGTTTTGTGTC AATGAATGCAATAATCTTCTTCCCTCCACAATATAACAATTAAGTAGGG

|  |                                                                                                                                                                                                                                                                                                                                                                                                                                                                                                                                                                                                                                                                                                                                                                                                                                                                                                                                                                                                                                                                                                                                                                                                                                                                                                                                                                                                                                                                                                                                                                                                                                                                                                                                                                                                                                                                                                                                                                                                                                                                                                                                                                                                                                                                                                                                                                                                                                     |
|--|-------------------------------------------------------------------------------------------------------------------------------------------------------------------------------------------------------------------------------------------------------------------------------------------------------------------------------------------------------------------------------------------------------------------------------------------------------------------------------------------------------------------------------------------------------------------------------------------------------------------------------------------------------------------------------------------------------------------------------------------------------------------------------------------------------------------------------------------------------------------------------------------------------------------------------------------------------------------------------------------------------------------------------------------------------------------------------------------------------------------------------------------------------------------------------------------------------------------------------------------------------------------------------------------------------------------------------------------------------------------------------------------------------------------------------------------------------------------------------------------------------------------------------------------------------------------------------------------------------------------------------------------------------------------------------------------------------------------------------------------------------------------------------------------------------------------------------------------------------------------------------------------------------------------------------------------------------------------------------------------------------------------------------------------------------------------------------------------------------------------------------------------------------------------------------------------------------------------------------------------------------------------------------------------------------------------------------------------------------------------------------------------------------------------------------------|
|  | TCCAAATGTTACAAATCTGACATTTAAAAAAAAGTTTTAAGATTTTTGTTAGAAATTAAGA<br>ATTCCAACAGGAAAAGTGCCTTTTGTCTCCGCTCTTTTATTAGGCGTATGAATGAATAATGAA<br>CCAGCCGCTGGGAAGCTAAAAGAATAGCTTGGCTCCCCAAAACCTATATAGTAAGTATATAGAG<br>GGAGTATCACGATCTTCAACCAATAAAATCATACATGACATCATATCATATCATGTATACGTTGT<br>ATAACAAATCTATAAATGGTCAATATCCGGTAAAATTTCCCTTATGAGCCTTGCGGTCCGAAAG<br>ACTTATAATGCATAGAATAGAAGGCTCTTCCCTATCCGTACACTGGGGTCCACATTAATGGAT<br>AACAGATGTTTCATTACATACAAAAGAATCTGAGCATAACAGAACTGTTCTCTGGACATGGCTG<br>AGAGGGGAGAAAAATATAACTTCTAACAATTTTTAAAAACAAACATTATAACATGTAGAAACAT<br>TATGTAAGATAGTGCACGTGTTCTTAGGTCAAACAAGTACATGTGTGACATTGACCATCCACT<br>GTACAGATAGTCAAAAACACAAAGATGCACCTTGGATCATCTCAAATCATCCTGGATCACATG<br>ATCATCAAGTTTATACAACTTGTGGAGTTTATGTGGCTTAAATGCTTTAATTCAAGCGGGCTT<br>GACATGAGAAATCAAATTAGAGGTCTTTGTGCCATTAAACATCTGGCAAGTTTCGTAACCTTA<br>AAACGTCCTCCTCATTATAAACAAGCGTTTATTTAATCAAGCTCCAAAAACGACTCGGTTTGA<br>TATGGAGGGATCTGTGAAATCTCACTGGCTATGTGTTGCATATGACTGTCTCCAGAGAGGCAT<br>GATACAGATACAGTTTCTGGCATACTCCACGCACCTTAGTCTCCCGACAACAGGACAAATGG<br>AAGAGTGAATGAACATTTCGATTTGACGCTTCCAGTTTAAACAGCTTGTGTGCGTCTTTGTACA<br>GACTTCAGAAAGATCCCGGCTTTGGAAACAAGTGGATGGTTTTAATGGTTTATTTTAATGCCG<br>TCCTGGATCTCTTCGGAGTATTATATTGTTTGTTCGGAGCCTATGGTTTTGTCAGTGAGGCACA<br>GTGTAATGGAGAGTTCGCAAAGAACTTTTGTGTAAGATAAAGCAGCGAACTGTATTGGAT<br>CTTACAGCAGAGTAAATGATTTCATAATGTTTTGTCTGTAAATGATGGTTTTATATGGATAATGT<br>TTATGTTTTCAAACACTTACTCACACATGCAATAGCGAGTGGACGTTGATACTGTTTCTTAT<br>GCAGTGATGTTAGCTTATCATAAAATTGACCGTACAAGCCTTAAATGAGCCGTATGTATGTATG<br>TATGTATATATATATATATACTTTTTTGTGCAAAGAACTGTATTAACATTTTTAGTGAACATCA<br>AGGAACATATTAAAATATATTTTTTTAAATCCATGTCGTGACCCCTTTAAAGCAAAAAGTGTTTT<br>CAGAAAAAATTCTGAAAATTTGGGGGGGAAATTCCAAATTCAGAAAAAATGCACACCTGAA<br>GTGTACTCGTGGTCTTATGGTATGAATGGGTATGAATCACAAATACATATCACCAACATTTTTT<br>CTCTCTTTTATTTTATTCCTTTAAGGAGGTGTGTGTCGTCTTGCTCATGCAATAACCGTGTGCAT<br>GGCAGCCTTCAAGGGTGTGTGGACTCAGGAATTCTGGCGAGCGGTTTCGGGGGAGTTTTTA<br>GCCATGATAATATTCGTGCTGCTTAGTCTTGGATCCACAATCAACTGGACAGCAAAACAGGA<br>GAACCTCCACCTGCCGACCTCGTCCTCATCTCTCTGCTTTGGCTTATCCATTGCAACCCT<br>CGTCCAGTGTTTCGGGCACATCAGCGGTGCCACATCAACCCGGCCGTTACAGCGGCGATGG<br>TTGCCACGCGGAAGCTGAGCCTGGCAAAAGGTGTTTTTTATTTGTTGGCACAATGCCTGGGG<br>GCAATAGTGGGGGCGGCCATCTTGTATGGAGTGACACCAGAATCAGTGAGAGGAGGATTGG<br>GAGTGACTTCTGTGAGTATTTTTTAATTAGAGAGATAGTTCACCCAAAAATGACTCGTCTTCT<br>TTCTTTTTTTTTTTTTTTTTGTCCATGCAATGAAAGTCAATAGGGTCCTGTTTGTGTTTGGACC |
|--|-------------------------------------------------------------------------------------------------------------------------------------------------------------------------------------------------------------------------------------------------------------------------------------------------------------------------------------------------------------------------------------------------------------------------------------------------------------------------------------------------------------------------------------------------------------------------------------------------------------------------------------------------------------------------------------------------------------------------------------------------------------------------------------------------------------------------------------------------------------------------------------------------------------------------------------------------------------------------------------------------------------------------------------------------------------------------------------------------------------------------------------------------------------------------------------------------------------------------------------------------------------------------------------------------------------------------------------------------------------------------------------------------------------------------------------------------------------------------------------------------------------------------------------------------------------------------------------------------------------------------------------------------------------------------------------------------------------------------------------------------------------------------------------------------------------------------------------------------------------------------------------------------------------------------------------------------------------------------------------------------------------------------------------------------------------------------------------------------------------------------------------------------------------------------------------------------------------------------------------------------------------------------------------------------------------------------------------------------------------------------------------------------------------------------------------|

CCATTGACTTTTCATTGTATGAGCAAAATGCACTCGAGTTATTCTTTAAAATATCTTCCACAAAT  
GTGTTCTGCAGAAGAAAAAGCCTTGCCTTGCCTTGCCTTGAGTAAATGATGACAGAGTTTTG  
GGTTTTGGGCAATCGCTTTAAGGCAGTTGATTAGAAGTTTTACACCTGATTAACTCATCAGT  
CATTAGTAGAGTACTCAATAACCTAAATTAGGCATGTCTCAGTGTGATCCCTAAAATTTGTAA  
GTAGTAGGGGCCTCCAGGAGAATGATTGAAAAACACTGGTGTCCAGCAAGTATTTGATAAAG  
CTCACGCTATACAAATAACTCACTATCGCCCCCTTGCAGGTCAATACTGAAATCTCCACTGGTC  
ATGCCATTGTGATAGAGCTCATAATCACTTTTGAGCTTGTCTTCACTGTCTTTGCCACCTGTGA  
CCCCAAGCGCAGTGATCTTAAAGGTTCTGGCAGCGCTGGCTATTGGTCTGTCGGTGTGCATCG  
GCCATCTGTTTGCTGTGAGTATTTCTGATTTGCACCACTAGAAAACATTAAATTATTTGTGTA  
AAATTACATTTGCTATACATTTTCATGCACTTTCCGAAGCATGTTTCTTATGAGGGCTTTAAGTT  
AACTGAAATTTTCAATCCTGCACTGTCAAGCACATTTTAAAGCAGTGCTTGAAGATCTTTATC  
CTATAAAGATTAGTCTCTTGAGGTGTATCTGCTTAGTTCTCCTTTGGAGAATTTGTAGCCTAGC  
TACAATCCCAAGTGATAGTGTTATTTCCATGCCAATAATCCCAGCAGAATCTGCAGATGAGGT  
GTTTATATGAAAGCTCATTGTGTGTTGCTAAGAAAGTTGGCATGAGAGCGGGATGCCCTCTATA  
TGCCCTCATGTATTTAGGTCTGGCACTGAGACAACTCTACTTAAGACCCTTTAGAGCAGATT  
TATGATTTAAAGAGCCAAACCACTGTCACTCAGCTCACTCATTCCTTCCATCTCTCACATTGT  
TTCTTTGCATTTCTTCTGCTCTTCCTTTAGAGTCTCTTCTCAAAATTCCATGCCAGGCTCATT  
TGAAATGTGCCTGTGGCGACATTTCTGCAAAATAATATCATGTTGCTTCTTGCATATTTCAAA  
CACTCTCAGAGTGAAATGTCCAGTGAGTGGTGCTAAAAGTGTGTTGGTTTTAACATATGAAC  
ATGATTCTGACAAAGTTTGATTATTTTGGTTTATTACGTTGAATGGAGATAAAAGGTCAATGCT  
CAATTGTGTTTGAAATTAATGTACCACCTACACTAAACCTAAATGATAGTGTTAACAAAAGCA  
AGCATGAGATAACGTTTTCTGAAGGAAGAATGCATTTAGCCTACTTATTGAGTGTTGAGGAG  
TGCTGTACCAGGTAAGTTGCAAAGCAAGTTTACTACGTCAGAAAATCCATACGTATGGAGCT  
GGTTATGTGATGTAAATGTCAAAATGTATTAGTATACAAATCACGCTCTATGGTAAAAATGTTT  
TGAGGTCATAACATAGTGCTGTGCAAGAAAACGGCCAAAATTTCCAATAAACTTGTGCAAA  
ATTCATGCAATTCATAACAAGTGTAACACGTTTTGTCTGTGTGTTCCAGATCCCGTACACTGG  
AGCCAGTATGAATCCAGCTCGCTCTTTTGGTCCTGTGGTCATCATGGGAAAATGGCAGGACC  
ATTGGGTAAGATTCACGCAATATATTCTGTGTGTGGAGAACTATACGAAGACTCATTAAGG  
GATAGTTCACCTAAAATGAAAATTCTGTCATAATTTACTCACCTTCAAGTTGTTCCAAACCTG  
TATGAATTTCTTTCTTCTGCTGAACACAAAAGAAGATATTTGAAGAATGTCTGTAACCAAC  
AGGCCCATTGCCCCCAAAAAATACTATGGAGGTCAATGTGGTCCATCAACTTTTTGGTTGCC  
GACATTACAACTTGAGGGTGCGTAAATGATGACATAATTTACATTTTGGGTAACTATCTCTT  
TAAGTTCTTTCTAAACCCTACATTGATATTTATGTGCATAAAGATTCAAGGTCAGCAAGGCCTT  
TGGAAGTGTGATTGATAAAAGTGAAGCTGCCGAGAATTTGATTCAATGCCAAAACCTTTTTTA  
AGAAGAGAATTTTGGCTTTGTTTCACTCCTACAAAGGAGCCTGAACTATATCTGGCGCATGA

AGACATTTATCTCTGACCTACCACAGACCTTTGGCATGAATCTTGATATACTGGATTCATTCAT  
TTTGAATGTCTCAGTGTAGAAGTGTGTATAAAAAGCACCATACTCTCAGTCCTGCTGTTGTAC  
TGAATATCAAACGGCTGCAAGACATACTGCAGCTCTCTTGCTTGTGCGATTTTCAAATGTCAT  
TCTCCTTGAAACATTATAGAGCAATCTTAAAGCAGACAGATGTGGCATTCAAATAAACACC  
GGTACATGACACTGGTTGGTGTGCTCCCTACATGCACATATGAGTGTATGTATCTTCATGAGT  
GGCGCGTCTGAGTGACTGCTGCTGTCATCAGGGTTGATACAGGGTCTCCCCCTGTGGTGCTGT  
AACATTAGAAAAGGTCAAAACATTTCTTTTCATGGAGTGTTTACCGCACTTGCAGCATGCTACA  
CACAGTACCCTTTTCAAGGCGTTGGTGTTAGTTTCTTCAATGAAAGATTTTAGAGATTATGAA  
TGAAAGCAATGCATCAGGCGTGAAGCCACATGAAGGCCACTCTGGTACTGTTACACTAATGA  
GAGCTGCTGGTGATCATTATACTGTATATATAATCGTTTGAAATAATGAGATAAACGAAATGA  
ACTGCATTTTGGACACTGTCCGGGGTTTGCAGGGTAAATGTATCTGGCCTGTGCTATGCAG  
TCAGTCGCACCCACTTCTATTTCTGTCATCACAGCAGTTAGTAATCCAGTTTGGCACACTTT  
TGGAGTCAATAACCTTGGCACACTGATAAAATGTATATATCAGACACGGATATAAGAGCAGGA  
CAGATTATTTACTGGGCTGAAAATATAATGAAGGAAAGGAAAGGAAAGGCATACTTCATAA  
CAAAATTGTTTTTTCACAATATATTCAATCATATACACAAAATGCAAAACATGATTAATACAGG  
GGGTCCAAACATCTGAGACCAAAATTTAATAAAATGTAATAGATTTTCTTTTCATTGCAAAT  
GATAATATTAGCATAATAATAACAATTTGTGTGAAAAGTTAATATTCATCATATTAATTGAGCT  
TATTTATTTTAAATGAATTAATAATAATTAATAATATAATATTGTATATTAATGCATATATATACAG  
TACACTACCGTTCAAAGTTTGGGGTCAGTAAGATTTTTTATGTTTTTAAAAGAAGTATCTT  
CTGCTCACCAAGGGTGCATTTATTTGATAAAAAACAATAATAAAAAAACAGTAATATTGT  
GAAATATTATGACAATTTAAATGACTGTTTTCTATTTTAATATATTTTAAACTGTAATTTATTCC  
TGTGATCAAAGCTGAATTTTCAGCATCATTACTCCAGTCTTCAGCGTCACATGATCCTTCAGA  
AATCATTCTAATATGATGATTTGATGCTCAAGAAACATTCATTATTATTATCAATGTTGAAAACA  
GTTGTGTACAATTTTTTTTCAAATTATTTGATGAATAGAAAGTTCAAAGAACAGCATTATTT  
TAAATAGAAATTTTTCTAACATTATAAATGTCCTTACTGTAACCTTTGATCAGTTTAACTCATC  
CTTGATGTATTGATTTATTTTATTTCTTTCCCCCAAAATCAAATTAATTTCTTACTGACCCTA  
AACTTTTGAACGGTAGTGTTAATGTTACAAAAGCTTTAGATTTTCAGATAAATGCTGTTCTTTT  
GAACTTTCTATTCATCATAGCATCATGAAATAAAAAATGTAAATAACTGTTTTCAACATTGATAA  
TAATCATAAAGTTTGGTATATACAGGTGCTGGTCATAAAATTTGAATATCATCAAAAAGTTGAT  
TTATTTCAAGAATTCAACTTAACAGGTGAAATTAATATATTATATAGACTCATCACATGCAAAG  
TGAGATATTTCAAGCCTTTATTTGTTATAATTTTGATGATTATGGCTTACAGCTTATGAAACCCA  
CGAAATCAAAATCCCAGAAAATTGGAATATTACAGGAAATCACACAGTAATTACACAGTAAT  
ACCATGGTCATTGAACCAGGTTTTGGTTCTTTTGGGCAGGTGCAAATCCTGCTGGAAAATGA  
AGTCAGCATCTGCATAAAGCTTGCTGCTGAAGGAAGCATGAAGTGCTCTGAAAATGTCCTG  
GTAGACGGCTGCGTTGAGTGGACAGCACAGTGGACCAACACCAGCCGATGACATGATTCCC

|  |                                                                                                                                                                                                                                                                                                                                                                                                                                                                                                                                                                                                                                                                                                                                                                                                                                                                                                                                                                                                                                                                                                                                                                                                                                                                                                                                                                                                                                                                                                                                                                                                                                                                                                                                                                                                                                                                                                                                                                                                                                                                                                                                                                                                                                                                                                                                                                                                                                                  |
|--|--------------------------------------------------------------------------------------------------------------------------------------------------------------------------------------------------------------------------------------------------------------------------------------------------------------------------------------------------------------------------------------------------------------------------------------------------------------------------------------------------------------------------------------------------------------------------------------------------------------------------------------------------------------------------------------------------------------------------------------------------------------------------------------------------------------------------------------------------------------------------------------------------------------------------------------------------------------------------------------------------------------------------------------------------------------------------------------------------------------------------------------------------------------------------------------------------------------------------------------------------------------------------------------------------------------------------------------------------------------------------------------------------------------------------------------------------------------------------------------------------------------------------------------------------------------------------------------------------------------------------------------------------------------------------------------------------------------------------------------------------------------------------------------------------------------------------------------------------------------------------------------------------------------------------------------------------------------------------------------------------------------------------------------------------------------------------------------------------------------------------------------------------------------------------------------------------------------------------------------------------------------------------------------------------------------------------------------------------------------------------------------------------------------------------------------------------|
|  | CAAACCAACACAGATTGTGGAAACTTCACACTGGACTTCAAGCATCTTGGATTGTGTGCCTC<br>TCCATTCTTCCTCCAGACTCTGGGACCTTGGTTTCCAAATGAGATGCAAAATTTGCTCTCATC<br>AGAAAAGAGGACTTTGGTCTACTGTGCTTTATTAAATCCAGAGTCAACGCAGCCGTCTACCA<br>GGACATTTTCAGAGCACTTCATGCTTCCTTCAGCAGACAAGCTTTATGCAGATGCTGACTTCA<br>TTTTCCAGCAGGATTTGCACCTGCCACTGCCAAAAGAACCAAAACCTGGTTCAATGACCAT<br>GGTATTACTGTGTAATTACTGTGTGATTTTCATGTAATATTCCAATTTTCTGGGATTTTGATTTCG<br>AGGGTTTCATAAGCTGTAAGCCATAATCATCAAAATTATAACAAATAAAGGCTTGAAATATCT<br>CACTTTGCATGTAATGAGTCTATATAATATATTAGTTTCACCTGTTAAGTTGAATTCTTGAAATA<br>AATCAACTTTTTGATGATACTCTAATTTTATGACCAGCACCTGTATATACTGCATTATTATATATT<br>ATGTTATTTATCAGTTGTGGTCAGAATTATTGCATCCTCCTCTGAATTATTGACACCCGTGGTA<br>AATATGATCAAAGATGTAAAAATAAATCTGCATTTTATTTATCCTTTTGATCTTTCATTCAAAAA<br>ATTTGCAAAAATCGAACCTTTCATTGAAGTAATATAATTGAAAATGAGGGGAAAATCACATTA<br>TGAAATAAATGTTTTTCTCCAAAACACGTTGGTGCACAATTATTGGCACCCCTATAATTTTTTAT<br>GAGTAAAATATCTCTGAAGTATATTCCCATTAATATTGACTCGGCACACCAGGGTGACTAGGA<br>ATATGAAATTGTCTGGCTATGACTTTTGAGTTGAAATATGTGGAAACTCAAAGGCCAAATTCC<br>CTTAATCATCCATAACAATGAGTTAAACCAAAGAATATAGCACCAAAACATTGTTGAGCTTTA<br>CTACATAGAAAGTGGCGGTAAGAAAATAGCTAAAGCAATGAAAATTCCCATTTCCACCAAGG<br>TTCCAATCAACTAAAGAGGTTATTAATCTGCCTGGAAGAGAACGTGTGTCTATATTGTCTTAA<br>TGCACGGCGAGGAGGAGAGTTTGAGTGGCCAAAGACTCTCCAGGGATCACAGATGGAGAAT<br>TGCAGAGATTACTTGAGTCTTGGGTTTCAGAAAGCCTAAATCAAAACAAAAATCAAACAACC<br>CCTACATCACCACACGTTGTTTGGGAGGGCTTCAAGAAAAATCCTCTGCTCTCATCCAAAAA<br>CAAACCTCCAGTATATTTCAGTTGTCAAACCTGTAACCTCAAAGGGACTGGATTCTATGGTCAG<br>ATGGAACTAAAAAAAATAGATTTTTTGGCAGCAGATCCACCAGATGTGTTTGGTGCAAACAGG<br>GATAAAAGTACCCTATGCCTACAGTTAAATATACCGCTGGATCTTTAATGTTGTGGGCCTATTT<br>TTTTGCTGGAGGTCTCGGACATCTTGTTTCAGATACATGGTATCATGGATTCTAGCAAATACCA<br>ACAGATACAATTTTTTTTTTAAACCTGACGGCTTCTGCTAGAAATCTTATAATGGGCCGTGGTT<br>GGATCTTCCATCAGGACAACGGTCCAAAACAAACATCAAAATCAACAAAAATGTGTCACTG<br>AGCACAAAAATGAAGCTTCTACCATGACCGTCCCAGTCCCCTGACCTGATGAGTGGAGTGA<br>ACTGAAGACGAGAAGCACCAACATGGATCTGGGAATGTGAATTGGATCCGGAGAGATTCTG<br>TATGGAGGAATGGTCTCTGATCTCTTGTAAGCTGTTCTCCAAACTCATCAGGCATTATAGGAG<br>AAAACAGTTTCTCTGTTTCTTATGTTGGAAAAAGGAGGTTGCAAAAAGTATTTAATAAAAAGG<br>GTGCCAATAATTATGGTCAACGTGTTTTGGAGAAAAGAATTTATTCATAATGTGATTTTCCCCT<br>CACATTCAATTATTTTACTTCAATGAAAGGTTTCGATTTTTTTCGATTTTTTTTTTTTTTGGAAATA<br>TCAAAAGGATAAACAATGTAGATTACCATCTTTGATCATATTTACAAGGGGTGCCTTTAATTCT<br>GACCACAACCTGCATATAAATGCAGATATATCTATATTAAATATTTCTTATTATTTTACATAATAA |
|--|--------------------------------------------------------------------------------------------------------------------------------------------------------------------------------------------------------------------------------------------------------------------------------------------------------------------------------------------------------------------------------------------------------------------------------------------------------------------------------------------------------------------------------------------------------------------------------------------------------------------------------------------------------------------------------------------------------------------------------------------------------------------------------------------------------------------------------------------------------------------------------------------------------------------------------------------------------------------------------------------------------------------------------------------------------------------------------------------------------------------------------------------------------------------------------------------------------------------------------------------------------------------------------------------------------------------------------------------------------------------------------------------------------------------------------------------------------------------------------------------------------------------------------------------------------------------------------------------------------------------------------------------------------------------------------------------------------------------------------------------------------------------------------------------------------------------------------------------------------------------------------------------------------------------------------------------------------------------------------------------------------------------------------------------------------------------------------------------------------------------------------------------------------------------------------------------------------------------------------------------------------------------------------------------------------------------------------------------------------------------------------------------------------------------------------------------------|

[illegible]

|  |                                                                                                                                                                                                                                                                                                                                                                                                                                                                                                                                                                                                                                                                                                                                                                                                                                                                                                                                                                                                                                                                                                                                                                                                                                                                                                         |
|--|---------------------------------------------------------------------------------------------------------------------------------------------------------------------------------------------------------------------------------------------------------------------------------------------------------------------------------------------------------------------------------------------------------------------------------------------------------------------------------------------------------------------------------------------------------------------------------------------------------------------------------------------------------------------------------------------------------------------------------------------------------------------------------------------------------------------------------------------------------------------------------------------------------------------------------------------------------------------------------------------------------------------------------------------------------------------------------------------------------------------------------------------------------------------------------------------------------------------------------------------------------------------------------------------------------|
|  | <p>CTTTGAAGATTTTAGCCAGTCACTGAACATCCTTTAGCAGATGCACCTCATCAACTACAGAAT<br/> CAATAACTAAATGGGATTCTCACATCTAAGCAACTGTAACGGTTTTCTTTGGTTTACGGGTTA<br/> TTACCTGGCAATCAGGGGTTGAGATAAGATCATCACCATAGTAATGCAGACCATTTTCCTTCT<br/> CAGTGCACCTCTGTAGAATATTAACCCCTTCTGCCCTTTACTTCTGTCTCACCTTCTCCCTTTT<br/> AAATGTAATGTTCTGTAGAGTATTTTTATATTTAATTTTTCTTAAAGGTTATGGATGTTATGTCT<br/> TTGAATGTCACCTGTCAGAAATCTGTATAATTGCAACCCTGCATGACTCTTATTTTATTTTTTAG<br/> CCTAAAATGCATGACTTTTCCAACACATGCACACAAAACCCGAACATATTGTGTCCGATTGTG<br/> TCAGTTCTTTCATATCCAACCTTGAATTGCGTTATTTTAGGCTGATTTATTATCTAGCCATGTGT<br/> TGGATGCATACAATTATTTATGTAATCAAGTGATGTATATTAAGTGTTTAATAATAATTTGAAAA<br/> CTGGAGTATTATATTAAGAAAAATAACTGGAATTTCTTACGGAAGCCCATTTTACCCACAGA<br/> GTTAAAAAATAATAATAATAGGCTTCCATAATAATTCCTTTACCAACAGGCATTTACATCTCTTT<br/> ACCAGCAGAGGGCAGCACATCCTTAAACTGCGTCGTAAACCTGAAACTCCAGTAATGCTGA<br/> GCTGATTTATTTATCTGTTGGCGATAAGTACCAGATTATTATAATTTTTTTGGTTGTGAAATATT<br/> GTTTAGGGGACGGTTTAGCTCCTCTCTCCTCTTACATAAGTCATTCTCATGTTTCAGTTTCACTT<br/> TTATACCACTCCCTTCTTTCATTTAGTCAGAATAAGTGTGTGTATGGTCATGAAAAACCTGGAT<br/> AGGCCTATATTGTTTTAATCATTTTAATATTGTTTGATTTTCATGGCTTAAAAAACAGGTAAATT<br/> CATAAACATGTAAAAAGTTGTGTGAGTTACTGTTGAATATAATGATGTTCTATATGCTCAGTTG<br/> AAAAGAAAGTAGTTTGCAATAATTTGTTCTTTACATTTGCAATAAATTTTTGTAATTTT</p> |
|  | <p>ATGAGAAAGGCGTTTTTCGCGGGTCTCGGTTTCTAACAGAAGTCGTGGCTTTCTTCGG<br/> AGGTGTGTGTGTCGTTGCTCATGCAATAACCGTGTCATGGCAGCCTTCAAGGGTGTGTGGAC<br/> TCAGGAATTCTGGCGAGCGGTTTCGGGGGAGTTTTTAGCCATGATAATTCGTGCTGCTTAG<br/> TCTTGATCCACAATCAACTGGACAGCAAAACAGGAGAACCCTCCACCTGCCGACCTCGTC<br/> CTCATCTCTCTGCTTTGGCTTATCCATTGCAACCCTCGTCCAGTGTTTCGGGCACATCAGC<br/> GGTGCCACATCAACCCGGCCGTTACAGCGGCGATGGTTGCCACGCGGAAGCTGAGCCTGG<br/> CAAAAGGTGTTTTTTATTTGTTGGCACAATGCCTGGGGGCAATAGTGGGGGCGGCCATCTTG<br/> TATGGAGTGACACCAGAATCAGTGAGAGGAGGATTGGGAGTGACTTCTGTCAATACTGAAAT<br/> CTCCACTGGTCATGCCATTGTGATAGAGCTCATAATCACTTTTGAGCTTGTCTTCACTGTCTTT<br/> GCCACCTGTGACCCCAAGCGCAGTGATCTTAAAGGTTTCGGCAGCGCTGGCTATTGGTCTGTC<br/> GGTGTGCATCGGCCATCTGTTTGCTATCCCGTACACTGGAGCCAGTATGAATCCAGCTCGCTC<br/> TTTTGGTCCTGTGGTCATCATGGGAAAATGGCAGGACCATTGGGTATACTGGGTGGGCCCTTT<br/> AATAGGGGGCATCCTTGCTGCCGCTGTGTACGAATATCTATTCTGTCCCGACCCTGACCTGAA<br/> GCGGCGCTATGCCGACGTCCTCTCCAAGAGCCCCTTCCAGATCGACCCGTATCGGGTTGTGG<br/> ACACAGAGACGTACCCAGCGATCAAGCTCAGCTCATGGCCAAGCAGGCAGCGATCCGAGT<br/> GCTGGACCTGGAGAGGGGCAGAGAAGAAGCGGAGGGAGTCTGCTGGAGAAGTGCTGTCGTC<br/> TGTATGA</p>                                                                                                                                                                 |

|                       |                                                                                                                                                                                                                                                                                                                                                                                                                                                                                                                                                                                                                                                                                                                                                                                                                                                                                                                                                                                                                                                                                                                                                                                                                                                                                                                                                                                                                                                                                                                                                                                                                                                                                                                                                                                                                                                                                                                                                                                                               |
|-----------------------|---------------------------------------------------------------------------------------------------------------------------------------------------------------------------------------------------------------------------------------------------------------------------------------------------------------------------------------------------------------------------------------------------------------------------------------------------------------------------------------------------------------------------------------------------------------------------------------------------------------------------------------------------------------------------------------------------------------------------------------------------------------------------------------------------------------------------------------------------------------------------------------------------------------------------------------------------------------------------------------------------------------------------------------------------------------------------------------------------------------------------------------------------------------------------------------------------------------------------------------------------------------------------------------------------------------------------------------------------------------------------------------------------------------------------------------------------------------------------------------------------------------------------------------------------------------------------------------------------------------------------------------------------------------------------------------------------------------------------------------------------------------------------------------------------------------------------------------------------------------------------------------------------------------------------------------------------------------------------------------------------------------|
|                       | MRKAFSRVSVPNRSRGFLRRCVSSCSCNNRVMAAFKGVWVTQEFWRAVSGEFLAMIIFVLLSLGS<br>TINWTAKQENPPPADLVLISLCFGLSIATLVQCFGHISGAHINPAVTAAMVATRKLSLAKGVFYLL<br>AQCLGAIVGAAILYGVTPESVRGGLGVTSVNTEISTGHAIVIELIITFELVFTVFATCDPKRSDLKG<br>SAALAIGLSVCIGHLFAIPYTGASMNPARSFGPVVIMGKWQDHWVYWVGPLIGGILAAAVYEYL<br>FCPDPDLKRRYADVLSKSPFQIDPYRVVDTEYPSDQAQLMAKQAAIRVLDLERAEEKKRRESAG<br>EVLSSV                                                                                                                                                                                                                                                                                                                                                                                                                                                                                                                                                                                                                                                                                                                                                                                                                                                                                                                                                                                                                                                                                                                                                                                                                                                                                                                                                                                                                                                                                                                                                                                                                                              |
| Lw_Aqp7<br>(OQ301575) | GTTCAATGGCAACCCTTCAAAAAACCTAAATAGCAAACCTGGGGAGAAGAGCCCTTTGCAG<br>AAAAAGAGCGAGAGGAAATGAAACAGGAAGTCAACATAATGGAGGACGGTTTTCAAGGCC<br>ATATGGCACCTACTGTGGTATCCATGTTGAAGATCAAGAATGAATGCATTGAGTGGTCCTGG<br>CAGAGACCCTCTGCACATTTGTCATGATGGTGAGATGGTTTAATAGTGGCTCATTTGCATGTT<br>CATTGCTGGAATAATTGTCACCTGTGTGGTGATGCCAAGCTTGGAAAACAATTTACTGTTGAGT<br>ATTTTACTGCTGATTTCTTTCATTGTTTATTGAATTATTCATTCTTCAGCATAGACTAGAGCATT<br>GTCATTGTAATGCTTTGGATCACATAGCCACAGTCAGGTCAGTAGGCTGTGGTCAGTGCATTG<br>GTGATTGGCGTCAGATCATGTGCTACATATATTCTATTCTTAGAAAACTGGCTGGACATACTT<br>TTTTCCATGATCAGGTGAAATCAATGTGACCATGTCAATTGCAAAAACTGGCCAACAGCAA<br>TGCTAACTGACCAGTCATTTGCGAAACCTATGTTCCAAATTGAGTAGCTGGAATCAGTCCAG<br>TTTTATTTTAGTATTATTCATACACTATTATAGTTTTATTAATATTTTGAATTAGCTTTTGTTTTA<br>TATTTTCAGTTTTATTTTCATTTTACTTCAATTTTGAGTTATGTGCTTTTGTTCATTTTATTAGT<br>TTTTGTTCAACAATAAGGTCTCATTTGTTAACAATAGGAAATGCAAAAACTAACATGAACTAA<br>CGATGAAAAATGTTTTTACTGCATTTTTTTTAACTTTATGAATGTTAGTTAATACAAAAGTTC<br>ACACAGTGCATTAAGTAACTAGTAACTTATGTTAACTTATGTTAACTTATGTTAACTTATGTT<br>TTCATGTTAACTAATGTAGTTAACTTATGTTAACTTATGTTAACTTATGTTAACTTATGTT<br>GGTTTTAGTTTTAGTTTCACTTATGTTAACTTATGTTAACTTATGTTAACTTATGTTAACTT<br>TAACTGATTTTCACTAGTTTTCACTTATGTTAACTTATGTTAACTTATGTTAACTTATGTTAACT<br>TTTAATTTAACTAATGTTTAACTTATGTTAACTTATGTTAACTTATGTTAACTTATGTTAACT<br>AGTTTTACTTTTTAACTAATGTTTAACTTATGTTAACTTATGTTAACTTATGTTAACTTATGTT<br>CCACTTTGCCACACACACACACACACACACACACACACACACACACACACACACACACACACAC<br>ACACACACACACACAGGGGCGTCAGACAGGGGGTAATAGTGCAGCTGAGTAACAGCTGCA<br>CTATTGGGCCCCTGGCGAAGGGGGGACCCACAAAGATATATTGATATATATTGGTGTGTG<br>AGGGGCCCCAACATTTGGTGCTACGCCCCACACACACACACACACACACACACACACACACAC<br>ACACACACACACACACACACACACACACACACACACACACACACACACACACACACACACACAC<br>ACACACACACACACACACACACACACACACACACACACACACACACACACACACACACACACAC<br>ATGGTCCAGAAAAAAATATTCACACTTGTATTGTCCGAGGTAAAAATGATAGCAATGGGAA<br>ATTAATTTAATCTAGTGGAACATTTGGTACTGCACCCAAACAAAATCTTACTGAAAGCTCTT<br>TTTTTTTGGAGATATCAAGCTCAAATTTGGAACACAACCTGTTTAGATTTATGGCTTTGGTTTT |

|  |                                                                                                                                                                                                                                                                                                                                                                                                                                                                                                                                                                                                                                                                                                                                                                                                                                                                                                                                                                                                                                                                                                                                                                                                                                                                                                                                                                                                                                                                                                                                                                                                                                                                                                                                                                                                                                                                                                                                                                                                                                                                                                                                                                                                                                                                                                                                                                                                                                                |
|--|------------------------------------------------------------------------------------------------------------------------------------------------------------------------------------------------------------------------------------------------------------------------------------------------------------------------------------------------------------------------------------------------------------------------------------------------------------------------------------------------------------------------------------------------------------------------------------------------------------------------------------------------------------------------------------------------------------------------------------------------------------------------------------------------------------------------------------------------------------------------------------------------------------------------------------------------------------------------------------------------------------------------------------------------------------------------------------------------------------------------------------------------------------------------------------------------------------------------------------------------------------------------------------------------------------------------------------------------------------------------------------------------------------------------------------------------------------------------------------------------------------------------------------------------------------------------------------------------------------------------------------------------------------------------------------------------------------------------------------------------------------------------------------------------------------------------------------------------------------------------------------------------------------------------------------------------------------------------------------------------------------------------------------------------------------------------------------------------------------------------------------------------------------------------------------------------------------------------------------------------------------------------------------------------------------------------------------------------------------------------------------------------------------------------------------------------|
|  | CTTACAGTTTTAGAGTAAAACCTGTTATTTATTTCTGTTAAACTATTATTTGGAAAAATATATATTT<br>CATATAAAATGTTAAAATAGTAATTTTTATGCATTTTTTCATAATAATAAACTTAAACTTCTATAA<br>CTTTTTTTTTTAAATTCCACCTTTTAAACCTTTCACTTAAGCAATATTCTGCCAAGTGTCACTCTT<br>TAAAAAAAGACCAAACCTTAAGTCTGTGCTCCAAATCATTCAAGATTTCAATTTTTTTTTTAATT<br>GAATTGCTATGCTAAGTGGTTAACAGGCAATAAATGGATCAAAACTATTCCATAAAATTAAATTT<br>AGTACCACAAAATCCCCTAAAAATACAAAATATTAAATGAAAAACATTATCGAACTAAAATAC<br>AGAGCATTCAATTTAATTGAAGTAAAAAATAAATAAATAAAAAAGCTGTCATTTTTGACCACCA<br>TATATTTTACTTGCAGTTTTAGTTAACAATAATGTCTAATTGTGGTCTCTTTAGTTAAAACTATC<br>ATGTTTATTTATAAAATTCTCACTCTTTATCTGAGAAGTAGCCATGAAATAAGCCTTGAATTAG<br>GGTTTATTTTCCTGTCTGGCTGCACATCATCCATGATAAGCATTATTCAGTTTCTCTGACAGAC<br>TATTTTGGAATTCCAGGTGTTTCGGCCTTGGCTCTGTTGCACAAGTGGTCACAGGAAATGGTT<br>TCTTCGGAGATTACCTCAGCATGAATATAGGCTTTGGACTGAGTGTGGCTATGGGTGTGCACA<br>TTGGTGGAAGTGTGTCAGGTGAGACCCTGTTGTCCCCAAGGTCAGAGCTCTCCTAATTCACT<br>GTTTTCCATATTAATGACAATTAATAATGCAATATGTTTTTCTCCATCGCATAGGAGCTCATATG<br>AATGCAGCTGTTTCCTTCACAATGTGTGTGTTTCGGCCGTTTTCGCTGGAAGATGCTGCCACT<br>GTATGTTTTCGCCAGTTTTCTGGGTTTCCTTCCTCGCTGCCGGGACCATTTTTTCACTTTATTAC<br>GGTGAGAAGGAGTTATTTTTGTTCTTAGTGTTGGAATAGTTCATATAAATTGCCACAAGTTTT<br>CTTCACTCACATCTGTACTGTGCTTTATAGATGCTATACATCATTACTGTGGGGGCAATTCAC<br>TGTGTCTGGTCCCAAAGCAACAGCTGGGATCTTTGCCACATATCCAGCACCTTACATCTCAAT<br>CTACACTGGATTCTTCGACCAGGTATTTCAAAATGAATCGTGCGCAAAAATTTTTCTCAACT<br>GTACCCATTAAGCACTTTTAGAGGAAGATATTTTTAAATTCTCCGAATCAGGTTGTGGGCACC<br>GCCATGCTGTTGCTGTGTCTGATGGCTCTGGCAGACCAGAGAAACCAGCCGTTGTGGCTG<br>GAGGTGAGCCTGTTGGTGTGGGGCTCGTGGTGCTGCTCATTGGTGTCTCTATGGGGAGCAAC<br>AGCGGCTATGCCATCAATCCCACACGAGATCTGGGGCCAAGAGTCTTCACACTGATGGCAGG<br>TTGGGGCATGGAGGTTTTCAGGTGAATAAAATATAAAATCAAGCTATAAAACACTCTTTGTTAT<br>TTGTTTGGATCAGGGTTAATGATTTGTAACACCTCCTGCTTTTTCAGCCACAATAACCCTGAA<br>TTCTTGATATGCATCACTGGAAATTATGTTTTGGATTTTGATAAAGTAAGTCACTGTTATCTAG<br>AGAGCACCTAAAGGGACATGGTGATGAAAAAATATGAGATGGGAGGATAAAAAATATTTCAA<br>TGCTTTTTCGTTCCCTTGAGAACTTTGCATTCGCACGCAAAGAACTCAAAAGGTTTCTCAG<br>GGGAACGCAAACATTTTGCAAGCGAACACAAAGTTTCTCAAGAGAATGCAAAAGCATTGAC<br>ATTTAAATATTTCTCCATCTCATATATATTTTTCCCGTCCCATGTGCCTTTAGGGAAGCGT<br>TCCTCAAATCAGATCCTGGAGGGCCACTGCCCTGCAGAGTTTAGTTCTAACCCTAATCAAAC<br>ACCTGAACAAAGCTAATCAAAGTTTTCTGAGTTACTAGAAAATTGCAGGTAAGTGAGTTCAT<br>GGGATAAACTCTGCAGGACAGTGGATTTGAGGAACCCTGCTTTAGGGGCCCTGTAATGATCA<br>GATCAGATCTATAACAGGAAAATATTTTGGTAACACTTTACAATAAGGTCTCATTTGTAAACAT |
|--|------------------------------------------------------------------------------------------------------------------------------------------------------------------------------------------------------------------------------------------------------------------------------------------------------------------------------------------------------------------------------------------------------------------------------------------------------------------------------------------------------------------------------------------------------------------------------------------------------------------------------------------------------------------------------------------------------------------------------------------------------------------------------------------------------------------------------------------------------------------------------------------------------------------------------------------------------------------------------------------------------------------------------------------------------------------------------------------------------------------------------------------------------------------------------------------------------------------------------------------------------------------------------------------------------------------------------------------------------------------------------------------------------------------------------------------------------------------------------------------------------------------------------------------------------------------------------------------------------------------------------------------------------------------------------------------------------------------------------------------------------------------------------------------------------------------------------------------------------------------------------------------------------------------------------------------------------------------------------------------------------------------------------------------------------------------------------------------------------------------------------------------------------------------------------------------------------------------------------------------------------------------------------------------------------------------------------------------------------------------------------------------------------------------------------------------------|

|  |                                                                                                                                                                                                                                                                                                                                                                                                                                                                                                                                                                                                                                                                                                                                                                                                                                                                                                                                                                                                                                                                                                                                                                                                                                                                                                                                                                                                                                                                                                                                                                                                                                                                                                                                                                                                                                                                                                                                                                                                                                                                                                                                                                                                                                                                                                                                                                                                                                                                                              |
|--|----------------------------------------------------------------------------------------------------------------------------------------------------------------------------------------------------------------------------------------------------------------------------------------------------------------------------------------------------------------------------------------------------------------------------------------------------------------------------------------------------------------------------------------------------------------------------------------------------------------------------------------------------------------------------------------------------------------------------------------------------------------------------------------------------------------------------------------------------------------------------------------------------------------------------------------------------------------------------------------------------------------------------------------------------------------------------------------------------------------------------------------------------------------------------------------------------------------------------------------------------------------------------------------------------------------------------------------------------------------------------------------------------------------------------------------------------------------------------------------------------------------------------------------------------------------------------------------------------------------------------------------------------------------------------------------------------------------------------------------------------------------------------------------------------------------------------------------------------------------------------------------------------------------------------------------------------------------------------------------------------------------------------------------------------------------------------------------------------------------------------------------------------------------------------------------------------------------------------------------------------------------------------------------------------------------------------------------------------------------------------------------------------------------------------------------------------------------------------------------------|
|  | <p> TAGTTAATGGATTAACATAACATGAACATAACAATGAGCAGTACAGTTGTTACAGTATTTATCAAT<br/> CTTTGTTAATGTTAGTTTTGTTAATAAAAAACAGTCTTTCATGTTAGTTCACAGTGCATCAACTA<br/> ATGTTAAAAAATACAACTTTTGATTTTAATAATGCATTAGTAAATGTTGAAATAAAATACTTAAA<br/> TAATGTTAACTAATAAAAAGTTGTATGCCTAAAAATAATAATGTATTATGTTTACATGATTGTTTA<br/> TTAAAATAATATTGAATTATTAATAATTATGTAGACATAATACATATTACATTATTATTTAATCAGA<br/> TATTGATTAAAGAAACATCCATTGTGATTTTACTTAAAAAGTTGACAATAGGGGGAAAAAATA<br/> CAATTATCAGATCAGATATGTAACAAGAAAAAAAAAAAAAAAAATCATTTAAAGTAGTATGCCTA<br/> AATTTGGTGTATGATCACTGTAAAAATTTAAAACTATATGTAAAAATTTAGTTTTAAGAACTTTC<br/> TTTAATAATAATTTACATTTTTTTTTATTAAATTATTAATAACATTTAATTACATGAAAAATATATAAA<br/> AAATAATATATTATTTTACATTTTTATTATTGGAAAGAATAATTAATAAAGCAAATTTTTTTAAC<br/> AGTATTTATTATTTAATTTGAAAGTGTAATTACAGTAACAGTACAGCATCATTTGATTACATGT<br/> AATTAAGTGTTGCCTCAATGTATTTCCAGGGCAGGCAATGGATGGTGGTGGGTACCTTTGGT<br/> GGCCCCCTTTATTGGTGGCGTGACTGGGGCTTCAATCTACAAAGCATTTGTAGAGCTACACC<br/> ACCCTGATCTTAAAAGCACTCAGACACAGTCTACAGGAGATCCTGAATGTGTTCTTTGGAA<br/> AAGTGCAAGAATGGCAGTACAGAGATATCTGTGTGAGACCATCTCAAGTTAAGGACCAAGA<br/> ATGTTACAGAGACCAAAGAAAGAAAGTGCCATTTCTACCCAGGGCAGCTGGGATGTTTACA<br/> GGAATAATATGAAACATGGATTGAAAAGCCTTTGGGGTAAAAAATTTTCAGGCAAACCTTTTCG<br/> CAGTCCAGTGTGTACTACAGTACTACCTTTTGAGCTATAAAGGGAATAAGCTACTGAAGAATC<br/> TCAGGACTCAGGATTGTCCATGTTTGATCTTTAATAAATACACACACTCACACAGACTTAAGG<br/> GCATCAATAGATGAAATTAAGCTGCTTAAGTCATGATAAATGCTCAGCATTAGCCAAAAGAAC<br/> AGTCAACACGCCTGTACGGTAGGGGTGGGCGGTATGAGACGGATAGATACATTATTTAAGGT<br/> TATTTCTATTCGTTATGATATTGATATATTGTTGTCAAGTAAGCCCCGTTGCGAGCATGTGCATT<br/> CCTCTAAACTGTCTGGGGGCTGCACTGCTGCGCCTTTCCCCCCCCGAAAATATCACATTAACA<br/> ACAACCCTTTAGAAAACGTAATTCCTTTCTGGATCCTCTTGATCTGCTTTCTCCATGTTTCTTT<br/> GACATTTTCTACCGCGGTAACGATATATACCGTCATTCCGCCCAGCCCTACTATGGGAACAGT<br/> CAGTGGGCATTTGTTGGGACAGCGGGGTACCGTTTTAGTCACGCTGTGTCTCCACGAGACCC<br/> CCTGTCCTTTGGCTGTACTGCCGCCACTCGCGGGGACCTGTGCTGGCTGCTTCTTCTTGGA<br/> GTGGGTGGCTTGGCCTTGCCGCGGAATGCCTTGGCTGGGTCCAGCTTGTTCATAAAGGTTT<br/> ACTGGATGTGTCAAGATAGGGATCACCATAGAACGTCAGGGGTTGGTAGAGAGCGGCCATT<br/> GCTGTATCAAGAAATCAATGGAGAAGTT </p> <p> ATGAAACAGGAAGTCAACATAATGGAGGACGGTTTTCAAGGCCATATGGCACCTACTGTGGT<br/> ATCCATGTTGAAGATCAAGAATGAATGCATTGAGTGGTCCTGGCAGAGACCCTCTGCACAT<br/> TTGTCATGATGGTGTTCGGCCTTGGCTCTGTTGCACAAGTGGTCACAGGAAATGGTTTCTTC<br/> GGAGATTACCTCAGCATGAATATAGGCTTTGGACTGAGTGTGGCTATGGGTGTGCACATTGGT<br/> GGAAAAGTGTGAGGAGCTCATATGAATGCAGCTGTTTCCTTCAATGTGTGTGTTTCGGCCG </p> |
|--|----------------------------------------------------------------------------------------------------------------------------------------------------------------------------------------------------------------------------------------------------------------------------------------------------------------------------------------------------------------------------------------------------------------------------------------------------------------------------------------------------------------------------------------------------------------------------------------------------------------------------------------------------------------------------------------------------------------------------------------------------------------------------------------------------------------------------------------------------------------------------------------------------------------------------------------------------------------------------------------------------------------------------------------------------------------------------------------------------------------------------------------------------------------------------------------------------------------------------------------------------------------------------------------------------------------------------------------------------------------------------------------------------------------------------------------------------------------------------------------------------------------------------------------------------------------------------------------------------------------------------------------------------------------------------------------------------------------------------------------------------------------------------------------------------------------------------------------------------------------------------------------------------------------------------------------------------------------------------------------------------------------------------------------------------------------------------------------------------------------------------------------------------------------------------------------------------------------------------------------------------------------------------------------------------------------------------------------------------------------------------------------------------------------------------------------------------------------------------------------------|

|                         |                                                                                                                                                                                                                                                                                                                                                                                                                                                                                                                                                                                                                                                                                                                                                                                                                                                                                                                                                                                                                                                                                                                                                                                                                                                                                                                                                                                                               |
|-------------------------|---------------------------------------------------------------------------------------------------------------------------------------------------------------------------------------------------------------------------------------------------------------------------------------------------------------------------------------------------------------------------------------------------------------------------------------------------------------------------------------------------------------------------------------------------------------------------------------------------------------------------------------------------------------------------------------------------------------------------------------------------------------------------------------------------------------------------------------------------------------------------------------------------------------------------------------------------------------------------------------------------------------------------------------------------------------------------------------------------------------------------------------------------------------------------------------------------------------------------------------------------------------------------------------------------------------------------------------------------------------------------------------------------------------|
|                         | <p>TTTGCCTGGAAGATGCTGCCACTGTATGTTTTTCGCCAGTTTCTGGGTTCCCTTCCTCGCTGC<br/>CGGGACCATTTTTTCACTTTATTACGATGCTATACATCATTACTGTGGGGGCAATTTCACTGTG<br/>TCTGGTCCCAAAGCAACAGCTGGGATCTTTGCCACATATCCAGCACCTTACATCTCAATCTAC<br/>ACTGGATTCTTCGACCAGGTTGTGGGCACCGCCATGCTGTTGCTGTGTCTGATGGCTCTGGC<br/>AGACCAGAGAAACCAGCCGGTTGTGGCTGGAGGTGAGCCTGTTGGTGTGGGGCTCGTGGTG<br/>CTGCTCATTGGTGTCTCTATGGGGAGCAACAGCGGCTATGCCATCAATCCCACACGAGATCTG<br/>GGGCCAAGAGTCTTCACACTGATGGCAGGTTGGGGCATGGAGGTTTTTCAGGGCAGGCAATG<br/>GATGGTGGTGGGTACCTTTGGTGGCCCCCTTTATTGGTGGCGTGACTGGGGCTTCAATCTACA<br/>AAGCATTTGTAGAGCTACACCACCCTGATCTTAAAAGCACTCAGACACAGTCTACAGGAGAT<br/>CCTGAATGTGTTCCCTTTGGAAAAGTGCAAGAATGGCAGTACAGAGATATCTGTGTGA</p> <p>MKQEVNIMEDGFQGHMAPTVVSMKIKNECIRVLAETLCTFVMMVFGLGSAQVVTGNGFF<br/>GDYLSMNIGFGLSVAMGVHIGKVS GAHMNAAVSFTMCVFGRRLRWKMLPLYVFAQFLGSFLA<br/>AGTIFSLYYDAIHHYCGGNFTVSGPKATAGIFATYPAPYISITYGFFDQVVGTA MLLLCLMALAD<br/>QRNQPVVAGGEPVGVGLVLLIGVSMGNSGYAINPTRDLGPRVFTLMAGWGM EVFRAGNGW<br/>WWVPLVAPFIGGVTGASIYKAFVELHHPDLKSTQTQSTGDPECVPLEKCKNGSTEISV</p>                                                                                                                                                                                                                                                                                                                                                              |
| Lw_Aqp8aa<br>(OQ301588) | <p>CTTTATCAGTAGAAAGCTGCAGTGTCCGTGTGCACAGAACACCTGAAGCTTCGGACAGACA<br/>AAATGACCTCAGTGGAGTCCAAAGCAGATCTCTTTACAGTAGCCACAGGCGATGGAGGGGA<br/>CAACCATCAGAACACGCAGAGAAGTCTTCTTTGAGCACTACATTCAGCCGTGCCTGGCA<br/>GAGATCCTCGGCTCCACTCTCTTCATGTTTCGTGGGCTGCGTGTGCGTCATGGGGAACGTGGG<br/>CATCAGCGGGAGCATCCAGCCTGCACTGGCACATGGACTAGCACTGGCCATAGCAATTGCCA<br/>TTTTTGGAGAAATCAGGTAACAGCCTTATGTTCTGTGTTCTTGAGTTATGAAATGGCTAGACT<br/>TTAAACAGAGAAAATAAATAATGTATTATAAACTATGTTGATACTATTTATATTATATGCTT<br/>GTTATATTTACAGTATTTAAATTAGATTTTCAGTGAGTAAAGAATTTTTTTATATATTTTACATTAT<br/>GCACGCATTATTATGATTACTATGCAAAATAATATATTTTATTCTTTATTATTTTAAAAAAGAAA<br/>ATACAATTTAATGAATAAAGGATCATTTAATATTTTCATTTTTTCATTTAAATTTTTTTCTTTTCT<br/>TTCATGCTTGATTTTATGATGTCACCATCTTGTTTTCCAGCGGTGGTCACTTCAATCCGGCCGT<br/>GTCTGTGTGTGTTTACCTCATCGGAGGAATGGAAGTATGCTCCTGGTGCCATACGTGCTCTC<br/>TCAGATGTTAGGTGGAGTGATTGCTGCCGGTCTTGCCAAAGTATGTGTGCAAGCTTCTCTATG<br/>GATATTTGTATCTGTGTTTATGACTTATTGCTCAAAGTCTGGAAGCATACAATCTTTTACACT<br/>TTTGACAATGCAATATAAACATTCTCTTTTCTTTTCTTTAGGCTGTCACCTCGGATGAGGCAT<br/>TTAGAAATGCAACTGGAGCAGCGTTTGATGCCGTTCACTCCTCTCAAGGCGTTGGCTCTGCG<br/>ACAATGGCAGAGATGATAATGACGCTTTTTTTGACTATAGTTGTCAGCATGGGTGCCGTAAAC<br/>GGAAGGACCCGAAGTCATCTCGCTCCCTTCTGCATTGGACTCACCGTGACTGCAAATATTTT<br/>GGCTGGGTAGGAAACTAACATTTACACAAAAGGCACAAACAAATGATATAGCCTACTGTAAA<br/>GAATACTATGCCACACTAAAATCTAGTCTAGTTTTTTGAGGCCATAAAGAGCATTGGGTTAA</p> |

ATATTTATTTACAATTGTTCAAACATCTACATCTGCATCTATACCTCGAGTTTCTTTTCATATAATA  
TTCCTATATATATATCTGAAACAGATGAAAGTAGTTTAGAATTCTACTTATACCTGAACTGTGTA  
GATTACAGTTTTTTTTATTTCGCTTTGGTACAATTTTCACAAGTAAGGTGTACATTTGCAAACTC  
CAAACCTGATCACACTTGTATCACAGCTAGTCATTCTTTCAAACCTGATCTCATGCTTTCATTCT  
TACTTAATCACTGTTTCAAACACAAGATCATTGTGATATGTAATGAGAACGGTTGGTTTAGT  
CACTGAAACACATGATCTTCTTTCAATTTAGTACTTTTAAACAATCAGTTCATTCAATAGCAAA  
CAATGCAAGATACATGTTTCAAATCACCTTGTGTTGCTAAAATAATTACAATAATACAGGCTATG  
TCACATATACATAACCTAACTTATGTAATTGAATACAAAATGTTTGTAAATAGTATCTATCAAGTG  
TGTTATCAAAATGTGTGATGAAGTTATGCAATGGCCATTAGGTTTTGTGCTAGAACGAGTTTG  
CTGGCAATATATTAATGTTCTCACTTTGCCATATGACTGAATCTATACTATGAGTTACAGTAAT  
GGGGCAGTCTCTACCATGGTAATCTGTTACAGTATCACATGGCATACTATCATGTAAAATGTTG  
TATTTGATGCCATCTGTCTCCCTTCTACTGATGCATCTCTGATCATTATATAGATGAAACACTT  
ATTTTGTGTAGTGAAAAGAATACTTTGTAATTGAATTGAAAGTATGATGAATTTTCCACTTTGA  
AACAAGTGTAGCGACTTGTGAGATAACATCTGCTTATAAAAGCGCATGAAACATATGATGAC  
AGTTAGGGGAGATCAGGGAGTAACGGAATAAGATCAAATATTTCAACGTTTCACTGATTAGA  
GATGAGCTACTGGGTTTGGCGGGTTAAAATCACTATCATACATTAACACCACCCTGAGGGGA  
GTCAGGGGACAGCAGTACACATTTTTTAAAAGTAAAATCTGATGATGATCACTTTTGATGATC  
TGTTGTGATATTAGTACTAAGAGTTTTGAAAATGTACTAATTACTTGTGAAAATTACGTCAA  
GCAAAAAAAAAAAAAAAAAAAAACTGTAGTGTAAAGTACAACGAGTCCAAAGAGTGTTAC  
TGTAACACAACCTGTTATACAGTTATACAGACTTTTAGACGTTGTTATTCAAATGCTGATTTAA  
TAATAAAAAAAAAACAAACAGGAAACATATTAATTCAAATCAGCAAATAAAATGGAAAAATA  
GAGAACAAATACAATCTAACAACCTCTAAACATGTTTTGTTTATGTTTATAATGTTTACATGTTA  
AAAAAGCTATGTTTTTAGACTATGTTGTTGTATAGTATAATTCTAATATTATAATTTTTATATTAT  
ATTTTAAAGTTAATTACATTATAATTATCCATATTATAACTTGGTGGAATTTATTGCTGAACTTG  
CTATAATTTGCTTTAAAAATATATAAATCTAGAAATATTATGGCTTAGCAGACAGGGAGGATAT  
TCTGGCAAAAAATTAACATAGAAATATAATAATTATATAATACTATTAATTACTTCTATTATTAC  
TGATAACAATTAATACTATTTCTACCATTTAACAACCATAAATATTATATATTTTTTAGATTTTAC  
TTTAAAAAATGTGTACTGCTGTCCCTGACTCCCTCAGGGTGGTGTACTGTATGATAGTG  
ATTTTAAACCCGCCAAACCCAGTAGCTCATCTCTAATCAGTGAAACGTTGAAATATTTTATCTTA  
TTCCGTTACTCCCTGATCTCCCTAACTGTATCATATGTTTCATGCGCTTTTATAAGCAGATGT  
TATCTCACAAGTCGCTACACTTGTTCAAAGTGGAATAAAGTGCCTTTGAGGAACATGGC  
AACCAAAACAAACAGGATATTTACAGGAAACAAAGACACCAGGAGCCTTAGAATAATAATG  
GCAAAAGGAAATATTAATTCCTAACCTAAAATGTGCTGATGTGCTATATTTGGGGTCATTTTT  
TCAGTTTTGAGAACTCTGATTTAACTGATTTTGTCTTGCATGTCAAACAGGGGTGGAATATC  
AGGAGCATGTATGAATCCAGCACGGGCCTTTGGGCCAGCGATAGTGTTTCGGTCACTGGACGT

|                         |                                                                                                                                                                                                                                                                                                                                                                                                                                                                                                                                                                                                                                                                                                                                                                                                                                                                                                                                                                                                                                                                                                                                                                                                                                                                                                                                                                                                                                                                                                                                                                                                                                                                                                                                                                                                                                                     |
|-------------------------|-----------------------------------------------------------------------------------------------------------------------------------------------------------------------------------------------------------------------------------------------------------------------------------------------------------------------------------------------------------------------------------------------------------------------------------------------------------------------------------------------------------------------------------------------------------------------------------------------------------------------------------------------------------------------------------------------------------------------------------------------------------------------------------------------------------------------------------------------------------------------------------------------------------------------------------------------------------------------------------------------------------------------------------------------------------------------------------------------------------------------------------------------------------------------------------------------------------------------------------------------------------------------------------------------------------------------------------------------------------------------------------------------------------------------------------------------------------------------------------------------------------------------------------------------------------------------------------------------------------------------------------------------------------------------------------------------------------------------------------------------------------------------------------------------------------------------------------------------------|
|                         | <p>ACCACTGGATATATTGGGTGGGACCTTTGACTGGTGCTTTGGTCACTGTCAGCCTTGTGAGGT<br/>ATCCTTGCAACTCACTTTTTCCCTTGACACAATGAATGATTTTCGTCATTTAGGAGTATTTTAGTG<br/>TATCAGCTTAAACAATATATGATGACACAATATGAAGCCATTCACTGAAATAAGAATTAATA<br/>TTTGATATGCGTTTTATGTGTTTATAGCATAAAACCTTTTCATCTTAATATGTGAGTATGAGTATT<br/>CTAATCAATTGCTTGATTCACTTAGGTTGATAATGGGAGACAAGAAGATTCGTGTTATTTTCA<br/>AATGATGGAGATGAAGGACCTCTGAGGATCCTGCAATGTTGCAAGCTTTTTAAATTCAAGAG<br/>TATTTGTAAAGCATTGTATGATATTGTCAAACATTTATATTATTGCAGTTTTCTAAACTTTTCTG<br/>TATTCTGATGCTTCATTGTCTTTTTGACAAATGTATTGTTGTTTTAGTTTTATAGCCTGCCATTA<br/>TGTATTCTGATGTTTTATGTTAATAAGCATAAAGTCTTTTCTTATATATTGCCTGAATGTATTCT<br/>TCACTTTGCAAAATGTAAA</p> <p>ATGACCTCAGTGGAGTCCAAAGCAGATCTCTTTACAGTAGCCACAGGCGATGGAGGGGACA<br/>ACCATCAGAACACGCAGAAGAAGTCCTTCTTTGAGCACTACATTCAGCCGTGCCTGGCAGA<br/>GATCCTCGGCTCCACTCTCTTCATGTTTCGTGGGCTGCGTGTGCGTCATGGGGAACGTGGGCA<br/>TCAGCGGGAGCATCCAGCCTGCACTGGCACATGGACTAGCACTGGCCATAGCAATTGCCATT<br/>TTTGGAGAAATCAGCGGTGGTCACTTCAATCCGGCCGTGTCTGTGTGTGTTTACCTCATCGG<br/>AGGAATGGAAGTGTGCTCCTGGTGCCATACGTGCTCTCTCAGATGTTAGGTGGAGTGATTG<br/>CTGCCGGTCTTGCCAAAGCTGTCACTTCGGATGAGGCATTTAGAAATGCAACTGGAGCAGCG<br/>TTTGATGCCGTTCACTCCTCTCAAGGCGTTGGCTCTGCGACAATGGCAGAGATGATAATGAC<br/>GCTTTTTTTGACTATAGTTGTGAGCATGGGTGCCGTAAACGGAAGGACCCGAAGTCATCTCG<br/>CTCCCTTCTGCATTGGACTACCGTGACTGCAAAATTTTTGGCTGGGGGTGGAATATCAGGAG<br/>CATGTATGAATCCAGCACGGGCCTTTGGGCCAGCGATAGTGTTTCGGTCACTGGACGTACCAC<br/>TGGATATATTGGGTGGGACCTTTGACTGGTGCTTTGGTCACTGTCAGCCTTGTGAGGTTGATA<br/>ATGGGAGACAAGAAGATTCGTGTTATTTTCAAATGA</p> <p>MTSVESKADLFTVATGDGGDNHQNTQKKSFFEYIQPCLAEILGSTLFMFVGCVSVMGNVGISG<br/>SIQPALAHGLALAIAIAIFGEISGGHFNPAVSVCVYLIGGMELMLLVPYVLSQMLGGVIAAGLAK<br/>AVTSDEAFRNATGAAFDAVQSSQGVGSATMAEMIMTLFLTIVVSMGAVNGRTRSHLAPFCIGLT<br/>VTANILAGGGISGACMNPARGPAIVFGHWYHWIYWVGPLTGALVTVSLVRLIMGDKKIRVI<br/>FK</p> |
| Lw_Aqp8ab<br>(OQ301591) | <p>GTGATTTATGGTGGAACAAGTCAAGTTGGCTCTTTTATCATAGTGCTTCCCTCTGCCACACAG<br/>TCACAAAGTTACTCATTGCTCTTGATGGTGACAATGTCAGTGGAAGTAGAGAAGCTAGAGC<br/>TCAAAGAGCTGGACAAAACCTTGCTGAAGAAGAATGAATCCTCACCCAAACCTCAGAGCAA<br/>ATATGAAAGAATAATCCAGCCATGTGTTGCCGAGCTGGTGGGCACAATGTTTTTTGTCTTCAT<br/>TGGCTGCGTATCTGTCAATTGAAAATGTGGAGGCAGCAGGAAGACTACAGCCAGCACTCGCA<br/>CATGGTTTGGCAGTGGCTGTGCTGGTGGCGTGTATGGCAGAAATCAGGTAAGAATAATTTATT<br/>TTAAGGTGTCCTTGTTTCATTAAAGTACTGTTTATAACAACATATTGTATACTTATTGGGTTAGG</p>                                                                                                                                                                                                                                                                                                                                                                                                                                                                                                                                                                                                                                                                                                                                                                                                                                                                                                                                                                                                                                                                                                                                                                                                                                                                                                                                                         |

ATTAGGGTTTAGGGTTATTTGCAAGTAATTATGCATAATATATCCCCATACTTACAAATAACATA  
AGGACAATTAATAAAGTGTTACAGATTTTTTTTTTATACATATATATTTTTATGCACCTCTTTT  
GATTTGTTCAATTATTTTTGAGTGCTGAAAGGGATGTTTCTGAATCCCTATCTGAAAGCAAGT  
GCTTTTATATCTCACCTGAATGCTTTTTTTTTTCTCTCTCCATGCAGCGGATCACATTTCAACC  
CTCCGTTACCATCGCTATCTGGTTGTGTGGTGGACTTCAGCTGACGATGGTTGTTCCCTACC  
TTATCAGTCAGATGATCGGAGGTGTGCTGGGAGCTGCAATGTCAAAGGTGTGAACAAGAATA  
CACTAAATACAAGAACAGAAAATAATATTGCTGGTACTTTCCATAACACAAAAAAGTGCTCA  
ACAGAGAATGTGTTTTCAAGGTTATGACATCACACGAGAAGTACATGAATGCTACCGGAGGG  
GCCTTTGCTGTTCTGAAGTCTGATGAGCAGCTGGGGAAGGTTGTGTTTGCTGAAATGGCCAT  
GACATGTCTAATAACCATGGTAGTCCTAATGGGGGCAGTCAATGGAAAGAGCAAAAGCCCCA  
TGGTGCCCTTCATGGCGGGCTGCACTGTTATCATCAATATTCTGGTGGGGTGAGTCTACCAA  
TCAAGCTCAAATTAAGCAACACTAAGTAAAAAAAATTCCTTAAATAATGTTTCCAAAAT  
CGTATCAGTGGTTCATCAAGTCGTAACAGGGTGAAAGGCACTTTTGTATTGCTTTGCACCCC  
TATATCTGCTATAACCACACTATGCAAGTTTGCCAAACCGGGTCGCGTTTCTGTAGTTCGAAT  
GAGACATAAGAAAACGAAAAATTTTACTTGCTTTACGTCAAGCGTTATAATAGTCATTATTTA  
GTTTTTCTTCGTTTCTGATGTCGCAATACATCATACTTTAATGAAATCATGCGACATACTCTAC  
CTCGTCTGTGGACATCGTTCATTCCAAAGCCGACGCTGGATAAACAGCGAGCGTGCGTGCGA  
CAGTAGACTGCGGGCGGCGAAATTATTTACGACAGCGGTAATGGACAATTCGCTTCCAACC  
TGTAGGGCGACCGAAGAGGAAAAGTTCCTTAGTGTTGCTTTAAGTTAACAAGTTTTTGACCA  
GTGAGTTTTGGAGGCTAATAGGCCTACGTGTTTTGTCTTCATTAACTGCCACATCTGAGGC  
AGTAGTAGCTATATGTCGCATTAGCTACGTTTTCAACTTATACATTTATAAAGTTTATTGTAGCT  
ATATGGGGCTCAGTACTCCAGTAGGGGTTCAATCTTCAGCTGGCTGGCTGTTGCAGCCACTG  
GTATGTCACGTGACCTGTCAGTGGCTGGCTGGCACTTTGGCAAGTTTCAGAAACCATTGATT  
TTTGGCAGTTTTTTACTAAATGTGGAGAGAGGCTATGAGTTTTCTGCCCATTTAAAATTGTTT  
ATTTAAATTTGTCTTACAGAGTTTTAGCATTAGAGTAAATATATATATATATATATATATATAT  
ATATATATATATATATATATATATATATATATATATATATATATATATATATATATATATAT  
TATTTTAATAGAGGAGATGTTTCTGGCACCTGTCTGAACCTGCAAGAGCTTTTGGACCTGCA  
TTGATGGCTAACTACTGGTCTTATCATTGGGTTTATTGGGTCCGATAGGGGGAAGTCTG  
GTGGCTGCTGCTCTTGTGAGGTTAGTTTGCCTTGATATTAATATGCCATATTTCTTGTGAG  
GTCTTCCATGCAAGAAATTATTTTTTACAGCAGACTGTAACCTCATTTATTTTTTACAGGCTTC  
TGCTTGGAGATGAGAAGACACGAGTTATATTGAAATGATATTGGAGCACATCAGCATGCGAA  
ACCTCTCAATTCATGATGCCATTGTTACTTCTAAACACTCTAAATATTTTATGTCTATCTTAACT  
GCATATTTGCTATTGAATTAATAAAGTGTGGCTTACTGTGCTTGCCTTTTATAACAAATGACCA  
ACCTTTTTCTTCTTTCCAGCAGATGTCAGTAAATTGTCTGTTGATAATGTTTCACATAAAATG  
TTTTAGCCTATCTCAGACTGTATGGAATTTACTCGAAATAAAGTTGATTCCATATTTTTACATTA

|                        |                                                                                                                                                                                                                                                                                                                                                                                                                                                                                                                                                                                                                                                                                                                                                                                                                                                                                                                                                                                                                                                                                                                                                                                                                                                                                                                                                                              |
|------------------------|------------------------------------------------------------------------------------------------------------------------------------------------------------------------------------------------------------------------------------------------------------------------------------------------------------------------------------------------------------------------------------------------------------------------------------------------------------------------------------------------------------------------------------------------------------------------------------------------------------------------------------------------------------------------------------------------------------------------------------------------------------------------------------------------------------------------------------------------------------------------------------------------------------------------------------------------------------------------------------------------------------------------------------------------------------------------------------------------------------------------------------------------------------------------------------------------------------------------------------------------------------------------------------------------------------------------------------------------------------------------------|
|                        | <p>TCAGTGTGTTTAAAAGTATTGCACATATCAACATTAATACTGTTTGTGGAGCATTCCCTGTATT<br/>TAGTTCAAAACAAGTTTCTGTATAAACCATATCAATCAAATGTCTAAATGTTTGTCTTCTG<br/>GCAGACACCATAAACCAACCAAAACCGATTATAGGAATAATATATAAAA</p> <p>ATGTCAGTGGAAGTAGAGAAGCTAGAGCTCAAAGAGCTGGACAAAACCTTGCTGAAGAAG<br/>AATGAATCCTCACCCAAACCTCAGAGCAAATATGAAAGAATAATCCAGCCATGTGTTGCCGA<br/>GCTGGTGGGCACAATGTTTTTGTCTTCATTGGCTGCGTATCTGTCATTGAAAATGTGGAGGC<br/>AGCAGGAAGACTACAGCCAGCACTCGCACATGGTTTGGCAGTGGCTGTGCTGGTGGCGTGT<br/>ATGGCAGAAATCAGCGGATCACATTTCAACCCTCCGTTACCATCGCTATCTGGTTGTGTGGT<br/>GGACTTCAGCTGACGATGGTTGTTCCCTACCTTATCAGTCAGATGATCGGAGGTGTGCTGGG<br/>AGCTGCAATGTCAAAGTTATGACATCACACGAGAACTACATGAATGCTACCGGAGGGGCCT<br/>TTGCTGTTCTGAAGTCTGATGAGCAGCTGGGGAAGGTTGTGTTTGTGCTGAAATGGCCATGACA<br/>TGTCTAATAACCATGGTAGTCCTAATGGGGGCAGTCAATGGAAAGAGCAAAAGCCCCATGGT<br/>GCCCTTCATGGCGGGCTGCACTGTTATCATCAATATTCTGGTGGGAGGAGATGTTTCTGGCAC<br/>CTGTCTGAACCCTGCAAGAGCTTTTGGACCTGCATTGATGGCTAACTACTGGTCTTATCATTG<br/>GGTTTATTGGGTCGGTCCGATAGGGGGAAGTCTGGTGGCTGCTGCTCTTGTGAGGCTTCTGC<br/>TTGGAGATGAGAAGACACGAGTTATATTGAAATGA</p> <p>MSVEVEKLELKELDKTLLKKNESPKPQSKYERIIQPCVAELVGTMMFFVFIGCVSVIENVEAAGR<br/>LQPALAHGLAVAVLVACMAEISGSHFNPPFTIAIWLCCGLQLTMVVPYLISQMIGGVLGAAMSKV<br/>MTSHENYMNATGGAFAVLKSDEQLGKVVFAMAMTCLITMVVLMGAVNGKSKSPMVPFMAG<br/>CTVIINILVGGDVSGTCLNPARAFGPALMANYWSYHWVYWVGPIGGSLVAAALVRLLLGDEKT<br/>RVILK</p> |
| Lw_Aqp9a<br>(OQ301589) | <p>ATGAAGCATCACTGCGCCATCAAACACAGCATCTTCAAAGAGTTCCTGGCCGAGTTCCTCGG<br/>GACCTTCGTGCTGGTGGTGAGTCTCCGCTCGTTCACCTCAGACAGAACTTTATTAAACAGCT<br/>TTATTTGACACAGACTGACAGAAGTATTTAACTAATAATCTATTGATATCTGAGTATGTATTGTT<br/>GTTGTATGGTTTCTGATGATTTTGTCCCTGTGGTGTGTGTGTGTGTCAGTTGTTCCGGCTGCGG<br/>GTCGGTGGCCCAGACGGTGTGAGCAGAAACACTCTCGGCGAGCCGCTGACGGTCCACATC<br/>GGCTTCAGCACTGGACTCATGATGGGTGTCTACGTGTCCGGCGGCGTGTGCGGTAAATCACA<br/>CACATACACACAACCTCACGCCAAACACACAGCAGCTTCCACAGGTTAGGTAACATCTCAC<br/>ACACACACACATAAAAAACATGATGCTCTTCCTCAGTGCTTCTGTCTCGTTTTCCAGCACA<br/>GATATCTAAACATTCTTATATCAAGATACATTTACTGGAGAAGAACAATGGCTGAAGATATTAA<br/>GTCTTGTTTTCGGAATTAAAAATGAAGTGAGTTTGTGCTTAAAACAAGAACAATATCTGCCA<br/>ATGGAGTCAATTATAATGTTTAGATGTTTCTGCTGAAAAATAGGAACACAGAGGAAGAGCCT<br/>CATGTTTGTAGTGTATGATGTCGTGGGGTTGTTGTCATGGACACACACGTGAGCCGGAATAA<br/>CACCATCTGATCATTGATTTCCAGAACGGATCTATAAATCCTGTTGGTCCACATGAGTTGA<br/>CGGTTGTTTGGTTCTGTTTGTGTCTAGATGAATCTCTGTCTAGGTGAGACGACTGTGATGTTT</p>                                                                                                                                                                                                                                                                                                                                                                                              |

[illegible]

TCTTTTTACCATCTGTGTTATTATGGTGGATGTCAATATTAAGGTACAAAACAGATTTTAGTA  
TCAAGCACAGACAAACAACACGCCTTGTTAATTCAGAAAAGATGGCTGATGGATTTACCCAT  
ATGTTTTTTATTTTAATAAAAAAAATTTTTTTTTTAATGATTCTGTATTTACAGTGTGAGCTAT  
TAATGTTTGTGTGTCAGGCGGTACCTCAACCCGGCCGTGTCCCTGGCAATGGTGATTCTG  
GGGAAGCTGAAGATCTGGAAGTTTCCCATCTATGTGATGGCGCAGATGCTCGGGGCGTTTCGT  
CGGGGCCGCCGACGTGTTTCGGACTGTATTACGGTGAGTTTGGTGGAATCCAGCGGTTCCCCG  
TGTGTTTCGGATCTGATTAATGCGTGTGTGTTTTCGTGTTTCAGATGCCTTCATGGAGTTCACC  
AGCGGGATCCTCTCGGTGACGGGGATCAACGCCACAGGACACATCTTCGCCTCGTATCCGGG  
GAGACACCTGACCGTCCTGGGTGGATTTCGTGGATCAGGTCAGTCTGAACCCAGTCCGGGTC  
TGAATCAACACATTTCAGTGAGTGTTTGACGGCACAGACTGACCGCAGTAACCCAGACCTGA  
CTAAAGCACATGGATCAGCTCAACGTTTCTAACCACAAAACACAACAATCCGTTTTGAACCGG  
TGACCTGATTTCAGATCCTTCTAATTAACAAGTGTTTTCGTAAACTTGTCTCCGGCTGGAGTGAC  
TGACCTGAGCTCCGTCTGTCAGGTGGTGGAACGGGAATGCTGGTTCTCTGTATTCTGGCCA  
TCGTGGACGGGAGGAACATCGGCGCCCCTAGAGGCGTGAGCCGCTGGCCGTGGGCCTGAT  
CCTGCTGGGCATCAGTGTGTTCGATGGGCCTGAACTGCGGATACCCCCTGAACCCCGCGCGAG  
ACCTCGGCCCCGAGACTCTTCACTGCTGTGGCCGGGTGGGGGATGGAGGTGTTTCAGGTGTGT  
AACTGCACACACACTTTACACAGACTGGTTACACACAGACTGGATACACAGACTGGTTACA  
CAGACTGGTTACACACAGACTGGTTACACAGACTGGTTACACAGACTGGTTACACACAGAC  
TGGTTACACACAGACTGGATACACAGACTGGTTACACAGACTGGTTACACACAGACTGGTTA  
CACAGACTGGTTACACACAGACTGGTTACACACAGACTGGATACACAGACTGGTTACACAC  
AGACTGGTTACACAGACTGGTTACACACAGGCTGGTTACACACAGACTGGTTACACAGACT  
GGTTACACAGACTGGTTACACACAGACTGGATACACAGACTGGTTAAACACAGACTGGTTA  
CACAGACTGGTTACACAGACGGTCTAATTAACCTCACACTCTCACACACACACACACACACA  
CACACACACACACACACACACACACACACACACACACACACTGACACACACACACA  
CACACACATTCTCACACACACACATACTTGCACACTCAGACTTACACACTCAGACACACA  
CACACACACACACACACTAACCTTGATTGATCAGTAGGCTTGCTGCTATAGTCGGTGTTT  
ATTAGCATCACCGGTTAATTCACCTTGCCACCGTGCGTCCGCCCCCACCATCGTTTTGATTTG  
TCATAGTAATAAAAAATAATTTAGTGAACAGACACTGCAGTTAAAACCTGAACATGGTCGCAGC  
CGGAGTCAGATCTCACCTCACTCTGCCTCACTATTCACTGTCAAGATGATGGCGGAAGATTT  
GGTTACAGAGCGAAATGGAAAAGCGTCTATTTAAGCGAGTTTGTCTGTTCTGTTGTGTTTTTC  
ATTCAGAATAATAATAAACCCATCATTCAAGCAACTGCACCTGAATTGGCGCTAATTCAAAG  
CGAAAGTAAATGCACACGGGCATTAGTAACGGAACGTGTCCACTGGTGCGGAGCGAGTGT  
GTGTGTGTGTGTGTGTGTGTGTGTGTGTGTGTGTGTGTGTGTGTGTGTGTGTGTGTGTGTGT  
AAACGCTCGCTCTGCTCCGCACTGTTATGATTTACACTGAGGCTAATTAGCTATTTAAATGTG  
AGGTGCAAAAGAGGGAAAAACGCCAACGCCCGGTATTCCAGTTTTACTAGTGTTAGTCGATT

|                        |                                                                                                                                                                                                                                                                                                                                                                                                                                                                                                                                                                                                                                                                                                                                                                                                                                                                                                                                                                                                                                                                                                                                                                                                                                                                                                                                                                                                                                                                                                                                                                                                                                                                                                                                                                                                                                                                                                                                                                                                                              |
|------------------------|------------------------------------------------------------------------------------------------------------------------------------------------------------------------------------------------------------------------------------------------------------------------------------------------------------------------------------------------------------------------------------------------------------------------------------------------------------------------------------------------------------------------------------------------------------------------------------------------------------------------------------------------------------------------------------------------------------------------------------------------------------------------------------------------------------------------------------------------------------------------------------------------------------------------------------------------------------------------------------------------------------------------------------------------------------------------------------------------------------------------------------------------------------------------------------------------------------------------------------------------------------------------------------------------------------------------------------------------------------------------------------------------------------------------------------------------------------------------------------------------------------------------------------------------------------------------------------------------------------------------------------------------------------------------------------------------------------------------------------------------------------------------------------------------------------------------------------------------------------------------------------------------------------------------------------------------------------------------------------------------------------------------------|
|                        | <p>AACCGGTGGGAATATTCCCTCACTGTACACCCCTATAGATCAGCTCATTACATAATATCACAT<br/>GCACTCAAGAGATTTAAATGTGACTGGATGCAGAATCACATTATCTCTATCTCACACACACAC<br/>ATTTGTTTGACTATATTAGTAAGTTCATCTCATAGAATTCTATTGATTCTATTTATTACTGAGTCT<br/>AACCTCACAGAAACCCGTGCGAAACACTAGGTTTAAATGAAAAAATGATTTATAATCCTTT<br/>TTAACTGAGGATACATCAAATGTAGTTCTGATGGCTGATGAAATGAATAAGTGCTGCTTTATC<br/>TGTGATTTTAAAGATGCTGCAGAATCACATGTGATATATTGTGATGGTTGTGTGTGTGTGTGTG<br/>TGTGTGTGTGTGTGTGTGTGTGTGCAGCACTGCAGATTACTGGTGGTGGATCCCTGTTGCCGGG<br/>CCGCTGGTGGGGGGGGTCTGTCGGAGCTGTGATCTACTTTCTGTTGATCGAGCTTCATCACCC<br/>TAAACACAATGACAAACCTCTCGAAGAACCCGAGGAAGAGGAGGATGAGGAGGAAGACGA<br/>GGACAGCAGCCTGAAGGACAAATACGAGATGATCAACATGAGCTAG</p> <p>ATGAAGCATCACTGCGCCATCAAACACAGCATCTTCAAAGAGTTCCTGGCCGAGTTCCTCGG<br/>GACCTTCGTGCTGGTGTGTTCTCGGCTGCGGGTCTGGTGGCCAGACGGTGTGAGCAGAAAC<br/>ACTCTCGGCGAGCCGCTGACGGTCCACATCGGCTTCAGCACTGGACTCATGATGGGTGTCTA<br/>CGTGTCCGGCGGCGTGTGCGGGCGGTACCTCAACCCGGCCGTGTCCCTGGCAATGGTGATTC<br/>TGGGGAAGCTGAAGATCTGGAAGTTTCCCATCTATGTGATGGCGCAGATGCTCGGGGCGTTC<br/>GTCGGGGCCGCCGAGTGTTCCGACTGTATTACGATGCCTTCATGGAGTTCACCAGCGGGAT<br/>CCTCTCGGTGACGGGGATCAACGCCACAGGACACATCTTCGCCTCGTATCCGGGGAGACAC<br/>CTGACCGTCCTGGGTGGATTCTGTGGATCAGGTGGTGGGAACGGGAATGCTGGTTCTCTGTAT<br/>TCTGGCCATCGTGGACGGGAGGAACATCGGCGCCCTAGAGGCGTGGAGCCGCTGGCCGTG<br/>GGCCTGATCCTGCTGGGCATCAGTGTGTCGATGGGCCCTGAACTGCGGATACCCCCTGAACCC<br/>CGCGCGAGACCTCGGCCCCGAGACTCTTCACTGCTGTGGCCGGGTGGGGGATGGAGGTGTTT<br/>AGCACTGCAGATTACTGGTGGTGGATCCCTGTTGCCGGGCCGCTGGTGGGGGGGGTCTGTCG<br/>GAGCTGTGATCTACTTTCTGTTGATCGAGCTTCATCACCTAAACACAATGACAAACCTCTCG<br/>AAGAACCCGAGGAAGAGGAGGATGAGGAGGAAGACGAGGACAGCAGCCTGAAGGACAAA<br/>TACGAGATGATCAACATGAGCTAG</p> <p>MKHHCAIKHSIFKEFLAEFLGTFVLVLFGCGSVAQTVLSRNTLGEPLTVHIGFSTGLMMGVYVS<br/>GGVSGGHLNPAVSLAMVILGKLKIWKFPYVMAQMLGAFVGA AVFGLYYDAFMEFTSGILSV<br/>TGINATGHIFASYPGRHLTVLGGFVDQVVGTMVLVLCILAIVDGRNIGAPRGVEPLAVGLILLGIS<br/>VSMGLNCGYPLNPARDLGPRLFTA VAGWGMEVFSTADYWWIPVAGPLVGGVVGAVIYFLLIE<br/>LHPKHNDKPLEEPEEEEEDEEDEDSSLDKYEMINMS</p> |
| Lw_Aqp9b<br>(OQ301574) | <p>TCAGCTCTTCAACTGTCTGTCCGGACATCACATCTCACTGGCGGGGAACTATGGAGCTCGA<br/>AAACATGAGAAAATTGAGGGGCAAATGCATGTTGAGGCGGGACATCATAAGAGAGTTTCTG<br/>GCAGAATTACTGGGGACATTTCGTATTAATAGTAAGTCTTTTGCCTGTCAGAACTTCAGAACTT<br/>GTAAACTGAGATTAACAGTTTGATTACAGTAAATTCATCAGAAATATGATGAATATTTCAAGT<br/>GTAATGGACTGTTTTGTGTCCATTTTTTTTGTTTAATAATTGATCAGTCTGTCAACTTATTTTCA</p>                                                                                                                                                                                                                                                                                                                                                                                                                                                                                                                                                                                                                                                                                                                                                                                                                                                                                                                                                                                                                                                                                                                                                                                                                                                                                                                                                                                                                                                                                                                                                                                                                                                                        |



|  |                                                                                                                                                                                                                                                                                                                                                                                                                                                                                                                                                                                                                                                                                                                                                                                                                                                                                                                                                                                                                                                                                                                                                                                                                                                                                                                                                                                                                                                                                                                                                                                                                                                                                                                                                                                                                                                                                                                                                                                                                                                                                                                                                                                                                                                                                                                                                                                                                                       |
|--|---------------------------------------------------------------------------------------------------------------------------------------------------------------------------------------------------------------------------------------------------------------------------------------------------------------------------------------------------------------------------------------------------------------------------------------------------------------------------------------------------------------------------------------------------------------------------------------------------------------------------------------------------------------------------------------------------------------------------------------------------------------------------------------------------------------------------------------------------------------------------------------------------------------------------------------------------------------------------------------------------------------------------------------------------------------------------------------------------------------------------------------------------------------------------------------------------------------------------------------------------------------------------------------------------------------------------------------------------------------------------------------------------------------------------------------------------------------------------------------------------------------------------------------------------------------------------------------------------------------------------------------------------------------------------------------------------------------------------------------------------------------------------------------------------------------------------------------------------------------------------------------------------------------------------------------------------------------------------------------------------------------------------------------------------------------------------------------------------------------------------------------------------------------------------------------------------------------------------------------------------------------------------------------------------------------------------------------------------------------------------------------------------------------------------------------|
|  | AGTGGA AAAACATTATTGGCATTAAATTGACTACACTGATCCACTTAGACTAACCACA AACTGCT<br>CTCAGGTGAATAGACTCCAGATAATCTCATTTTTCTAATGAGTAGTATCTTAAATCAGCATGTCC<br>TATGTT CATGTGTTGTGCATT CATATATTGTATGTAGAAGAAACCCACAAGAGATCTTGAGATG<br>CAAACCACTCTCTCTCTCTCCAAAACCTTCGGGAGATATATCATTTATTATTTTACTCTCTGGT<br>ACCCATACCTCCTGAATCTGAGTGC GTTTCCCAACAGCAACGTTAGCCAACTATGGTCACAT<br>GTTCCGTTGTTATCAGCATAGTTCAATCAATTGTGTAAAGTCAGTGTTTCCTGAAACTTCAGC<br>TCTTGACCTGTGGTTAAAAGCACAGTTTCTTGTTTGCATGACATGCGGATTTACAGTTTTTCT<br>CAACACTTTGGCACATTTTTTCAAAACAGTCTTAACATTCTCTAAATTATGTTTCATTAAGAAA<br>GTTTGGGAGGAGCACAGTTTCTCAGCATCCCTCCACCACCCCGACTCTTGCTGGAATACG<br>GGGGTGTA CTCTGGGTTTGGGCCAAATACTGAGCCCGAGCCCTCTCCTCGGACAGCACGC<br>CAAATACGCATATCATGTACTCTTTCTGGGAAATGTTTTGTAAGTGTGA ACTTG TGAAACTGT<br>AAGTGCAATTGTCACAACCGTTTGCTTTGCTGGAACATCACAACTCTGTTGCATGTCTGCAA<br>AATGTAGTGACTCAGCCAAAACATTTAATTCAAAACCTAGTTATTGTGTCAATAAATTGGCCA<br>ATGGCACCAAAAAATAAAATAATGTTTAGAATGTTTAGATGTTTTTTTACCATGGAAATATTT<br>GTTATACAAATTTCATTTGTTTTCTTACTTTATTATTGACACTAACTGCTTTCTATATATGCAAA<br>ATGTCAGTTTTGTCTGTGTAAATACAGATTCTGAGAGTAGGTAATAATTGACTGGGAAAAGTC<br>AATACTGCAGTACACAAAAAGAAAATTAACATTTGTATTTATACAGTACATTTATTTTGCAGA<br>AATGTGTTACATGTAAACTTAAAATTTGCAGTTGCTTTTAGAACACTATTATGTCTCTCTCTAA<br>CAAGTGCATATCTTATATATCTTTCTATTGCTCTTCCATGACAAGAATTTTCAGTTTACATGTAA<br>AACATTTCTACAAAATGATGTTTTATAAACAAGTTCCGGAGGAGCACGTTCAAATAATCAAT<br>CAAGTCGTCATTAAACAATTACCATGTCTATGTACACCACTGTATGGACGAGGACACAGAG<br>ATAATGGTAACAAAGGTTTATTTAGACACTGTATGCAGCTCCGGATAGCAAGGAAGCACAAAG<br>AGGTCAA ACTCAGGGAATATAACGTTGAACTTAGAGTCTTTAGTATGCATGAAACAGATAGT<br>CACTCAGGGCAATGAGCTGGGATT CAGGAAGCTTCGCTGGTGGAGACAAACAGAACGGGTC<br>TTGATCTTGAGGTTATCCAGGTAATCGCTGATCACTGATACAGACAGAGAACACACAGAGAG<br>AGTTATGGAAAGTCTGAACTTGAGAATACTTGCGGGATCGCAGAGACACTTGGAATAACGC<br>TGGGGAGTCACAGACGTCTGAAGACGAGACCGGACAGTGAACTGTGGTGTGACTGGGGTT<br>TATATCCAGAGTGAGCGTGGCATGTGAAGTGATGAGTTGCAGGTGCAGTTAATCAGAATTCTG<br>GGTGAGTGTGATCGAGACCAGGTGTGTTGAGTTGACGCTGGCTGAGGTGTGCTGAGTGGAT<br>CCGTGACAGTCTACCCTCAGCATGAGAGGAAGTATATATATATATATTC ACTCTGTCAACTCAC<br>CTAACATTCCTTGACAGTTTTTCAGCATCCCTCCACCACCCCGACTCCTCACTCTTGCTTGTT<br>CTTTACAGCCAGGAATACGGGGGGTGTACTCTGGGTTCCGGCCGAATACCGAGCCCGGAG<br>CCCTCTCCTCGGACAGCACGCCAAATACGCATTTATTCTATCTGACTTATTTGTAAGTGTGAA<br>CTCGTGAAAATGTATTTATACAGTACTGATGTAGCTGCTGCGGTT CAGGGTGTTCCCGCATGT<br>TCAAAAATGGTGGTGATTGTGCTGACATATATATATAGTTTCCAACTTGATTGGATGATTGAT |
|--|---------------------------------------------------------------------------------------------------------------------------------------------------------------------------------------------------------------------------------------------------------------------------------------------------------------------------------------------------------------------------------------------------------------------------------------------------------------------------------------------------------------------------------------------------------------------------------------------------------------------------------------------------------------------------------------------------------------------------------------------------------------------------------------------------------------------------------------------------------------------------------------------------------------------------------------------------------------------------------------------------------------------------------------------------------------------------------------------------------------------------------------------------------------------------------------------------------------------------------------------------------------------------------------------------------------------------------------------------------------------------------------------------------------------------------------------------------------------------------------------------------------------------------------------------------------------------------------------------------------------------------------------------------------------------------------------------------------------------------------------------------------------------------------------------------------------------------------------------------------------------------------------------------------------------------------------------------------------------------------------------------------------------------------------------------------------------------------------------------------------------------------------------------------------------------------------------------------------------------------------------------------------------------------------------------------------------------------------------------------------------------------------------------------------------------------|

AATATTCTGATTTCCTATTGCATTCCAAATTCAAGTCTGATGTGAACAAGAACTAATTGTTCA  
GAGAGCTAAAACCTTATTGTTTTGAGAAAAAAAAGTCTCATTTGAGAATTGAGCCAAAGTG  
AAGTCCTTATCTTGAGCAAAATAAGCAAGCTGGCATCCAATACAATCTCTATCTTTTTATTAGA  
ATATATACATATTACATTTATATTACATATATATATATATATATATATATATATATATATATT  
ACATATTTTAGTTTGTCAAGAGATTTGAGTTATTTGACATAAAAAAGTAATCTACTCTAGTGTGT  
AAGAAGGAGTCTATGATTGATTCTGCAAAATAAAGCAACATTTTTGTTTGTGTGTGTATT  
TATTTATAAAGCACAATTAACAACGTAATGTTGACCAATGTGCTGTACTTTACACAGTAAA  
ATTACACAACCTAAAATGTACTTTCAAACAAACAGTGACTAACAACATCTGTTAAGAGCCTCT  
TACCAATTAGCCTACTGAACCAAATGCTAATTCAAGTAAATGTAATTTCAAGTTTTGTTTAAA  
ATAACCTAAAGAAGGAGCCAGTCTAAGATGTAGAGGTAGATTATTTAGTGCTTTGGAATAA  
CATGAGAACAATGAGAATTAGTCCTCAGATGTGATGTCCTTAATTTATAGCATTATAACAGCAT  
TAATTGAACTCAAAAGAATTAGTTAAAAGAAGTTATTACTCCACAGCCTGCGTGACATCATT  
CCCAACTTGGTTGAACGGCAAATTTGCAACGATACAGTGTCGGGAAACAGTCTAGCTAGTTG  
AATTCCTTCATCGTACTATGGTATTTAAGTTACGTGCTGTACGGTAAACACACACCAGCACTG  
TGAACAGTTGAAGTGCGTGGTCATCTTAAAAAAAACAATTATTACATAAAATAATAGCATTGG  
ATAATAAATATAACAATAATAAACTGTCCTTTAATTCATGTTAGCATTTTTAATACACATTA  
ATAAATATTGTTTTTATTGCAATTACACATAGAAGACGACATCAAGGAAAGCTACAAAGAAA  
AAATGCTATTATCATTATTATTAGTAGTATTAGTAGTATTAATTTGTCATTATTATTATTATTA  
ACAACAACAATAATAATTAAGGATAATGATGTTGCCTTGAGGAAAGGGTTGTGCACAGGA  
GGTATGTTGAGGGGCATAAGACCCTGTGGTTTATCCGTCAGTTGTGGCTTCTAGAATTGTGCA  
ATTGTGCATGTGTTATTTTGGTGATGCTTGCAACTGACAAGTCATGAGCTTCAGATCTGTTCC  
TCATCATATGCTGCCAGCGGATCTCGCTCCTCACTGTGTACAGTGAGCAATATATAAATCTATA  
TGCATGCAATGTTAAATATAGCCTGAGTTCTGCAGTTTAAAGTGTGCATTTGTGCATGAATAA  
GTTGGTTTGCCAGCAGCCACATGACTGTGAATGTGATAATCTTACACGCTGTGATGATGAC  
TACAGTATTGAACTAATGAGCTTTTCTGGAGCATATGTCCCAGGGTGAAGTCAGGTGTAGGC  
ACTGGCCCATCATTACTAAGCCTTTAACTCACTCTACGTGATGTACATCATGGAAATATATTTT  
TGTAATGTAATCATTCTTGTGAATGAAAAAGTGTAATTCGTGTTTTTTTAACAAAAATTATTTA  
CGTTTTACAATGTAATATGTAATGTTGCTTTTTAGATTCTTCTCTTCAATGTGATGATGAAGT  
TCAAAAGACCCAAACAACAATATTGGATTCCTGCTTAATGAATGTAATGGGACAAAACCTGAA  
ATTAAGAAAAGTGAACAAACCAGACAAGGTCCTGATTTGCTGCGTTTTTACATTAAATCAGC  
TATACCAATCAATTGGGAAATCAGTTCAAGCTTACGTGGGTCAGGAAAGGCCAGTGTTTTCC  
ATTCTGTTTTGCTGGCATGAGAGCTGAAGCGGTGTGTACAGTGGGGGTCACAGACAGTTCTA  
CAGGCCTGAGCACTCTTATGTCAAAGCAGAGTTACTCCTAAGCCCTGCTGTGATGTCAGAAC  
ACTCAGCCAGATTATGTGAGACCCAATTCCTCACTGACTTCCTCGACTACTTTTTGTAGACAGT  
GTTTATGAGGAACCTCTTGATTAAAGAGGGGGTAAAGTGAGAGCATATACCTAGCAGTGAGA

|  |                                                                                                                                                                                                                                                                                                                                                                                                                                                                                                                                                                                                                                                                                                                                                                                                                                                                                                                                                                                                                                                                                                                                                                                                                                                                                                                                                                                                                                                                                                                                                                                                                                                                                                                                                                                                                                                                                                                                                                                                                                                                                                                                                                                                                                                                                                                                                                                                                                        |
|--|----------------------------------------------------------------------------------------------------------------------------------------------------------------------------------------------------------------------------------------------------------------------------------------------------------------------------------------------------------------------------------------------------------------------------------------------------------------------------------------------------------------------------------------------------------------------------------------------------------------------------------------------------------------------------------------------------------------------------------------------------------------------------------------------------------------------------------------------------------------------------------------------------------------------------------------------------------------------------------------------------------------------------------------------------------------------------------------------------------------------------------------------------------------------------------------------------------------------------------------------------------------------------------------------------------------------------------------------------------------------------------------------------------------------------------------------------------------------------------------------------------------------------------------------------------------------------------------------------------------------------------------------------------------------------------------------------------------------------------------------------------------------------------------------------------------------------------------------------------------------------------------------------------------------------------------------------------------------------------------------------------------------------------------------------------------------------------------------------------------------------------------------------------------------------------------------------------------------------------------------------------------------------------------------------------------------------------------------------------------------------------------------------------------------------------------|
|  | GAAATCAATTAAC TGTGAGTTTGAAATGAATGGCGCAGTGTATCCCTTTGATTGTATTAGACA<br>ATAATCTTTACCACAAAAAACCTCAGCATGCTTTTAGACAAACCTCAATCAATACAAAATG<br>ACCATAAAATAATGGACCACTAAAACCAATACAAATAATTTGCTGTCATCAAAGGTTTACAGT<br>CTCTCAATTATTGCCTCTTATTGCAGGTGGACATGTGAACCCAGCTGTTTCTCTGGCTATGGTT<br>GTCGTGGGGAAACTCCCAATAAAGAAATTTCTGTCTATGTGGCAGCTCAATTTCTTGGTGCC<br>TTTGCCGGGTCTTGTGCTGTGTATGGTCTGTACTATGGTAAGTTTTCAGTGCAC TTGTTATTGC<br>TTCTTTGACTCCTCTTCTATGGCAGTCTGCTACTTACATACATCCATATATTAGACACACACAA<br>CTCAAAC TAAATGGTCTGGCTTGTTTTGACCTTTGATAGATTTAGATTAGACATTAGACATAA<br>GATTTAACATTTGAGAGTAGGCTACACTTACTCTGAATAGTCGTCAAATTACTTCCTATTAATT<br>AATTTCTAAAATATTATAGTTGGAAAGCTGTTAGATGTTGAAATCTATCCTTTGCCGCAACTCA<br>TTTGCATTTTTCAGCATAAAATACCTTTAAAAAAAATCATCTTGTCCATAGGTGCCTTTGCCA<br>ATTTCTCTGATGGACATCTGAGTGTTACTGGTCACAATGCTACAGCTGGAATCTTTGCTTCAT<br>ATCCACGTGAAGATCTCTCATTGTTAAATGGATTTGTTGATCAGGTGAGTGTAACACAGCAAT<br>TCATTATTCAAATATCAAATGATCTCACTGGTTATTATACAGTCAAATGGTGTTAAAGCTTTT<br>GGTTTGAATTATTTGAGTTAAAGGGATGGTTCGGAATAAAATCAACCAAGGGTCCTTTGCAC<br>CGTGACCTCGAGCCAAACACCCCCCAGAAGCCTTTTTTCACTTG GTTGAACATTATTAAG<br>TTAGAGCTTATTTGAGATATCAGCCGAATGGCTTAGTGCAGGCGCTAATGGATCCAAGGTTG<br>TATCTCGTAAATTACCCCACTAATAATGCCCAGAATGGTACCAAACTTCTACGGTAGTACAAA<br>TAGGTTATGTACTCATAAAATGAGGCATTGGAAAGTTTGTAAGTACATCAGGAGTTTATTTAA<br>ATAACACTTGCCTGATAGCTCATGTTACCGCTAACCCGGACATCGAGGTCACTTCCGTGATTT<br>GGGAAAAGCACGTAAAAGTCCTGTGAGAAAGCGATGCATAAGGATGTAGTGTAACGCCGCC<br>CAGTTCCAGGAATGCACTAATATTTTGTGTTGGTAGTACCAGTTTGCAACAATTATTAGTCAACA<br>CTAAGTTGTCAACACTTCGGAAAAAATTATAATTAGTCGTTACACTACATCCTTATGCATCGCT<br>TTCTGCCAGGACTTTTACAGGCTTTTCCCAAATAACGGAAGTGACCTCGACATCCGGGTTGG<br>CGGTACTTGCATTCTGGCTCGAGGTCATAGTGCTAAGGACCCTAGGTTGATTTTATGCCGAAC<br>AATCCCTTTAAAAGGAAAGAACAGTAAATATAAATCATAAGCATAGCTGGTGGAGAATGTTTT<br>ACCAAGAACTAATAAAAAAAAAAAAACTAAATGAAATATACTTTAACTTTATAACTCACAA<br>TGTGAAC TTATTTCTATTTTTTTATTTATCTCACAATTACTTTTTTCTTTGAGATAAAACAGG<br>CAAGAATTTTTTGCTAATCATTAGTCTCTGTTTACACAGGTGATTGGCACAGCTGCCCTGGTC<br>CTCTGTATTTTAGCCATAATAGATAAGAAGAATATCGGGGCACCTAAAGGGATGGAGCCTCTG<br>GTTATTGGTCTGAGCATCCTGGCTATCGGAGTGTCCATGGCGCTGAACTGCGGCTATCCGATC<br>AACCTTGCCAGGGACTTGGGACCACGGCTTTTCACTGCTATAGCAGGATGGGGCTTAGACGT<br>GTTCAGGTACAGAAAACCTTTGCTGCATCAACATACTCTTTTTGTTATTGTTTGGTTGGATTTT<br>CCACTTCTTCCCTTATATGTATTATTAATAATACATATAATAGGGAAATTTGTATATGGCTGTGTA<br>CTAAACACAATACACTTAGAAGTGTTACCTTGTGACACAAGATTCAGCATGTGAGAAACAG |
|--|----------------------------------------------------------------------------------------------------------------------------------------------------------------------------------------------------------------------------------------------------------------------------------------------------------------------------------------------------------------------------------------------------------------------------------------------------------------------------------------------------------------------------------------------------------------------------------------------------------------------------------------------------------------------------------------------------------------------------------------------------------------------------------------------------------------------------------------------------------------------------------------------------------------------------------------------------------------------------------------------------------------------------------------------------------------------------------------------------------------------------------------------------------------------------------------------------------------------------------------------------------------------------------------------------------------------------------------------------------------------------------------------------------------------------------------------------------------------------------------------------------------------------------------------------------------------------------------------------------------------------------------------------------------------------------------------------------------------------------------------------------------------------------------------------------------------------------------------------------------------------------------------------------------------------------------------------------------------------------------------------------------------------------------------------------------------------------------------------------------------------------------------------------------------------------------------------------------------------------------------------------------------------------------------------------------------------------------------------------------------------------------------------------------------------------------|

AGGCACACCTCCCAACCAAGGTACCTTTAGAAACTCCAAATAGACTTTAAGTGCAAAGGCCTA  
TCACCATTCTTCTGACAGAGCAAATGAATTTTTTAATGCACTTGTGTATCTCCTGCATATTGAA  
GCAATTTAAAAAATGTACGTGAGGCAGTCTCCTTACATAAATATTCAGAGTGGCACAACCAA  
AGACAGGACGTATTTTATTCCTCTAACTTTTCCTATTAAAGGGAAAAAAACATTATCGTCTTTC  
ACTATAACTCTGCTTTTAGCAATCATAGTTATGTAGGTCATTGTCACAGAGAGAGAGAGAGT  
TCTGGTGCTGCTCTTCAACAGCAAAAAGAGTCTGATTTTATGCACAGGATTGAGTAAAGAAT  
GATGAAATGTATAAAATAATTGTCTAACATATGCAATAGAGGTGGATAAACAGAAAAGTCTG  
TGTTTACAATCACAAATTTTCAAGAGTGAAGAGTCTCCAGAACACTATAGCCCTTAACTCATT  
ATGCAAATCTCTTGAAATGTACTGATTAGTCTGATTGGTCATTTAGCTGTCAAATATTTCTGTA  
TATTTTGTTATTCAGCCCTTCACTACTACAAACACACAGGGTGACGTCCACGGAGAGCTAAT  
CACATATCAGTTGACTACGTGAGGAAGTGCTTGATCTGTCTGCTTAATTTGTCTTCCCACTCA  
AAGACAGATTATGGGTCACCTGAGTGCAAATGGCTCTGGTGTGTACATTTTAAACACTATAT  
TGTACATGAGCGTTGCATAAATTCAGTTCAGCAAAGTGTCTTTATGCAGTAGCTATGCATTTG  
TTTACAGTTACCTTCGCCAACTTGTTTGTAGAGCAGGTTGAAGGACACAGAGCATTGTGTTT  
CTCAGTAGCCTATAAAAGGATCAAGGGATTGAGGGAGGGAAAGAGTGCTGCAGACAGGGA  
GCACTGGAGTGACACACTAAGCACAGATTACTACGAATGCATTAGTGTCTGTGCAGCAAGAC  
TAGACACCAAAACAGTGTGACATCATCCTTCAGTCTGACCACAGAACAACACTTCAGATAC  
ACCAGTAATGTACAGGCACATTCCCTAATCAAGTCTACTTTAACCTTAATTACAATTGTAATTTA  
CAACTGGTGTAGAATTCAAAGAAATGCATACGTCCCAAATCATGTTTTATCCCATTAATATTTT  
AAACATTAGAAGATATGAATCACCAATATGCAAAATGACACCTATATAAATTTGCATTTAATTT  
ATATACAGTGGCCACAAAAAGTATTTGGACAATTTTGTGCAATATTTGGTTACTTAAATCATT  
TATGTCTGAATGTTATATCATTAAATGCAAAATATCAAACCATGTGTGTGTTTCAGAGCTGGAA  
ATGGCTGGTGGTGGGTTCAGTGGCCGGGGCCCATGGTGGGAGGTGTGGTTGGGGCAGGGAT  
CTACTTCCTAATGATTGAGCTGCACCATCCTGAACCTGCGAAGAACCTTGAAGATGACAACA  
GCGTCAAAGACAAATATGAATTAAACACCGTCAACTGAACAGAGAGGGAAAGTATGGTATC  
TTTTCTTCCACCATAGACATCAAGCAAGAACTCTCTTTCTTCTCTGTCTTTTCCTCAAGATC  
TCTTTTCTGAGTCTTTTGCCAAAGTACACTCATTAAACCAAGCAGCTATGAAAGACAGCAAG  
TGTTAATTATGCATAATTCTAGTTACTTTTCATGGTTTTACAGAAAGTAGAACTATAGAGAATGT  
TCAAAGAGCACCATCAACAATCAGGTATTTTGTGGAAAGCATCCGCAGTATCTTCACCATCA  
ACAAGTGTACACCACTGCCAGTAAAAGATTGCAGGTGCTTTGCATTTAGAGATAATCATGA  
TTTCCAACCTGGTTTCTCAGCAGCTTGTTACAGACTCAGCGAGAGAGTGAAGTACTCAAGGAT  
TGTTGTATCCATAATGTCTTTTCACTTTTGTCCAATCCTACAACACTACAGTATATGTCTTCTTCT  
TAACTTTACAGAGATCTGACAACCTTATAACAGCAGATACATGTTTTTCTCTCACTAAAACG  
AAGGAAGAGGGTACTTTACTGTCCACTCTGTTTACTCAAAGATGAAAAGTCCGGACGAATCA  
GTACGACATATTAACCTAAGTGCATGCATAACTGCTGATAAGGTAACATGCATGGGGTAACGGG

|                          |                                                                                                                                                                                                                                                                                                                                                                                                                                                                                                                                                                                                                                                                                                                                                                                                                                                                                                                                                                                                                                                                                                                                                                                                                                                                                                                                                                                                                                                                                                                                                                                                                                                                                                                                                                                                                                                                                                                                                                                                         |
|--------------------------|---------------------------------------------------------------------------------------------------------------------------------------------------------------------------------------------------------------------------------------------------------------------------------------------------------------------------------------------------------------------------------------------------------------------------------------------------------------------------------------------------------------------------------------------------------------------------------------------------------------------------------------------------------------------------------------------------------------------------------------------------------------------------------------------------------------------------------------------------------------------------------------------------------------------------------------------------------------------------------------------------------------------------------------------------------------------------------------------------------------------------------------------------------------------------------------------------------------------------------------------------------------------------------------------------------------------------------------------------------------------------------------------------------------------------------------------------------------------------------------------------------------------------------------------------------------------------------------------------------------------------------------------------------------------------------------------------------------------------------------------------------------------------------------------------------------------------------------------------------------------------------------------------------------------------------------------------------------------------------------------------------|
|                          | <p>ATAAATGTTGCAATGCATGCTAAAAAACAAGCGATGAACTATTAATATAAGCTTAAGAAGA<br/> AATAAATGTGTATTTATGCTACAGTGTGTTAAATGTAGAAGAAAATCATTTTTAGAAAGAAAGG<br/> AGCAGTATTGTGTATAATACCACATTCAGACATGTTACATTTTCAGGCATAACAAAGCTTAAT<br/> GTGATATTTTGAATGCATCAGTCGAAGCATTAGTAGGTGTTTTGTAGCTATTGTTAATGGGAA<br/> AAAATATGTTTAAATATGTTTTTTTTCTTTTTAAAAATTAAGTATAGTAATTTATTTCTTGGCACTT<br/> GAATTAATAGCAGTTGTTTGTACAATTCAAAGACATCATATTATTTTTTTTGTCTTTTATTGTG<br/> TTATTTCAATTTTCAGTTTCAGATTATTATTTTTTTTACTTTTTACTCTCTCGTAAATGAAAAATTT<br/> GGAGAATATTTACCACAATGAAAATGTTAAAGACATGTACTGTCATTCTGCTAATGTAGACCT<br/> GACATAAAATAAACATACTGTTATATATAACTCATGTCTGTTTTCTGTGAATAAGGATTTAGA<br/> CTACAG</p> <p>ATGGAGCTCGAAAACATGAGAAAATTGAGGGGCAAATGCATGTTGAGGCGGGACATCATAA<br/> GAGAGTTTCTGGCAGAATTACTGGGGACATTCGTATTAATACTGTTTCGGTTGTGGTTCAGTGG<br/> CCCAAAAAGTCCTGAGCAGAGGGCGCGCTTGGAGAAGATCTCACCATCCACTTTGGCTTTACT<br/> CTAGGGGTGATGCTGGCTGTGTACATGGCAGGAGGCGTTTCAGGTGGACATGTGAACCCAG<br/> CTGTTTCTCTGGCTATGGTTGTCGTGGGGAAACTCCCAATAAAGAAATTTCTGTCTATGTGG<br/> CAGCTCAATTTCTTGGTGCCTTTGCCGGGTCTTGTGCTGTGTATGGTCTGTACTATGGTGCCTT<br/> TGCCAATTTCTCTGATGGACATCTGAGTGTTACTGGTCACAATGCTACAGCTGGAATCTTTGC<br/> TTCATATCCACGTGAAGATCTCTCATTGTTAAATGGATTTGTTGATCAGGTGATTGGCACAGCT<br/> GCCCTGGTCCTCTGTATTTTAGCCATAATAGATAAGAAGAATATCGGGGCACCTAAAGGGATG<br/> GAGCCTCTGGTTATTGGTCTGAGCATCCTGGCTATCGGAGTGTCCATGGCGCTGAACTGCGG<br/> CTATCCGATCAACCCTGCCAGGGACTTGGGACCACGGCTTTTCACTGCTATAGCAGGATGGG<br/> GCTTAGACGTGTTTCAGAGCTGGAAATGGCTGGTGGTGGGTTCCAGTGGCCGGGCCCCATGGT<br/> GGGAGGTGTGGTTGGGGCAGGGATCTACTTCCTAATGATTGAGCTGCACCATCCTGAACCTG<br/> CGAAGAACCTTGAAGATGACAACAGCGTCAAAGACAAATATGAATTAACACCGTCAACTG<br/> A</p> <p>MELENMRKLRGKCMLRRDIREFLAELLGTFVLILFGCGSVAQKVLSRGALGEDLTIHFGFTLG<br/> MLAVYMAGGVSGGHVNPAVSLAMVVVGKLPKFPVYVAAQFLGAFAGSCAVYGLYYGAFAN<br/> FSDGHLSVTGHNATAGIFASYPREDLSLLNGFVDQVIGTAALVLCILAIIDKKNIGAPKGMEPLVI<br/> GLSILAIGVSMALNCGYPINPARDLGPRFLTIAAGWGLDVFRAGNGWWWVPVAGPMVGGVVG<br/> AGIYFLMIELHHPEPAKNLEDDNSVKDKYELNTVN</p> |
| Lw_Aqp10aa<br>(OQ301576) | <p>CTAATAGACACAGACTGAGGTCAGAGATCTCTGAATAGCAGGGCAACAGCAAGTTTTGCAC<br/> AAAACCTGCACTAAATACTTAAATGAGTCTGGTAAAAAAGATAGTTAAGAGGATGAAGGTG<br/> AAAAATGAACTAGCACGACAAGTTATGGGAGAGATCTTAGGCACTTTTGTACTTCTGGTAAG<br/> TTTTTGCATTTTTTTCACTATTAACAAACTGAGCATAGTTATTGATTTATAGATATTGTTTGT<br/> AGCACATGTTTTTCATTAATGAAATACAAGATGTTTTCAATTGTGTAACCTAAAACTCATTATC</p>                                                                                                                                                                                                                                                                                                                                                                                                                                                                                                                                                                                                                                                                                                                                                                                                                                                                                                                                                                                                                                                                                                                                                                                                                                                                                                                                                                                                                                                                                                                                                                                                                                                  |

|  |                                                                                                                                                                                                                                                                                                                                                                                                                                                                                                                                                                                                                                                                                                                                                                                                                                                                                                                                                                                                                                                                                                                                                                                                                                                                                                                                                                                                                                                                                                                                                                                                                                                                                                                                                                                                                                                                                                                                                                                                                                                                                                                                                                                                                                                                                                                                                                                                                                                        |
|--|--------------------------------------------------------------------------------------------------------------------------------------------------------------------------------------------------------------------------------------------------------------------------------------------------------------------------------------------------------------------------------------------------------------------------------------------------------------------------------------------------------------------------------------------------------------------------------------------------------------------------------------------------------------------------------------------------------------------------------------------------------------------------------------------------------------------------------------------------------------------------------------------------------------------------------------------------------------------------------------------------------------------------------------------------------------------------------------------------------------------------------------------------------------------------------------------------------------------------------------------------------------------------------------------------------------------------------------------------------------------------------------------------------------------------------------------------------------------------------------------------------------------------------------------------------------------------------------------------------------------------------------------------------------------------------------------------------------------------------------------------------------------------------------------------------------------------------------------------------------------------------------------------------------------------------------------------------------------------------------------------------------------------------------------------------------------------------------------------------------------------------------------------------------------------------------------------------------------------------------------------------------------------------------------------------------------------------------------------------------------------------------------------------------------------------------------------------|
|  | ACTATTA AAAATATTTATTTTTTCAATATGGTAAAATTTGTTAATGCATTAAAAATCATTAGATAA<br>CGAATAACATTTACAGCATTTATTAGTCGAGGTTAATGTTAATTTATAAAAAATACTATAGTTCA<br>TTGTTAATTCATGTTTGTGCACATTGTTAACTAATGTTAATTTATAAAAATGTAATGATGTAATAC<br>TTTGTA AAAATAAAAATAACATGAACCTAATAAATGCTGCAAAAAGAAATACTGCTCAATAATAAT<br>GCATGCATTAACTAATGTTAACAAAGTGTTATGAAAATACCACATAAACACATTTAGTTTACAT<br>ACATTTTGTCAACATTTTCCTTGATTCTCTGTTAATATTAACATAAAAATGTAATAATTTAATTAAG<br>AATTCATAAAGTGATATTTACATGAATAAGAAAATGTGCAATGTGCTTTTTTGAAGGGCTTATG<br>TTGAAAATGATTGTGCTATCATATATGTTACACAAAGGCATAAGCCTTACAATGGACAAATCAT<br>GCAAGGTTCTGTGAGCATGTGCTTTTGTCTATATATGCTGAGAATGTATTTATTTAGCAATGTG<br>TGCAAGTTAGCAGAACTTTTAATCTCAAGTAATGTGCAGTCCATAATAAAATATTCCAGTGA<br>AGGCTCAATTTAAGAGTACTATCAGGGTTAGTACTACTAGCAATAATGTTACAACATTACTTAT<br>TACTATGGCTGCAATTCAGCCGGTAATCAAGCTTATGCATGCCGACAATCAGAACAACAGCAT<br>GATTGTGACTGAGGGTGATACATTTTGTTTAAAACCTTGATGAACAAAAAGTTAATATGACGT<br>AACTTGTGTTTATGACACAATTTGGCCAGTTAGTAGTGGGGTGGGGGTTCCACCAACAAAA<br>ATGCTTTCAAAAAGCCAAAACATCAGGCTTTGCATGTACTGTAAGTTAACTGGAGCATAA<br>AAACATCCCTGTGCTTTTATGCTAAATAGCAATGCTATCATACAATCATGACCTTAACAACCTGT<br>AACTGTTTTATACCCAACTAAAACAAGCACTAAAATTATTATGTAATTCGTTTTTCTCTGCTG<br>TAGCTGTTTGGTTGTGCTGCAGCAGCTCAGGTGAAAACCAGCAGAGAACTAAGGGACAGT<br>TTCTGTCTGTTAACATGGCCTTCTCTGTTGGCGTCATGTCTGCCATGTACCTCTGCAGGGCGG<br>TATCAGGTAAAATGGTTATAGATTGGGCTGTTTTGTGGCAGTTAAGGAGAAATCCTTTGTAAT<br>ATTACCCTTTTTTGGATCGACACAACTGACTTCTGTTTTAATATATATATATATCCCTCTCTCT<br>CTATTCCTCCTGAAGGAGCTCATCTAAACCCAGCTGTGTCTCTGAGTTTCTGTGTGTTGGGAG<br>ACCTAGCCTGGATAAAGCTGCTACCCTATTCTCTTGGTCAAATATTGGGGGCTTACCTGGCCT<br>CTGGACTTGTCTATCTCATCTACCATGGTAATAAGAAAGAGAGAAATAAAGACATCCTTTCTT<br>TAAAGATACACCCTAATCTTAACAGTAATTCACCATTTCTATTTTTTCAGTTTTGTGTTTTTGAA<br>AAAGAGAGGATAAAGATTATTTCTCAACCTCCTCTCCTCCAGATGCCATCATGGAGTTCAGT<br>GGTGGAATTCTGACTGTATTTGGTCCTAATGAAACTGCCAGTATCTTTGCAACTTACCCAACT<br>GATGTGGTATCAGTGCAGACCAACTTCCTCGATCAGGTCGGCAAAAGGTCATATCAGATTAG<br>ACAAGAGCGCTGTAGTTAACTACTACTGATATAATAAATAATTGTAGTTGAATCTAATCTGATA<br>TAATATGCAATGCTCTAATGCAATAAAATGTTATATAACATAAAAAACAATTTTCAAACATTAA<br>TCAATTATCAATAGATCTTGTGACGATTCTGGGTCTTCTGACTAGACCATAATCTTTCTCTTGT<br>TTGCCTGTGTGTAGGTGGTTGGCACAGCCATGCTGATGTTGTGCATTCTACCTCTGAATGATA<br>AGAGAAATGCTCCAGCTCCTGAAGCGTTGCTTCCACCCATTGTAGCAACTGTTGTACTTGGG<br>ATTTCCATGTCAATGTCGGCTAACTGTGGAGCTGCCATAAACCCCTGCCCCGTGACCTTGGTCCA<br>CGACTGTTACGTTACAGCAGGCTGGGGCACAGAAGTCTTTACGTGCGTACTTTATTAACC |
|--|--------------------------------------------------------------------------------------------------------------------------------------------------------------------------------------------------------------------------------------------------------------------------------------------------------------------------------------------------------------------------------------------------------------------------------------------------------------------------------------------------------------------------------------------------------------------------------------------------------------------------------------------------------------------------------------------------------------------------------------------------------------------------------------------------------------------------------------------------------------------------------------------------------------------------------------------------------------------------------------------------------------------------------------------------------------------------------------------------------------------------------------------------------------------------------------------------------------------------------------------------------------------------------------------------------------------------------------------------------------------------------------------------------------------------------------------------------------------------------------------------------------------------------------------------------------------------------------------------------------------------------------------------------------------------------------------------------------------------------------------------------------------------------------------------------------------------------------------------------------------------------------------------------------------------------------------------------------------------------------------------------------------------------------------------------------------------------------------------------------------------------------------------------------------------------------------------------------------------------------------------------------------------------------------------------------------------------------------------------------------------------------------------------------------------------------------------------|

|  |                                                                                                                                                                                                                                                                                                                                                                                                                                                                                                                                                                                                                                                                                                                                                                                                                                                                                                                                                                                                                                                          |
|--|----------------------------------------------------------------------------------------------------------------------------------------------------------------------------------------------------------------------------------------------------------------------------------------------------------------------------------------------------------------------------------------------------------------------------------------------------------------------------------------------------------------------------------------------------------------------------------------------------------------------------------------------------------------------------------------------------------------------------------------------------------------------------------------------------------------------------------------------------------------------------------------------------------------------------------------------------------------------------------------------------------------------------------------------------------|
|  | <p>TATTAACAAACAGTCTAGATTAATGTAAAGATCTATTAACATCAGATTAAGTGTTTGGTTATCT<br/> ATGTCCTTGCACCTCCTACCTTTTAACTTATCTCTCCTCTGATAAAGCAAATTACCAGGTATTT<br/> CACTTGCTTAACTCCAGTGTTCTATTAATAATTATCTCAGCACATTGCCCTGAAGTGTTCTTC<br/> ACTTCTCCATACATGGTCATTTCTAAGCCCTCTTTTTTCTGACCCTCACAGGTGCTATGACTA<br/> CTTCTTCTGGATTCCATTAGTGGCTCCTTTGGTGGGGGGCGTGCTGGGGTCCATTATTTATCTG<br/> GTCTTCATTCAGTGGCATCTGCCTGAGCCCGAGGAAGAATCTGAGTCTGAGGAGATCAAGG<br/> AGCAAACAAAGGACATGGAGCACAAACAGCAAAAAAGACGAGTTATACCTTAAAATGTCTTC<br/> TATTTAAAAGCCTGCGGGACCATTGAATCTGCCTCACAGCATTTCCAGAACATGCTTCCCATC<br/> TTTTCCCTATTATTTCTGGACTGTTTTATACTGTAAATAAAAAATGGGGAAATGCCACAACATA<br/> AAACTGGGGGAAAATGTAAACCCCTTTCCCTAAAATATTAACTGTGACTTCTTTCAACTA<br/> TATGTAGAAAATTACTATCGCCTTGATCGTTCACTGTTTCATACAGTAGATGGGAATTAATA<br/> TTTGTATATAGTATGTACAGTGTATTAGTTATTTTAGATTATCCTCTTGTTGGAAGATGGTGAA<br/> TCTAGATATATTGTTTGTGTCTAGTGCTCTCATGTAAGTGACTCAATATGCTGTACGTAAAT<br/> GTTGTGTCTATTACATCACATACATTAGGATGAGTGTGTGCATATTTGCTGATGTCATGTGGTG<br/> TACATTAACAAGTTCACAACCAAAAAGTACAACAAATAAATGGGT</p> |
|  | <p>ATGAGTCTGGTAAAAAAGATAGTTAAGAGGATGAAGGTGAAAAATGAACTAGCACGACAAG<br/> TTATGGGAGAGATCTTAGGCACTTTTGTACTTCTGCTGTTTGGTTGTGCTGCAGCAGCTCAGG<br/> TGAAAACCAGCAGAGAACTAAGGGACAGTTTCTGTCTGTAAACATGGCCTTCTCTGTTGGC<br/> GTCATGTCTGCCATGTACCTCTGCAGGGCGGTATCAGGAGCTCATCTAAACCCAGCTGTGTCT<br/> CTGAGTTTCTGTGTGTGGGAGACCTAGCCTGGATAAAGCTGCTACCCTATTCTCTTGGTCAA<br/> ATATTGGGGGCTTACCTGGCCTCTGGACTTGTCTATCTCATCTACCATGATGCCATCATGGAGT<br/> TCAGTGGTGGAATTCTGACTGTATTTGGTCCTAATGAACTGCCAGTATCTTTGCAACTTACC<br/> CAACTGATGTGGTATCAGTGCAGACCAACTTCCTCGATCAGGTGGTTGGCACAGCCATGCTG<br/> ATGTTGTGCATTCTACCTCTGAATGATAAGAGAAATGCTCCAGCTCCTGAAGCGTTGCTTCCA<br/> CCCATTGTAGCAACTGTTGTACTTGGGATTTCCATGTCAATGTCGGCTAACTGTGGAGCTGCC<br/> ATAAACCTGCCCCGTGACCTTGGTCCACGACTGTTACGTTACAGCAGGCTGGGGCACAG<br/> AAGTCTTTACGTGCTATGACTACTTCTTCTGGATTCCATTAGTGGCTCCTTTGGTGGGGGGCG<br/> TGCTGGGGTCCATTATTTATCTGGTCTTCATTAGTGGCATCTGCCTGAGCCCGAGGAAGAAT<br/> CTGAGTCTGAGGAGATCAAGGAGCAACAAAGGACATGGAGCACAAACAGCAAAAAAGACG<br/> AGTTATACCTTAAAATGTCTTCTATTTAA</p>                             |
|  | <p>MSLVKKIVKRMKVKNELARQVMGEILGTFVLLLFGCAAAAQVKTSRETKGQFLSVNMAFSVG<br/> VMSAMYLCRAVSGAHLNPAVSLSFCVLGDLAWIKLLPYSLGQILGAYLASGLVYLIYHDAIMEF<br/> SGGILTVFGPNETASIFATYPTDVVSQTNFLDQVVGTAAMLMLCILPLNDKRNAPAPEALLPPIVA<br/> TVVLGISMSMSANCGAAINPARDLGPRLFTFTAGWGTEVFTCYDYFFWIPLVAPLVGGVLGSIY<br/> LVFIQWHLPEPEEESESEEIKEQTKDMEHNSKKDELULKMSI</p>                                                                                                                                                                                                                                                                                                                                                                                                                                                                                                                                                                                                                                                                                                                |

|                          |                                                                                                                                                                                                                                                                                                                                                                                                                                                                                                                                                                                                                                                                                                                                                                                                                                                                                                                                                                                                                                                                                                                                                                                                                                                                                                                                                                                                                                                                                                                                                                                                                                                                                                                                                                                                                                                                                                                                                                                                                                                                                                                                                                                                                                                                                                                                                                                                                                                                 |
|--------------------------|-----------------------------------------------------------------------------------------------------------------------------------------------------------------------------------------------------------------------------------------------------------------------------------------------------------------------------------------------------------------------------------------------------------------------------------------------------------------------------------------------------------------------------------------------------------------------------------------------------------------------------------------------------------------------------------------------------------------------------------------------------------------------------------------------------------------------------------------------------------------------------------------------------------------------------------------------------------------------------------------------------------------------------------------------------------------------------------------------------------------------------------------------------------------------------------------------------------------------------------------------------------------------------------------------------------------------------------------------------------------------------------------------------------------------------------------------------------------------------------------------------------------------------------------------------------------------------------------------------------------------------------------------------------------------------------------------------------------------------------------------------------------------------------------------------------------------------------------------------------------------------------------------------------------------------------------------------------------------------------------------------------------------------------------------------------------------------------------------------------------------------------------------------------------------------------------------------------------------------------------------------------------------------------------------------------------------------------------------------------------------------------------------------------------------------------------------------------------|
| Lw_Aqp10bb<br>(OQ301577) | CTTCTCCTGACGCGCACATAAAACACACTAACCACAACAGATAGTCTGAGTTTACCTATGTG<br>GTGTGATAATTATCCAAACAGAAGACCATGCGTTCTCTAAGGCGCTGACTGGGACCTTCTCA<br>ATGGAGCCCTGAGAATCATCTGTCTGGAATCCTCAATCTCTCGGCCTGCATTTACTCTTCTTG<br>TAAGCGAACAGAAAAAAACAGAAAGTACAGAGGGCAACATAATGGATCGTCTGCTGAGGA<br>GATGCCGAATCAAGAGCAGCTTGGTCAGAGAATGTCTGGCTGAATTTTTCGGAGTCTATGTT<br>TTGATAGTAAGTCTGTAATCTTCTGTATTTTTAATATGGAAATATGTGCCATTAACCCTGTAAAA<br>AAAAAAAAAAAAAAAAAGATTATTGGAGTACATTTTACAAGAAAATACTATTTTCAGTCATTAA<br>AATTTTCATGTTTAATCAATGTGTTACTTGCCATTAAAAAAATGGTGCAGAAATGAAGAGATTG<br>CTAGTAAATTTTCACAAATAATTACAGTGAACCTGTATCTTTTCTAAAAATGTGATTTTCTTTGG<br>TAATACTTTACAATAAGGTTCCATTAACTAACATTCAGTACAATGACAATAACATTTGCTACA<br>TTATTTATTAATCTCTGTAGTTCCTTTAATTGCTTTGGTGCAATTTTCACAATCAACTAGTACA<br>TTTTCAAACTCCTAGTGCTAGTATCACAAACAGTTCATCAAAAGTGCAATTTTTTCAATTTTTT<br>TTGCATATTTTCATTTGTGTTAGTACAATCCACAAAATCACAAGTATCCTTTTCTCACAAAAT<br>AATTTTCATATAAATGTTTCATTCACAGTAACTGCATTTTCATGAAGCTTTTACTATCAAACTTTT<br>GATTTGCATCTCTTCTCGTTCAGTTTAAATACATTTGTCTATTATTGAATCCAGTAATGGTTCAAT<br>GAATCATTTGGTAAACCTATAGATATCTGCAATTTCCAATATAGGTAACCAAATGTAATTAAAT<br>GTTTTTACATAAGCAATTTATCTTAGATGATAACACTGTGTTCAAAGTGTGTGCACGCAAACA<br>TTATGGATTCAATAATAACATAATGTAATTACATAATGTTATAATGTAAGTGTATTTTCTAATCTG<br>TAGCCGTTACTGTAATTAATTCAGCAATAAGGGCTTGCATTGTTTGTGTGCTGAATGGACTGATT<br>GTTGAAAGTACTAAATTGAAGGATCATACTGTTATGTTTCGGTGATTAAACCAAACGTTCTCA<br>TTATATATTTGTGTTTTGAAACAATAATTATGTAGAATGAAAATAAGTGAAACTAGAATAAAAT<br>CATGAGATCAGGTTTTGAAAGATTGACTGTTACAAGTGTGATCAGTTTGGAGTTTTGTACTAA<br>GCGTTTTTACATCTTGTGAAAATAGTACCAAATCGATTATCGAATAAAAAAAAAAAAAATGTAAC<br>ATGAACTAACAAATTAATAGTTGTATTTTTGTTCACTAATGTTAGCTCAGACCCAGACAGTAAC<br>ATGTGTGCGGCTCAGATCCGGCCCCACATCGGGCCGTGTGGCCGGGCGACACATGTTACTGTC<br>TGGTCCATTAAATAATATTAATATTTATAATACTAATAAAAGGAATTTAAAGTGTTATGTAAATG<br>GTAAAGCACTTGTA AAAATCTATAAAAAATATTTTATCTTCATAATATCCTATTATCTACTGAAA<br>TGCACTGCCGTGTGTACATTACATCTCTTCAGTAGCACATGTGCAAAGAACAATATTCTAGAA<br>GTCAAACTTTGAAGACTTTGAATAATCTTTTGCCTCTTCTCAGGAAGTGCAGTCTCCATAATG<br>CCCAACAATCTCATTGTGCCATAAAGCTTTAAATTATAGACATCATGTCTGAGTACACGTTCA<br>CACCAGATAAAAAAATGTCTTGATGTTACTGTCTCTACACTCCAGCTTTTTGGGTGTGGCTCA<br>GTTGCCCAGGTGACGACCTCTCAAAACACTAAGGGCGACTACCTGTCAATCAACCTCGGATT<br>TGCACTGGGCACCACATTTGGAATCTACATTGCAAAAGGGGTATCAGGTATAAACTCTCCAG<br>CACAGCTGTGTATATTAATTATGTCCTTGTA AAAATAAAATATTTCTCATCTGTTTAAAGGAGCTC<br>ACCTGAATCCAGCTGTTTCCCTCAGCCTGTGTGTCCTGGGCAGATTCTCCTGGACTCGTTTTTC |
|--------------------------|-----------------------------------------------------------------------------------------------------------------------------------------------------------------------------------------------------------------------------------------------------------------------------------------------------------------------------------------------------------------------------------------------------------------------------------------------------------------------------------------------------------------------------------------------------------------------------------------------------------------------------------------------------------------------------------------------------------------------------------------------------------------------------------------------------------------------------------------------------------------------------------------------------------------------------------------------------------------------------------------------------------------------------------------------------------------------------------------------------------------------------------------------------------------------------------------------------------------------------------------------------------------------------------------------------------------------------------------------------------------------------------------------------------------------------------------------------------------------------------------------------------------------------------------------------------------------------------------------------------------------------------------------------------------------------------------------------------------------------------------------------------------------------------------------------------------------------------------------------------------------------------------------------------------------------------------------------------------------------------------------------------------------------------------------------------------------------------------------------------------------------------------------------------------------------------------------------------------------------------------------------------------------------------------------------------------------------------------------------------------------------------------------------------------------------------------------------------------|

|  |                                                                                                                                                                                                                                                                                                                                                                                                                                                                                                                                                                                                                                                                                                                                                                                                                                                                                                                                                                                                                                                                                                                                                                                                                                                                                                                                                                                                                                                                                                                                                                                                                                                                                                                                                                                                                                                                                                                                                                                                                                                                                                                                                                                                                                                                                                                                                                                                                                        |
|--|----------------------------------------------------------------------------------------------------------------------------------------------------------------------------------------------------------------------------------------------------------------------------------------------------------------------------------------------------------------------------------------------------------------------------------------------------------------------------------------------------------------------------------------------------------------------------------------------------------------------------------------------------------------------------------------------------------------------------------------------------------------------------------------------------------------------------------------------------------------------------------------------------------------------------------------------------------------------------------------------------------------------------------------------------------------------------------------------------------------------------------------------------------------------------------------------------------------------------------------------------------------------------------------------------------------------------------------------------------------------------------------------------------------------------------------------------------------------------------------------------------------------------------------------------------------------------------------------------------------------------------------------------------------------------------------------------------------------------------------------------------------------------------------------------------------------------------------------------------------------------------------------------------------------------------------------------------------------------------------------------------------------------------------------------------------------------------------------------------------------------------------------------------------------------------------------------------------------------------------------------------------------------------------------------------------------------------------------------------------------------------------------------------------------------------------|
|  | CTTTCTATGTGTGGTCACAGCTTTTAGGAGCATTTCTGGCTGCAGCAACTGTTGCTCTTCAGT<br>ATTATGGTGAGTGCATGTTGGCCTATATGTCATCTCTATATAAAAAATACTGTACAGTAAGTACAT<br>CCAAATTAAGGCACCTAATCATACAGTATGTATTTTGTTTAGATGCCATAATGGATTTCACTGG<br>AGGGGATCTGACAGTTAGTGGTGCCACTGCCACAGCTGGTATCTTCTCCACTTACCCAGCAG<br>ACTACCTGAGTCTATGGGGGGGAGTGGTAGACCAGGTCAGTAACATATAAAAACGGATGTTTT<br>AAATCAATGTGCTTACAGTGTACTTACCCACTAAACTACTGAGGAATTTAAGGTAAGTATATG<br>GGTTAAATTAAGGTTTAAGGATAGGTTACCGTAGGCTACCTAGTTATTACCAGTGTCAATTAC<br>TACAATAAGTACATATTATGTTTCATGCAAAACAGGACTGTAAAATAAAGTGCTACCGACAGAC<br>TGCATAAAAAAAGCTAATATTCCCTCAAACATGATAAAGAATATCAACTTCATGATATTCATAT<br>TTCACCTTGTGTAAAAATTTTGAAAGGAGACTGAGTAGAGGTCCACAATATTTCACTAAGGTC<br>CATCCTTAAGGAGATTTCTGGCCTTGTAAGTGAATTTAGTTAGACATTTGTATTTAACTGTTCAA<br>AACGCAAGACAAGAATTCATAGGTTTGTTAGCTATTCACAACATATATGTACAAGTTTCGTAA<br>TTACCTAATCCTTTATTACGCACAATTATATGCCCATGACGCTGACACTGCTAATTATTACTG<br>ATATCCTGAGATTGGTTTAAACATAAATATAGAGGTAATAAGTTCCAATGCCAGTAAATATTAGC<br>AGAACACTAAGTAATGCATTTCTGTACACCTTTAAAAGGACAATTGTTTCGTTTGAAGTAGCTT<br>GAGTAGATAAATGACCTCAGGAGTCATGACACCAGGATCACACTGACCTCCGTTTGGCTGAA<br>TCAGGAAAAAACTGTTTCAGCTCAGTTTCATGGAATTCCATTTCTGTTTAAAGCTATTGTGGTGG<br>TGGTGACGGTATTCCAGTATGCTTTGCAATTGAATGAGTTCGAACAGGTTTGGGTCCAAATAC<br>ACTGAAGTGAAACGGGTTTGCAAGTGTGTTCTTTGTTACTTAAACGTACAGAATTTTATCAAT<br>GTTATAAAGCTGGTCGTGTATGTGTGTTACCATTGTTGAGATTTCTAGTCCCAGGAGTGTAGT<br>GCACTCTTCAACTTAAAGGCTTTACAATGCCATCAATGGTTCCATGTAGAACATTTAGCATTTC<br>ATGGAACCTTCCATTGCACAAAATGGAATATTTAGATTCTTAAAATGTTCTTTAACCTAATAAT<br>AATAAAAAAAGGTTCTTTTAAGAATTGCTCACTGAAAGGTTCTTTGGGGAACCCAAGATGG<br>TTCTTCTATGGCATTACTGCGAAAACCCACTTTTGGAACCTTTAGTTGGTGACTTGTTGAATG<br>TAGGGGTTTTATGACAAAATAACACCTATACTCTGCTTGAGAAATTGGTGATGTTAGTTTCC<br>TTTACAAAATAACAATAAACGAAAATATTACGTCATTTCATAAAGATTTCTCAAAAAAACTTGT<br>GCTTGTCTGCAGATAATTGGCACAGCCGCTCTTCTAGCATGTGTTCTTGCATTGGGAGACCC<br>TCATAACACACCAGCACCTCCTGGTCTGGAGCCTGTCCTGGTAGGAGCAGTTGTCCTGGTGA<br>TCGGCATTTCATGGGATCTAACAGTGGATATGCCATCAACCCGGCACGAGACATCGGACCA<br>AGACTCTTCTCTTACATTGCAGGCTGGGGAGACGAGGTGTTCAAGTCAGTGTAAACATACACG<br>CAATGTCAAAGGCTTCTGTTTCAGTTAATTATGCACTCACATATTTTCTTTGTTTGTATTATAC<br>TGTATTTTACACCACTGTTCAAAAATTTGGTGTCGGTAACTTTTGTTAATGTTTTTGAAAGTCT<br>CTTATGCTCACATAGGCTGCATTTATTTGATCAAAAATTTCTGTAAAAACAGTAGGCTATGTTCA<br>CACTTAGCGTCTTTTTTGACAAGAAAAAGTTGACAACGGCGGATTTTAGCAAAAAA<br>AAAACGCTGGCAGCGTTCGGTTACAAATAGCAGCCGAGCGCTCTTTGTTGCTATAACAAC |
|--|----------------------------------------------------------------------------------------------------------------------------------------------------------------------------------------------------------------------------------------------------------------------------------------------------------------------------------------------------------------------------------------------------------------------------------------------------------------------------------------------------------------------------------------------------------------------------------------------------------------------------------------------------------------------------------------------------------------------------------------------------------------------------------------------------------------------------------------------------------------------------------------------------------------------------------------------------------------------------------------------------------------------------------------------------------------------------------------------------------------------------------------------------------------------------------------------------------------------------------------------------------------------------------------------------------------------------------------------------------------------------------------------------------------------------------------------------------------------------------------------------------------------------------------------------------------------------------------------------------------------------------------------------------------------------------------------------------------------------------------------------------------------------------------------------------------------------------------------------------------------------------------------------------------------------------------------------------------------------------------------------------------------------------------------------------------------------------------------------------------------------------------------------------------------------------------------------------------------------------------------------------------------------------------------------------------------------------------------------------------------------------------------------------------------------------------|

|  |                                                                                                                                                                                                                                                                                                                                                                                                                                                                                                                                                                                                                                                                                                                                                                                                                                                                                                                                                                                                                                                                                                                                                                                                                                                                                                                                                                                                                                                                                                                                                                                                                                                                                                                                                                                                                                                                                                                                                                                                                                                                                                                                                                                                                                                                                                                                                                                                                                                                                                          |
|--|----------------------------------------------------------------------------------------------------------------------------------------------------------------------------------------------------------------------------------------------------------------------------------------------------------------------------------------------------------------------------------------------------------------------------------------------------------------------------------------------------------------------------------------------------------------------------------------------------------------------------------------------------------------------------------------------------------------------------------------------------------------------------------------------------------------------------------------------------------------------------------------------------------------------------------------------------------------------------------------------------------------------------------------------------------------------------------------------------------------------------------------------------------------------------------------------------------------------------------------------------------------------------------------------------------------------------------------------------------------------------------------------------------------------------------------------------------------------------------------------------------------------------------------------------------------------------------------------------------------------------------------------------------------------------------------------------------------------------------------------------------------------------------------------------------------------------------------------------------------------------------------------------------------------------------------------------------------------------------------------------------------------------------------------------------------------------------------------------------------------------------------------------------------------------------------------------------------------------------------------------------------------------------------------------------------------------------------------------------------------------------------------------------------------------------------------------------------------------------------------------------|
|  | <p> AGCTGCAACAGTAGCCTAGTGCTGTGTGATGCAAAAAATGTCGAGAAAGAGAAAAGTTGGCT<br/> CTTGCGTTGGCTTTTGAAGTTACCGGGGAGGAGAATGTCGGTTCACAAAGACGTTTGTGGGT<br/> GCACGACAGACAGTTGTTCTTGTGTTATGGAAACGACAGGTCTCGCTACTCGCTTGTCAAT<br/> GGTCAGCTGTCAAAAAGGCGCTTGACGTAGGGCGTTCTTTTCAGAAAAGTTGAACTTTTTTC<br/> AACTTAAAAAGACGCTCTGAGCTGCAGAAAAAGACGCCGGCGGTGGCGTCTAAAAAAGCG<br/> CTCAGGACTTTTTGGAAAAAACGTTTACTCCATAGGGTTATAATGTAGAACAGACGCTGGC<br/> AGTTTGAAAAAAGACGCTAAGTGTGAACATAGCCTAATATTGTGAAATAAAAAATGACTGTT<br/> ATCTTTTTTAATATGATTTAACATGTAAATAATTCCTGTGATGGCAAATCAGCAGCAATTATTCC<br/> AGTTTTTCAGTGTCACATGATCATTTAGAAATTATTCCAATATGCCTATTTGGTGCTCAAGAAAC<br/> ATTTCTTATTATTATCAATGTTGAAAACAGTTGTGCAGCTTAATATTTTTGTGGAACTGTGAT<br/> ACATTATTTTCAGGATTTTTTGATAAATAGAAAGTTAAAAAGAACAGCACTATGATAATGTTA<br/> ATTTGTTTAGTTTCGGTGGAATAGATCTGCTATGCTGCTGCTGTTATTGCTGCTGATGCAGAGC<br/> AAGTACGGGACTTGCTAATACATACAAGACATGCTGCTGCTGTACAATATAACATACATTAATT<br/> ACCTGTAGCAGATCTATGATCCCGATCTCATGTGAAAGTGCCTATCTATAGCACGAATGATATT<br/> TCTTGTATCATTTATACGGCAAAAAGAGTTTTTGGCGTACATATGATACGCAGTTTTTCGCGTGCA<br/> TATGATACGCACCTTTATGGCGTGTAATACGCACGCACTCCTCACCCCTAATCCTACCCAAGGG<br/> CTTTACAGTGCGTATCATTTGAACGCAAAATCTCTTTTTGGCGTATAAATTATACGAGAAATAT<br/> CATTCGTGCTATAGATACGCACCTTTCATGAGATCGTGTTGGATCTATACAGGTGGAGCTGGGG<br/> AAGGTGGAGGGTTTCTGAAAGCACTGCTACAGAAAACGCTGACCAAGTATTTGAAAGTTGG<br/> CTGCCATACAGAAGGAACCAATCAGCCGTTCTCTATAAAGAACGATGTGATTGCAAGCCAGT<br/> TGATTTAAAGACCTATCAGTCTGTGCCATCCAGAGTTTCGTGACAGGACTTTGAAAATAGAA<br/> ATAGAAATCTTTTATAATATTATAAATGTCTTTACTGTCACTTTTGAGCAATTTAATGAATTTTT<br/> GCTGGATAAAAGTAATATTATATAGCTTCTTTAAAAAAAAAAAAAAAAATCTTATAGTCCCCAAA<br/> CTTTTGAACAGTGGTGTGTATATATATATTTACAGATAATAAAAAAAAAAACTTTTGGACACTA<br/> ACATGAGACTATTTGTTGTGTCAGGGCCGGACATGGATGGTGGTGGGTACCGTTGGTTGTAACA<br/> TGTGTTGGTGCTCTTCTGGGTTCACTTTTATGAGCTGCTGATTGGAGTACATCATCCAGACT<br/> CAGAGCCAATGGATCCTGAAGGCCTGACAGCGAAAGACCAGCAAACCTCTAGAGTTAGAGGG<br/> AGTGCAGTCCAAGTTTGACACCATTAAGAAAAACGGCAAGGAAAGGATCTTTTCCATAACCT<br/> CAGCGGATATAAGATAAAGGGAAAAGAATCGGTCAAACGCGTGATGGAATCAGATTTTTTAC<br/> TATTTATATGTTAAATGTATAAAAAAATTAAATAAAATTGGAAGCACAATAATTGTCAGGCAA<br/> AGTTTTATGAACTACATGACCTCTACAACATCTTGTCTAGTAATTTAGAATTTTTTTGTAGGTT<br/> TATAATCAAATATATCAACAATGGCGTTGAATCGTGTTTCAGTAAAGAGTACTTTATATTTTCT<br/> TTTGTTAGCAAAAATCTAAATATACTCAATTCCAGTTCTAATAA<br/> </p> <p> ATGGATCGTCTGCTGAGGAGATGCCGAATCAAGAGCAGCTTGGTCAGAGAATGTCTGGCTG<br/> AATTTTTCGGAGTCTATGTTTTGATACTTTTTGGGTGTGGCTCAGTTGCCCAGGTGACGACCT </p> |
|--|----------------------------------------------------------------------------------------------------------------------------------------------------------------------------------------------------------------------------------------------------------------------------------------------------------------------------------------------------------------------------------------------------------------------------------------------------------------------------------------------------------------------------------------------------------------------------------------------------------------------------------------------------------------------------------------------------------------------------------------------------------------------------------------------------------------------------------------------------------------------------------------------------------------------------------------------------------------------------------------------------------------------------------------------------------------------------------------------------------------------------------------------------------------------------------------------------------------------------------------------------------------------------------------------------------------------------------------------------------------------------------------------------------------------------------------------------------------------------------------------------------------------------------------------------------------------------------------------------------------------------------------------------------------------------------------------------------------------------------------------------------------------------------------------------------------------------------------------------------------------------------------------------------------------------------------------------------------------------------------------------------------------------------------------------------------------------------------------------------------------------------------------------------------------------------------------------------------------------------------------------------------------------------------------------------------------------------------------------------------------------------------------------------------------------------------------------------------------------------------------------------|

|                         |                                                                                                                                                                                                                                                                                                                                                                                                                                                                                                                                                                                                                                                                                                                                                                                                                                                                                                                                                                                                                                                                                                                                                                                                                                                                   |
|-------------------------|-------------------------------------------------------------------------------------------------------------------------------------------------------------------------------------------------------------------------------------------------------------------------------------------------------------------------------------------------------------------------------------------------------------------------------------------------------------------------------------------------------------------------------------------------------------------------------------------------------------------------------------------------------------------------------------------------------------------------------------------------------------------------------------------------------------------------------------------------------------------------------------------------------------------------------------------------------------------------------------------------------------------------------------------------------------------------------------------------------------------------------------------------------------------------------------------------------------------------------------------------------------------|
|                         | <p>CTCAAAACACTAAGGGCGACTACCTGTCAATCAACCTCGGATTTGCACTGGGCACCACATTT<br/>GGAATCTACATTGCAAAAGGGGTATCAGGAGCTCACCTGAATCCAGCTGTTTCCCTCAGCCT<br/>GTGTGTCCTGGGCAGATTCTCCTGGACTCGTTTTCCTTTCTATGTGTGGTCACAGCTTTTAGG<br/>AGCATTTCTGGCTGCAGCAACTGTTGCTCTTCAGTATTATGATGCCATAATGGATTTCACTGG<br/>AGGGGATCTGACAGTTAGTGGTGCCACTGCCACAGCTGGTATCTTCTCCACTTACCCAGCAG<br/>ACTACCTGAGTCTATGGGGGGGAGTGGTAGACCAGATAATTGGCACAGCCGCTCTTCTAGCA<br/>TGTGTTCTTGCAATTGGGAGACCCTCATAACACACCAGCACCTCCTGGTCTGGAGCCTGTCCT<br/>GGTAGGAGCAGTTGTCCTGGTGATCGGCATTTCAATGGGATCTAACAGTGGATATGCCATCAA<br/>CCCGGCACGAGACATCGGACCAAGACTCTTCTCTTACATTGCAGGCTGGGGAGACGAGGTG<br/>TTCAGGGCCGGACATGGATGGTGGTGGTACCGTTGGTTGTAAATGTGTTGGTGCTCTTCT<br/>GGGTTCACTACTTTATGAGCTGCTGATTGGAGTACATCATCCAGACTCAGAGCCAATGGATCC<br/>TGAAGGCCTGACAGCGAAAGACCAGCAAACCTCTAGAGTTAGAGGGAGTGCAGTCCAAGTTT<br/>GACACCATTAAAGAAAACGGCAAGGAAAGGATCTTTTCCATAACCTCAGCGGATATAAGATA<br/>A</p> <p>MDRLLRRCRIKSSLVRECLAEFFGVYVLILFGCGSVAQVTTSQNTKGDYLSINLGFALGTTFGIYI<br/>AKGVSGAHLNPAVSLSLCVLGRFSWTRFPFYVWSQLLGAFLAAATVALQYYDAIMDFTGGDLT<br/>VSGATATAGIFSTYPADYLSLWGGVVDQIIGTAALLACVLALGDPHNTAPPGLPEVLVGAVVLVI<br/>GISMGSNSGYAINPARDIGPRLFSYIAGWGDEVFRAGHGWVPLVVTVCVALLGSLLYELLIG<br/>VHHPDSEPM DPEGLTAKDQQTLELEGVQSKFDTIKENGKERIFSITSADIR</p> |
| Lw_Aqp11b<br>(OQ301578) | <p>GGCGGAACCGCTCTACACCAAAGTTTCTTGACAGGATTAGTTTTGAACGATTATTCGTAGCG<br/>AGGCCGTAAGGAGCTGGCAGAGATGGCCTATCTCACCGTCTCTCTGTGCTTACTGGTGGGAA<br/>TTGTAGTTTTTAGCGAGGTGGCGAGAAGGACAGCTTCATATCTATTCCCAAATCTTAACTGGA<br/>TCCCCTATGTTCTGGAGTTTATTTCCACTTTTCAGTTGTGCGCGTGCACGCACGAGTTAAAGC<br/>TGCTCGCGGAGGTGGGCAGACTGGAGCCGCAGATCGGACTGACCCTCACGTACCTCATCTC<br/>GGTGATCCACGTGCTTTCTTTCCACGGTGCGATCTGTAACCCACCGGCTCTCTGGAGCACC<br/>TTCACCGCGGGACTCTACCCGCAGACGCGCATTGGCACAGATCTCATGCCAGCTGATCGCG<br/>GCTGTGGTGGCACGGCTAGTGATGCCTCGCCTGTGGTCACTGGCGCTCTCTGACATGCATGA<br/>ACTGCACACACTGATGGACTTTAAATGCACGAACAGCCCCATTAATGTCCCTCTGCTGCAGG<br/>CCGCCGCGGTGGAGCTGAGCTGCGCGTTTGTATGCACTCTGCGGTGTGCAACCTGGATAAA<br/>GTGGAGGAGAAATACCGGGTTCATGCAATAGCGGCTGTATCACCACCTTTAGTCTATGCGGG<br/>TGTGTGCACGAATCTAAAATTCCACGGTCGTACCATGGTTCAAATATAATAATTTTTCAGGAG<br/>CACCACAGTACTAGGCTATTATGACCAGTGCAAGTGTTTTATTGTCAAATCAAAGTCGTCTG<br/>TCTGTCTGTCTGTCCGTCCGTCCGTCCGTCCGTCTGTCTGTTCTTTCTCATGCAGATTTT<br/>GTCTATTGATATTTAGTATCATTCATATGCTGTAACTGCAGTGCAACTGTGTTTCAGGAAGCT<br/>ACTGTGTTTTGTAAAGGTGGACATCTCACTGGAGCTGTGTTCAACCCAGCACTGGCATTCTC</p>                                                                                                                                                  |

|  |                                                                                                                                                                                                                                                                                                                                                                                                                                                                                                                                                                                                                                                                                                                                                                                                                                                                                                                                                                                                                                                                                                                                                                                                                                                                                                                                                                                                                                                                                                                                                                                                                                                                                                                                                                                                                                                                                                                               |
|--|-------------------------------------------------------------------------------------------------------------------------------------------------------------------------------------------------------------------------------------------------------------------------------------------------------------------------------------------------------------------------------------------------------------------------------------------------------------------------------------------------------------------------------------------------------------------------------------------------------------------------------------------------------------------------------------------------------------------------------------------------------------------------------------------------------------------------------------------------------------------------------------------------------------------------------------------------------------------------------------------------------------------------------------------------------------------------------------------------------------------------------------------------------------------------------------------------------------------------------------------------------------------------------------------------------------------------------------------------------------------------------------------------------------------------------------------------------------------------------------------------------------------------------------------------------------------------------------------------------------------------------------------------------------------------------------------------------------------------------------------------------------------------------------------------------------------------------------------------------------------------------------------------------------------------------|
|  | <p> TATACAGTTCCCCTGTCCTGGAAACACTTTTGCAGAGTACGGTTTTGTGTACTGGATGGGGCC<br/> AATACTAGGTGAGCATGATTACAACATGCACCTTCTTTGACCTTTAAAATCAATGCCAGATTCA<br/> TAAACAAAAAACCTTTTGAGACTGTTGTGTGATCAACTGATGGTTTTATTTGTAGAAAAA<br/> AAAGTGTATCCTGTCAAACACTTCACAAGTAATAACACATAATAAGACAAAACAATAAAATG<br/> TGTTACACTTTACAATAAGGTTTCATTAGTTAACTACGAACAATACTTCAGCATTTATTAATCTT<br/> AGTTCATATTAATTTTCAGCATTTACTAATACATTATTAATAATCAAAGGTTGTATTTGTAAACATT<br/> AGTTAATGCACTCTAAGCTAACTTGAACAAACAATAAAACAACCTGTATTTTTATTAACATAACAT<br/> TAACAAAGATGAAAAAATACTGTGACAAATGTATTGCTCATTGTTAGTTCATGTTAGTTAATA<br/> CATTAACATAATGTTAACTAATGAACCTTATTGTAAAGTGTTACCAAAATGTTTTTAGTGGCAG<br/> AATAAAAAACACATTTGCATGATTCTCATGAAGAAGCTTAACTGGAAGTAGAATAATACTTTC<br/> TAAACGTTTATATACTCCCAAACCAAAACCTACAACACACAGATACAGCCCATGGATGTTCACT<br/> CATATAGTACATTTGTAAATAGCAGCAAGAAATGTACAGTTCTCTGTGTTTCACCAGTATATTC<br/> AGAGGTTTCATGCTGGTTTTCCACTCTTTTTGTGTCTATTACAGGTATGACAGGCTCTCTGCTTC<br/> TTTTTGACAAAGTGATCCCAGCCATTTCAGGAAAAAGCACAAATTCAAAAGCACCCGAACCTCT<br/> AATGGACTCAAGAAGAAAAAGATGAATTAAGACGGTTTTATAAAATATAAATAGTAATTACTC<br/> ATCCATATGTAGGCCTAGTTATATACGGTGTATATACAGGACACTGTAATTTCCAGCTCCTCTT<br/> AAAGTAATAATGAAACTGTTGGGACCATAATGTTCATTTTTAGAAGGGTTTTACTGACATTGC<br/> TTTGAAAATGTCTTAAATGTCTTCTTTTTTTTTTAATGACAACATGCAAATTCATGAAACACAG<br/> TGATTATGTAATGACGCATATCTGCAGGTTTACAGCACATAGTGTGACGAGAAGCAATTGTGA<br/> CCATTACAACTGTTATCTTAACAAATGGGACATTCCTGGAATAAGACACATGGGAAGTATTC<br/> TAACTGTGCTGTTGGGATACTATTTGTGTTTTGTCTACTAGCGATGATTCTTACCTAGTAATA<br/> GGTAAAGGTTACAGTATGAGTAATCTTAAGAATAAAATAAAATCTATATTGCCAATTTACTTTG<br/> TTTACATGCTGAATCTTTATAGTGGTTTTTGAATATTTTACATTTACATTGTGTGATTGTTTTG<br/> TTTGATTTTATGCATGTGAAGCACTTTGAGTTGCATTCTATGTATGAAAAGTGCTAAACAAATA<br/> AATGGTTATTATTATTATTAGTATTATTATTAAGCACAGTTTTGCAGTGCCTTTGGATTAAATAA<br/> CCAGGGTGAACCAGACCAGATATAATGCCACGTCTACAATGTAAAATATGGCATAACACAAA<br/> TTCTGTGTTACAAGAAATTAAATGAAGCAGTAC </p> |
|  | <p> ATGGCCTATCTCACCGTCTCTCTGTGCTTACTGGTGGAATTGTAGTTTTTAGCGAGGTGGCG<br/> AGAAGGACAGCTTCATATCTATTCCCAAATCTTAACTGGATCCCCTATGTTCTGGAGTTTATTT<br/> CCACTTTTCAGTTGTGCGCGTGCACGCACGAGTTAAAGCTGCTCGCGGAGGTGGGCAGACT<br/> GGAGCCGCAGATCGGACTGACCCTCACGTACCTCATCTCGGTGATCCACGTGCTTTCTTTCC<br/> ACGGTGCGATCTGTAACCCCAACGGCTCTCTGGAGCACCTTCACCGCGGGACTCTCACCCGC<br/> AGACGCGCATTTGGCACAGATCTCATGCCAGCTGATCGCGGCTGTGGTGGCACGGCTAGTGAT<br/> GCCTCGCCTGTGGTCACTGGCGCTCTCTGACATGCATGAACTGCACACACTGATGGACTTTA<br/> AATGCACGAACAGCCCCATTAATGTCCCTCTGCTGCAGGCCGCCGCGGTGGAGCTGAGCTGC </p>                                                                                                                                                                                                                                                                                                                                                                                                                                                                                                                                                                                                                                                                                                                                                                                                                                                                                                                                                                                                                                                                                                                                                                                                                                                                                                                                                         |

|                                |                                                                                                                                                                                                                                                                                                                                                                                                                                                                                                                                                                                                                                                                                                                                                                                                                                                                                                                                                                                                                                                                                                                                                                                                                                                                                                                                                                                                                                                                                                                                                                                                                                                                                                                                                                                                                                                                                              |
|--------------------------------|----------------------------------------------------------------------------------------------------------------------------------------------------------------------------------------------------------------------------------------------------------------------------------------------------------------------------------------------------------------------------------------------------------------------------------------------------------------------------------------------------------------------------------------------------------------------------------------------------------------------------------------------------------------------------------------------------------------------------------------------------------------------------------------------------------------------------------------------------------------------------------------------------------------------------------------------------------------------------------------------------------------------------------------------------------------------------------------------------------------------------------------------------------------------------------------------------------------------------------------------------------------------------------------------------------------------------------------------------------------------------------------------------------------------------------------------------------------------------------------------------------------------------------------------------------------------------------------------------------------------------------------------------------------------------------------------------------------------------------------------------------------------------------------------------------------------------------------------------------------------------------------------|
|                                | <p>           GCGTTTGTGTCATGCACTCTGCGGTGTGCGAACCTGGATAAAAGTGGAGGAGAAATACCGGGTTCA<br/>           TGCAATAGCGGCTGTCATCACCCTTTAGTCTATGCGGGTGGACATCTCACTGGAGCTGTGTT<br/>           CAACCCAGCACTGGCATTCTCTATACAGTTCCCCTGTCCTGGAAACACTTTTGCAGAGTACG<br/>           GTTTTGTGTACTGGATGGGGCCAATACTAGGTATGACAGGCTCTCTGCTTCTTTTGGACAAAG<br/>           TGATCCCAGCCATTTAGGAAAAAGCACAAATTCAAAAGCACCCGAACCTCTAATGGACTCAA<br/>           GAAGAAAAAGATGAATTAA         </p> <p>           MAYLTVSLCLLVGIVVFSEVARRTASYLFPNLNWIPYVLEFISTFQLCACTHELKLLAEVGRLEPQ<br/>           IGLTLTYLISVIHVLSFHGAICNPTGSLEHLHRGTLTRRRALAQISCQLIAAVVARLVMPRLWSLAL<br/>           SDMHELHTLMDFKCTNSPINVPLLQAAAVELSCAFVMHSAVSNLDKVEEKYRVHAIAAVITTLV<br/>           YAGGHLTGAVFNPALAFSIQFPCPGNTFAEYGFVYWMGPILGMTGSLLLFDKVIPAISGKSTIQKH<br/>           PNSNGLKKKKMN         </p>                                                                                                                                                                                                                                                                                                                                                                                                                                                                                                                                                                                                                                                                                                                                                                                                                                                                                                                                                                                                                                                     |
| <p>Lw_Aqp12<br/>(OQ301581)</p> | <p>           AAGAACACGGCATCTCCGTGTGCCACGTTATCACATGCTGTAAGCAAATACAGCGTTAGTGA<br/>           GCTCGTGTCTTTCTCTCTGTTCCGGCACAGCTAGCTGTGCACTACACCGTTTGAAACATCATGT<br/>           CAGGGCTTAATGCCTCGCTGGGCTACTTCTTAAGTATAGTAGGTGTGAGTGCAGTGGGAAGG<br/>           GTGATGCTCGCACGATCAAGGCTGCGATGGACTTTCTGATCGAGTTTATCGCCGCATTCGCG<br/>           CTCGCCGCATGTCGACTTGAAGTGGACACCATTGCGGAGGTGCGTCAGTGGGCCGGGGCGC<br/>           TTGGGCCTGACGTGGCCATCACTATGCTTTTCTATCCATCACTATCCACGGCATCATCATGCA<br/>           AGGCGTAAGCGGAAATCCATCGGTGACGTTAATGGGAATCCTCCAGAAAGACATCGGCGCA<br/>           GTGGCAGGCATCCTCAGCGTCGCGGCGCAGTTACTCGGCGCGCACTTCGCACTCGTAGTCGC<br/>           CGGAAAGTACTGGGAAATGGAGCTGACTGACATGCACATGATCAAGAATCTGATGATGTCCG<br/>           AGTGCACTACGTCACTGCGGGTCTCGGCGCTACAGGGAGTGCTAGCCGAAGCCCTCGGCGC<br/>           CGTGACCTTTACCTGGTTTACCTCGTCCTGAAGAGCCGCTCGCAGCTGCTGAGCGTTCCCA<br/>           TATTCTCTCTGCTGCTGACGTTTCATCGCATACGCAGGTGGGTTTGCTGGCGGACAGTTGTGGT<br/>           CTGATGATTACATTTAAAATGCATATATCAAAATTTTTGTGATTTGAAATTCGTCTATTAAATAC<br/>           AAATGCATATGTGACCCTGGACCACAAAACCAGTCTTATGGGTAAATTTTTTAAATTGAGAT<br/>           TTATACATCATCTGAAAGCTGAATAAATAAGCTTTCCATTGATGTGTGGTTTGTATGGATGTA<br/>           TGGTTTGCCGAGATACAACTATTTGAAAATCTGGAATCTGAGGGTGCAAAAAAATCTAAATAT<br/>           TGAGAAAGTCGCCTTTAAAGTTGTCCATTTCTGTTGGCAATTGTGCTGCATTCACCTACAAATT<br/>           TATTTTTTATATATTTACGGTAGGAAATTTACAAAATATCTTCATGGACTATGATCTTTACTTAA<br/>           TATCCTAATGATTTTTGGCATAAAAAGAAAATCGATAATTTTGACCCATAACAATGTTTTGTG<br/>           GCTATTGCCACACATATACCCGTGCGACTTATGACTGGTTTTGTGGTCCAGGGTCACATATTTG<br/>           TAGATTTAAAATGCATATATTAATAAAGATTGTAGAATTTTTAAATGCACATTAAATTAATAA<br/>           TGTGGATTTAAAATGCATATATTAATAAAGATTGTAGATTTAAAATGCACATATTAATAA<br/>           AGATTGTAGATTTAAAATGTATTAATAAAGATTATGTATTTAAAATGCATATGTTACATAAATA         </p> |

|  |                                                                                                                                                                                                                                                                                                                                                                                                                                                                                                                                                                                                                                                                                                                                                                                                                                                                                                                                                                                                                                                                                                                                                                                                                                                                                                                                                                                                                                                                                                                                                                                                                                                                |
|--|----------------------------------------------------------------------------------------------------------------------------------------------------------------------------------------------------------------------------------------------------------------------------------------------------------------------------------------------------------------------------------------------------------------------------------------------------------------------------------------------------------------------------------------------------------------------------------------------------------------------------------------------------------------------------------------------------------------------------------------------------------------------------------------------------------------------------------------------------------------------------------------------------------------------------------------------------------------------------------------------------------------------------------------------------------------------------------------------------------------------------------------------------------------------------------------------------------------------------------------------------------------------------------------------------------------------------------------------------------------------------------------------------------------------------------------------------------------------------------------------------------------------------------------------------------------------------------------------------------------------------------------------------------------|
|  | <p>             TTGTAGATTTAAATACATATTAAAAATTGCCCATTTGAATATGGACTAGATTTCAAATGCATATATT<br/>             AAATGAAAGATTGAGATTGCAAATTCACATATTTTAGATTTCAAATGCATATATAAAATAATGA<br/>             CTGCAATTAATAATGCATATTTTACACAAGGATTGTAAATTTAAATACATATATTAATGGATTG<br/>             CATTTTAAATTTAAATATTGAAGATTACAAATGCATATATTAATATATATACATTTAGATTTCAA<br/>             TGCATATGTTAAATAAGGATTGCATTTGAAAATATTGAAGATTACAAATGCATATATTATATTAA<br/>             AAATTGTAGAATTAATAATTTCAAATGCATAAATCAAATAATGACAGCAATTAATAATGCAAAT<br/>             ATTAATAAGGATTGTATCTTTCAAATGCAAATATTAATAACAGATTTAGAGTGCATATATAAA<br/>             ATAGTAACTGCAATTTAACTGCATAGTTTACAAAAGTATGAAGATATTTAACAAGGATTGTAG<br/>             ATTTCAAATGCATTTATTTATGGGGAGGCTAGCAGAAAATAAATGCATATTTTATAATACACA<br/>             CTAAAGTTTTGTGTTACTCTGGAGAACATCTTGAGGTACAATGGCAATGATTTGGTGGAGTGT<br/>             TATTTTTAATGCCTTCATCCTCACAACTTCTCTCTCACACTAGGAAACAACACACGTCTGG<br/>             ATATGTGAATCCGTCCCTCGCGTATGCGCTAACATTCACCTGTCCTGGACACTCTTTCTTAGC<br/>             GTATTCTCTCGTTTACTGGCTCGGGCCTCTTATTGGTAAGTCCTTGTAATTTTCAGAAATAATA<br/>             CCAAGTATTCAAATAATGCATTCAAACCTTTTTAGTCAATGTGATGAATTTTACTGTTTAAATAC<br/>             TTACACCATGTATTTTCCAGGCATGAGTCTTGCGCTCTTCCTGTATTTGGGAAACATCCCACT<br/>             GCTGTTTCAAGCAGGAATCTACTTTACTCCAAGAAGGCACGTTTCCGGGTGCCCAAAGGAAAA<br/>             ACTTCTGAAGACTGACAGACATAGAAAACAGCACTGATATGGTCTCTTTGTAAACCATACTT<br/>             TACCGTCACAAAACATATTATGGTTAAACCTGTTCAACTGGTTTAAAGTCCCAACAAACCCCTA<br/>             AAGTTACAAAAATCACTGTTTCATCACATCAGATGTCTACTGTAATTTATCCTGTTACACTGAGT<br/>             AAAAATGTTTGTTT           </p> |
|  | <p>             ATGTCAGGGCTTAATGCCTCGCTGGGCTACTTCTTAACTATAGTAGGTGTGAGTGCGGTGGGA<br/>             AGGGTGATGCTCGCACGATCAAGGCTGCGATGGACTTTCCTGATCGAGTTTATCGCCGCATTC<br/>             GCGCTCGCCGCATGTCGACTTGAAGTGGACACCATTTGCGGAGGTTCGGTCAGTGGGCCGGGG<br/>             CGCTTGGGCCTGACGTGGCCATCACTATGCTTTTCCTATCCATCACTATCCACGGCATCATCAT<br/>             GCAAGGCGTAAGCGGAAATCCATCGGTGACGTTAATGGGAATCCTCCAGAAAGACATCGGC<br/>             GCAGTGGCAGGCATCCTCAGCGTCGCGGCGCAGTTACTCGGCGCGCACTTCGCACTCGTAGT<br/>             CGCCGGAAGTACTGGGAAATGGAGCTGACTGACATGCACATGATCAAGAATCTGATGATGT<br/>             CCGAGTGCATACGTCACTGCGGGTCTCGGCGCTACAGGGAGTGCTAGCCGAAGCCCTCGG<br/>             CGCCGTGACCTTTCACCTGGTTTACCTCGTCCTGAAGAGCCGCTCGCAGCTGCTGAGCGTTC<br/>             CCATATTCTCTCTGCTGCTGACGTTTCATCGCATACGCAGGAAACAACTACACGTCTGGATATG<br/>             TGAATCCGTCCCTCGCGTATGCGCTAACATTCACCTGTCCTGGACACTCTTTCTTAGCGTATTC<br/>             TCTCGTTTACTGGCTCGGGCCTCTTATTGGCATGAGTCTTGCGCTCTTCCTGTATTTGGGAAA<br/>             CATCCCACTGCTGTTTCAGCAGGAATCTACTTTACTCCAAGAAGGCACGTTTCCGGGTGCCCA<br/>             AAGGAAAAAATTCTGAAGACTGA           </p>                                                                                                                                                                                                                                                                                                                                                                                                                                                                                                                  |
|  | MSGLNASLGYFLTIVGVS AVGRV MLARSRLRWTF LIEFIAAFALAA CRLEVDTIAE VGQWAGAL                                                                                                                                                                                                                                                                                                                                                                                                                                                                                                                                                                                                                                                                                                                                                                                                                                                                                                                                                                                                                                                                                                                                                                                                                                                                                                                                                                                                                                                                                                                                                                                          |

|                        |                                                                                                                                                                                                                                                                                                                                                                                                                                                                                                                                                                                                                                                                                                                                                                                                                                                                                                                                                                                                                                                                                                                                                                                                                                                                                                                                                                                                                                                                                                                                                                                                                                                                                                                                                                                                                                                                                                                                                                                                                                                                                                                                                                     |
|------------------------|---------------------------------------------------------------------------------------------------------------------------------------------------------------------------------------------------------------------------------------------------------------------------------------------------------------------------------------------------------------------------------------------------------------------------------------------------------------------------------------------------------------------------------------------------------------------------------------------------------------------------------------------------------------------------------------------------------------------------------------------------------------------------------------------------------------------------------------------------------------------------------------------------------------------------------------------------------------------------------------------------------------------------------------------------------------------------------------------------------------------------------------------------------------------------------------------------------------------------------------------------------------------------------------------------------------------------------------------------------------------------------------------------------------------------------------------------------------------------------------------------------------------------------------------------------------------------------------------------------------------------------------------------------------------------------------------------------------------------------------------------------------------------------------------------------------------------------------------------------------------------------------------------------------------------------------------------------------------------------------------------------------------------------------------------------------------------------------------------------------------------------------------------------------------|
|                        | GPDVAITMLFLSITIHGIIMQGVSGNPSVTLMGILQKDIGAVAGILSVAAQLLGAHFALVVAGKYW<br>EMELTDMHMIKNLMMSECTTSLRVSAALQGVLAELGAVTFHLVYLVLKSRSQLLSVPIFSLLLTF<br>IAYAGNNYTSGYVNPSTAYALTFTCPGHSFLAYSLVYWLGPLIGMSLALFLYLGNIPLLSFRNLLY<br>SKKARFRVPKGKTSSE                                                                                                                                                                                                                                                                                                                                                                                                                                                                                                                                                                                                                                                                                                                                                                                                                                                                                                                                                                                                                                                                                                                                                                                                                                                                                                                                                                                                                                                                                                                                                                                                                                                                                                                                                                                                                                                                                                                                   |
| Lw_Aqp14<br>(OQ301579) | ATGATTTACTGGTTACTGATTCATCACAGGTTTAAACGTCAGTTACTTGCAGTTATTTTTGC<br>CCTTTGATTCACACCAGGAGCTGAGGAGCCGTCAGTTTTGGCAGGGGATTCTGGCAGAGCTT<br>CTTGGTTCCCTGATCTTTGTATCTGCTGTGTTGGGCTCTTTAGTGCCGGGGCCGGACGGGGCC<br>TCCCCGGGGCCCATCTACCCCGCACTGGCTGCCGGTATGGCAACTGTGGTTCTGGGATATTGC<br>TTTGGTGAAATCAGTGGGGCTCAGGTAATTAACCTGATTTATTTATTTATTTGTTAACTCAAATT<br>GAAAATCTGGTGGTGTTAACAATGGCATGTCATCTGATTCCCAGAAATCACAAAACCTATAA<br>TAATACCCCATATAATAACCATAAAGTCGGCTCGAAGCAGAAGTTTCGATAGTCTTTTCTTCCC<br>TATTGTGACGTATCTTAGTGAAACGGCTTCTGGAACAAGAGCAAATGTAGGGCGGGACTTGC<br>GTATGGCCATCTGCCGGAATCTAGTTATTTTAGTCAATTAAGTTTTAAATATGGATATTTTTCTT<br>ACACGAACACATCGCTTCACTTCAGCAGGCATTTATTAACCCGCCACAGCCGTGGGGAGCAC<br>TTTAATCATGGATGGATGCGCTTTGATGGACTTCCAAAAAATATACTCACATTCTAAAGCTT<br>GGAGGGGCCTGGACATTTTTTATATATAACTCTGATTATATTCGTCTGAAAGAAGAATGTCATA<br>TACACCTAGGTTGGCTTCAGGGTGAGTAAATCATGGGCTAATTTTCATTTTTGGGTGAACTAT<br>CCCTTTAAGACGCTTAATGTGGTTTAAAGTAAGTGATATTGAAGCCCCAAATTTAGTACACAGC<br>TTATTAATGAAACATACCGTACCTTGTACAGACAAGCAGAAAACGCACAAGGTTTCACATCG<br>AATGTTTCCTCGTTATAAAGAAAATGTTTATAGTAAAACATATCTGCAACATTTATCAAGATCA<br>TGGATAATTGCATGCATGTGTTAATTATTTTGAGACTAAATTCATCCCATAGTAGGCTTTGGTA<br>AGAGCAAGTAAAATAATCTGTGGGATGGGTAATTTAAGTGAAAGTAAGAGTGTCTGTGTTGTT<br>TTTAGGTCAATCCTGCAGTGAAGTGTGGCGCTCTTGGCCACGCGTAAGGTGGATGTGTTACAG<br>GCGCTGGTGTATCTGGTGGCCCAAGTGTGTTGGGGGGGATCCTCGCCACGGGCCTCATGTACCT<br>GTCGCTGCCCCTGAAGTCCACCGCACAGAACTACATCAACAAGGTGCAGAGGCTTTCACCA<br>AATATAGGACATGTTTCAGACCCACATACTGAACCTGTTGGTCCTGAAACAACATTCACATCCA<br>CCAGTCAGACTTTATTGTTAGGCTTTTATTTTTCAACCAGAAATCTCCCACTGATTTTAGGGCT<br>TGTTAACTCTATAAAGCCTACCGTTTCATATTTGATACATGTGTTTCTAAGGCCTCTAGATGAT<br>CAACATGATCACAACTTCTTGACACAACTACTATAAATTATGTTGTCTGGTTTATAGTTTAT<br>TCTTTGTTAGAAAGTAAAAGGCCTTTTAGTATAATTGTAAAAAGCCCCCTTCAGGTCTGTGATA<br>CATGTATGTTTTACAGCTGTGAAATGTTATGACTGATTTTAAAGTAAACATAAGAATACATTTTG<br>TTATTAATATTTCAAGACGAACACTTACTGGAATGAAGCAACTTCGGTTTACTTGATTATTCAA<br>ACATCATTTCTTTAGAAAACCTTAACATTTATCAAATATTGATCCATCAGGCTTTTGAGGGACGT<br>TTATTTGTTTCATCTCTCGATCATATTGTATTGCATTATATGTTTATACCTCCACAGTAAAACT<br>TCAGAGCTTTGATCATACAATAAATGATATATACTGTATATATGCTGTTTATGTAAATATCTT |

|  |                                                                                                                                                                                                                                                                                                                                                                                                                                                                                                                                                                                                                                                                                                                                                                                                                                                                                                                                                                                                                                                                                                                                                                                                                                                                                                                                                                                                                                                                                                                                                                                                                                                                                                                                                                                                                                                                                                                                                                                                                                                                                                                                                                                                                                                                                                                                                                                                                    |
|--|--------------------------------------------------------------------------------------------------------------------------------------------------------------------------------------------------------------------------------------------------------------------------------------------------------------------------------------------------------------------------------------------------------------------------------------------------------------------------------------------------------------------------------------------------------------------------------------------------------------------------------------------------------------------------------------------------------------------------------------------------------------------------------------------------------------------------------------------------------------------------------------------------------------------------------------------------------------------------------------------------------------------------------------------------------------------------------------------------------------------------------------------------------------------------------------------------------------------------------------------------------------------------------------------------------------------------------------------------------------------------------------------------------------------------------------------------------------------------------------------------------------------------------------------------------------------------------------------------------------------------------------------------------------------------------------------------------------------------------------------------------------------------------------------------------------------------------------------------------------------------------------------------------------------------------------------------------------------------------------------------------------------------------------------------------------------------------------------------------------------------------------------------------------------------------------------------------------------------------------------------------------------------------------------------------------------------------------------------------------------------------------------------------------------|
|  | CTAATCTGTAAAAAGATCTCATTGATTTACATTACAAGCTATCAGAATTTTCATCTCTCTTTTTT<br>TGACCATATAAATATCAGCAACTGCAGCAAATTGAATATTTCTGTGAATTTTGGGCCTCTGAAT<br>AATATTATGGTGTATTTTCGTCCCTCAAGTATGAGCTTCATATTATCACTTACCTTAGACCTTAAT<br>CCTGCTCATGCTGTCTAGCATATAAGGCAACGAGAGCTCTCCACTGCGCACGATCAGACACA<br>CGGTCTCAGCTTCCACCCAGCTGATGCCGAATCGCTTCAAGTCATCTTTGAACGTGGACCT<br>CCAGTTGGTCTTGGGTTGTCCACGTCCAAGCTTGGCATCTAGAGGTTCCCAATACATGGCGC<br>GGCTCGTAATCCAGTGCCAGGCCATTTCGAGAACATGGCTGGCCAATCGTAGTCTCTGTTCG<br>GCGATGATGATGCTTAGTCTGTGCATTTTACTCCGTCGGAGGACTTCCACGTTGGTGATGTGG<br>TCTAGATAGCTAATTTCCAAGGATACGTCGTAGACACCGCTGATGAAATACGTCAACCTGACG<br>GATGACGGCCACTCTGACCTTCCACGTCTCGCTGCCATAGGTGACAGTAGGCAGGACGATGG<br>TTGTGTACAGACGCAGTTTGATGGTCAGGCTGATGGTACTCGATGTCCAGATGGGCCGCAGG<br>TGGTAGAACACTGCTGATGCCTTGCCAATGCGACAGATCATATCCGCCTCCGAGACACAGTC<br>ATTTTTATTTAGGCTCCCAAGGTAAGTTAACTGGGTGACATCGTCTTCCAGCTGCTGCTGCAC<br>TAGATGGATCGGGATCATGGTGGGTGTTGGTAGCAAATGGACCTGCATGACCTCGGTCTTATC<br>TCCGCTGATCTTCAACCCAACTTTGCCCCGATTCCCTGTCCAAAGAGGAGGTCATACGTCCAA<br>GGGATTTCCCTCGTCTCCACAAGCAGTGCATATCGTCAGCAAAATCCCGGTCGGTCAGGCGT<br>GATTGGTCAGTCCATGAGATCCCATAACCGTGTCCGTCCATCGCCTTCGCCATGACAAAGTCG<br>ACCACGATCAAGAAGAGGAACGGCGATAGAATGCATCCCTGCCGGACGCCGGTCACGATATT<br>AAAGAAGTCGGTGGTCCCAGTTTCGGTCTTGATCGCGCAACTGGAGTTCAAATATAGGTTCT<br>TGAAAATGGCGATGAATCGTGGTGGGACGCCATACAGGTGAAGAATACACCACAGCGAATC<br>CCGATGGACACTATCAAAGGCCTTCTTGAAGTCGATAAATTTGATGGAAAGGGACCGCTTGA<br>CCTTGATGGACTGCTCAATGATATCACGGAGGGTGAATATCTGCTAACTGCATGACCTTCCTC<br>CTCGAAATCCAGCCTGGTTGTACGCCGGCGTCGATCAACAGCCGCCCGCAGGCGTCGCAG<br>CATGACACTGCAAAGAACTTTCCAGGCACTAAGAGCAAGGTGATGCCTTTCCAGTTCCAC<br>AGTCAGATGGGTTCCCCTTCTTCGGCAGCTTAACAATGACGCCCTTTCGCCAATCATTAGGGA<br>CAGTCTCAGACTGCCAACAGCTGTTGCACGCCTCAACCAGCTTTTGGGCGATCACTGGCCTG<br>CTGTACTTCAAATGCTCTGGGGATATCTTGTCCAGTCCAGCAGTTTACTCCTCTTGAGCGCT<br>TTGATTGCCGCATTGACCTCTGTAGTGGTGATATCGCCGATGTTGACCTCGAGTTCGGGCTGC<br>CCTGGCTCACTGTTGAAATCGTAGGTGGATGTTGGTTCTGACTGGTTCAGGGTTTCTTGAA<br>GTGCTCGATCCAACGGGCGTCTCTGCTCTTCTTTGCTTAGAAGTAGTTTCCCGTGTTTATCCTT<br>GATTGGTATGCTTGAGCTACTTCGAGCTCCAGTCAGCTCACGCACGATGAGATACAGGGTCT<br>TGGTATCGTTCCCATCGGCGGCTTCTGAGCTTCGATGCCTTTGTTCTCCAGCAATTTCTTCTT<br>ATCGGCTCTGCAGCTCCTCTTAACCTCTCGGTCCAATTAAGCGTATCACCGTGCTGCGATGTT<br>CAGCTGATCTTCCGAGCGGGCCTGCTTGTGTCGCTTCTTCGCCTCCTTTTGCTCATCGATGAT<br>AGCTCATGTCCAGTCCTGAATCCACTGCTCTTTACGCCTCCACGCCTTTAGTCGACAATTGC |
|--|--------------------------------------------------------------------------------------------------------------------------------------------------------------------------------------------------------------------------------------------------------------------------------------------------------------------------------------------------------------------------------------------------------------------------------------------------------------------------------------------------------------------------------------------------------------------------------------------------------------------------------------------------------------------------------------------------------------------------------------------------------------------------------------------------------------------------------------------------------------------------------------------------------------------------------------------------------------------------------------------------------------------------------------------------------------------------------------------------------------------------------------------------------------------------------------------------------------------------------------------------------------------------------------------------------------------------------------------------------------------------------------------------------------------------------------------------------------------------------------------------------------------------------------------------------------------------------------------------------------------------------------------------------------------------------------------------------------------------------------------------------------------------------------------------------------------------------------------------------------------------------------------------------------------------------------------------------------------------------------------------------------------------------------------------------------------------------------------------------------------------------------------------------------------------------------------------------------------------------------------------------------------------------------------------------------------------------------------------------------------------------------------------------------------|

|  |                                                                                                                                                                                                                                                                                                                                                                                                                                                                                                                                                                                                                                                                                                                                                                                                                                                                                                                                                                                                                                                                                                                                                                                                                                                                                                                                                                                                                                                                                                                                                                                                                                                                                                                                                                                                                                                                                                                                                                                                                                                                                                                                                                                                                                                                                                                                                                                                                                |
|--|--------------------------------------------------------------------------------------------------------------------------------------------------------------------------------------------------------------------------------------------------------------------------------------------------------------------------------------------------------------------------------------------------------------------------------------------------------------------------------------------------------------------------------------------------------------------------------------------------------------------------------------------------------------------------------------------------------------------------------------------------------------------------------------------------------------------------------------------------------------------------------------------------------------------------------------------------------------------------------------------------------------------------------------------------------------------------------------------------------------------------------------------------------------------------------------------------------------------------------------------------------------------------------------------------------------------------------------------------------------------------------------------------------------------------------------------------------------------------------------------------------------------------------------------------------------------------------------------------------------------------------------------------------------------------------------------------------------------------------------------------------------------------------------------------------------------------------------------------------------------------------------------------------------------------------------------------------------------------------------------------------------------------------------------------------------------------------------------------------------------------------------------------------------------------------------------------------------------------------------------------------------------------------------------------------------------------------------------------------------------------------------------------------------------------------|
|  | CTGTGCAGCCTCTGTGACCACCTGGTTGAAGCTGCCACATTGATCTTCGATATCATCCAGATC<br>CTGCAACGGTTGGAATCGGATATGAATGTGGAGGGTGAATCCGGTGACGACTTGGGGGTTC<br>TTAACTTCTCCACTGCAAATGGGTGTATGGGCTGCGGACGTTTCTGCGGCTTGAGATTCAAC<br>TGGAGGGTCCCTCGCAGCAGGAAATGGTCAGATACAACATCTGCTGCTCGGTACGCACACAT<br>GTCTTGCAACGACTTTCTCCATAGCAAGTTGATGCAGATGTAGTCGATCTCATTAGAGAAGCG<br>ACCTCCAGTTGCCCTCCAGGTTTTCTTGTGAATGGCCTTGTTTTGAAAGATGGTGTGCGCGAC<br>GAAGAGGCCATTAAGACTGCAAAAAAGATGGAATCGCTCGCCGTTGTCATCGGTCTCGTCG<br>GTGGATGAAAAGGGACCAACAATCTACTCTAAGCCTCTTCGATCTCCTCCAAGTAAGGCATT<br>TAAATCTCCAATTAGTAGCTTGAGATCATGGCTGGGAATGGTATTGAAAGTGTCTTGCAGCTG<br>CTCGAAGAAGGCGTCCTTCTCAACATCCGTTGCGGCTTCAGTACACTTGCACAATGGTGTTT<br>TTAACGTGCGGAAAGTGGAATCGAGCGGTGATGATGCGGTCCTGACGGGCTTCCATCCAAT<br>CATGGCCGCAGCAGCCCGCTTGCCGAAGATAAGCCCAACGTCGCGCTCGTGTTTGTCTTCGT<br>GACCCGAGTAGATAACCACCTTGCCGTCGCTGACCATGTGGTCACTACCGGTCCAACGCATC<br>TCGCTGATGCCCAAGACGTCCAACCTGTAGTTGTGCGAACTCCCGCAATAGCTGGGCCAGTCG<br>TCCAGACTGGAATAGGGTCCTGACGTTCCAAGTGCCTATTTCGGGTGATGTTTCTGGTGGAGA<br>AGATCGAATTCCGCATCAGACTCTGGACACCGTTTCCTGTTTGATCCGTCATCGTCATCATAA<br>AATCCGAGTTCCGGCCATTCTTATGTAATGTTTCTTCTCTCGTTGTTTCCGTAGCGGTTAAGGT<br>TTTTTACGGGGGACGGGTGCTACTCCAATGCCCAACCCATTTCGGGAAGCCAGTGCCACCG<br>TTCGCCGAGTGCCAAGAGCCACGTTGCCAGCCGACGCCACATGGAGGAGGTGGATGGAG<br>TTTGTTGGCCCCCCCCCAACAATTTTTTCAAAATGTATTTTTCTATATGTTCAATAAAAAAATA<br>AAAAAAAGATTTTTCTGACTATTGTTTCATAGCCGGTTTTACAGGGTTAATGATTAGGGTAGG<br>GAAGGAGTTGCAACTGTGTTTGTGGAACAAGTATGTTGTTGCAGGACCAACCTCCCATTTT<br>GAATAGAAATTAACAGTCTCTCAAATAACAACATGAGGAGGCCCATTTAGTATGTTGTTGAC<br>ATGAACTTCTAATGTCCTTTCTAAAAGGGCACTTTAACAGATTCTACTACAGGCCTCCCTTA<br>CAAAACACAAGTATACATCATGTTTATTTTTAAGTATGCTAATCAATGTACTAGAAGTATACTT<br>TGTAAGCGTACTGTTTCAAAACGATTAAAATTGACCCACTTTTTAGTGTATAATAGAATACTTT<br>TAAGTATACTTCGAGTGTAACAGTAGAAAACCTTTGAGTACACAACTAGTTTACAACCTACATTG<br>TTTTTTTGTACTGCAACTATACTTCAAGTGAACATATAGATATACTTATAGTTTACTAGTTAAAT<br>ACTTGTAGCACATTTCTTTAGTATATGAAAAATATAGAAAAATATACAATTTAAAAATAAATCA<br>ATATTTTTTAAACAATGCAAGTTTATAAGACAGTATGTAAAGTACACTAAAAAAGTTGCTGCCT<br>TATTTTTATGTACAATCAACCTGGATGTTTAAAGTCATTTAACTTAAATAACATTAAACTGACT<br>TAAAAAATTAGTTGAATCTTGTATAACTTATAAAAAAGTTGACAATTGCTTTTACTCATTTTGA<br>TGAGTTAAAGCAATGTAAAAACATGTGTTGTCATAACTTAACATATCATTTTTTACAGTGTATA<br>TGAAAAAGTATTTAATAGGCAACTCAATCAAAAAGAGTAACTCCTACAAGCCGAGTATACTT<br>AGAATACTTAATTATACTAAGTATATATTAATCAAAAAGATATAGGCCAAATATACTTGGACTTTT |
|--|--------------------------------------------------------------------------------------------------------------------------------------------------------------------------------------------------------------------------------------------------------------------------------------------------------------------------------------------------------------------------------------------------------------------------------------------------------------------------------------------------------------------------------------------------------------------------------------------------------------------------------------------------------------------------------------------------------------------------------------------------------------------------------------------------------------------------------------------------------------------------------------------------------------------------------------------------------------------------------------------------------------------------------------------------------------------------------------------------------------------------------------------------------------------------------------------------------------------------------------------------------------------------------------------------------------------------------------------------------------------------------------------------------------------------------------------------------------------------------------------------------------------------------------------------------------------------------------------------------------------------------------------------------------------------------------------------------------------------------------------------------------------------------------------------------------------------------------------------------------------------------------------------------------------------------------------------------------------------------------------------------------------------------------------------------------------------------------------------------------------------------------------------------------------------------------------------------------------------------------------------------------------------------------------------------------------------------------------------------------------------------------------------------------------------------|

|  |                                                                                                                                                                                                                                                                                                                                                                                                                                                                                                                                                                                                                                                                                                                                                                                                                                                                                                                                                                                                                                                                                                                                                                                                                                                                                                                                                                                                                                                                                                                                                                                                                                                                                                                                                                                                                                                                                                                                                 |
|--|-------------------------------------------------------------------------------------------------------------------------------------------------------------------------------------------------------------------------------------------------------------------------------------------------------------------------------------------------------------------------------------------------------------------------------------------------------------------------------------------------------------------------------------------------------------------------------------------------------------------------------------------------------------------------------------------------------------------------------------------------------------------------------------------------------------------------------------------------------------------------------------------------------------------------------------------------------------------------------------------------------------------------------------------------------------------------------------------------------------------------------------------------------------------------------------------------------------------------------------------------------------------------------------------------------------------------------------------------------------------------------------------------------------------------------------------------------------------------------------------------------------------------------------------------------------------------------------------------------------------------------------------------------------------------------------------------------------------------------------------------------------------------------------------------------------------------------------------------------------------------------------------------------------------------------------------------|
|  | <p>CTGTCAGTATAGTACACTTACATTTAATTTTAAAGTATATTTCTGAGAAGTACATAAAAAAGTCGA<br/> CTGAAAGTACATTATTTTTAGTTTAAAAGAAGTATACTAATAGCACACTTGAATAAAAATTCTTT<br/> TTTGTAAGGGCTGTGTTTAGAAATGTGCTGTTTAAAGATGTTTACTTTCTAGTCCATAGAGAA<br/> TCAACATAAACTCAGTGTTACAAAAACAACTAAAACGTCCGTCATATTTCCCTTCTCGTTCA<br/> GGTCCCAGTGACATGAACGCAGGTCAAGCTCTCGTGATGGAGATGCTTGCCACGTTTGTCC<br/> TGGGCTTCACCGTATTTTCTGTGGAAGATCAACGCAGGAGAGAGAAATAAACGAACCTGGAAA<br/> CTTAGCCATTGGGTTTGCTGTAACCACTGCAATCTTTATTGCTGTAAGAAATTAATAATTTTAT<br/> TCTGCAAGGATGCATTAAATTGACAAAAAATCACAGTAAAGACATTTATAATGTTACAAAAG<br/> ATTTATATTTTTCAAATAAATGCCGTTCTTTTGAACTTTCTATTATCATATAAAATCCTGAATAAA<br/> AAGTATCACAGTTTCACACAAAAATACTGTTTTCAAATTGATCAAAATAATAAATGTTTCTT<br/> GAGTAGCATATTAGAATGATTTCTTAAGGATCATGTGACACTGAAGACTGGAGTAATGATGCT<br/> GAAATCATAGCTTTGATCACAGGAATAAATTACATGTTATATTCCAATAGAAAACACTTATTTT<br/> AAAATGAAATCTTTTTTACAATTTTGCTGTTTTTACTGTATTTTTGATCAATTAATGCAGCC<br/> TTGGTGAGCAGAAGAGACTTCTTTCAAAAAACATAAAAAAATACTGACCCCAAACTTTTGAA<br/> CAGTAGTGTATGTACATCCCTTATGACTTAAACATAACCACTCAAACACTACATGAACACTGTCCA<br/> TTTGACAGCTATTTTTAATGATTATTTTATGAATAATTATCCCATTTGTGCTGTCCTCCCTCTGC<br/> ATGTTTTATTGTAAATACACATAATAATTGTTATTTTTAAATGCATGTGTGTGGATTTTCAGGGGA<br/> GGTTTTCTGGTGCCAGCTTGAATCCGGCTCGCTCCCTTGGTCCCGCTATAATACTTGGATATTG<br/> GGAACACCACTGGGTAAGTTAAACAGCTTTTTCAAGCAGCTCTGTTGCCTAGTTAGTACTAA<br/> TTAATACAAACGGAAATTACACAGTTCCGCAATTAACATCTAGAAAACCTTTTTCTTACAAAAA<br/> AAGTTGTGGATTTTGTGTTGCTTTTGGAGCAAGTAGGAAAGTAAAAGCAATATTTGTCTCCA<br/> CATACTTCTATAGACGTGTCCCCTGCTGTTGTTCACTTCTGCAGTCCAATCTCTGAAATTGCAT<br/> TGCTAGAACACAAATAGGGAGATGAATAGGTAAATTTATGTTTTTACCCTTTAAAAATAAAA<br/> AGGCGATTTATCTGCTTCCTCTTGTGTTTCAAGTGTACTGGATCGGGCCAATATTAGGTGCAGT<br/> CCTGGCTGGACTATCCCACGAGTTTATTTTCGCCCCCAGTGCGTCCAGACAGAAAGCTGGTGG<br/> CTTGCTTGACCTGTAAGGACATTGAGATCGTGAGACGGCCAGCGTGTCTCGATCATCCCTG<br/> TCCACCGTCACACAGAGCGCCATGAGAAACAAGCAAAGCAATAAACTGGAGCACAGCTAA</p> |
|  | <p>ATGATTTACTGGTTACTGATTCATCACAGGTTTAAACGTCAGTTACTTGCAGTTATTTTTGCCCT<br/> TTGATTCACACCAGGAGCTGAGGAGCCGTCAGTTTTGGCAGGGGATTCTGGCAGAGCTTCTT<br/> GGTTCCCTGATCTTTGTATCTGCTGTGTTGGGCTCTTTAGTGCCGGGGCCGGACGGGGCCTCC<br/> CCGGGGCCCATCTACCCCGCACTGGCTGCCGGTATGGCAACTGTGGTTCTGGGATATTGCTTT<br/> GGTGAATCAGTGGGGCTCAGGTCAATCCTGCAGTGAAGTGTGGCGCTCTTGGCCACGCGTA<br/> AGGTGGATGTGTTTCAAGGCGCTGGTGTATCTGGTGGCCAGTGTTTGGGGGGGATCCTCGCC<br/> ACGGGCCTCATGTACCTGTCGCTGCCCTGAAGTCCACCGCACAGAACTACATCAACAAGGT<br/> CCCAGTGGACATGAACGCAGGTCAAGCTCTCGTGATGGAGATGCTTGCCACGTTTGTCTCGG</p>                                                                                                                                                                                                                                                                                                                                                                                                                                                                                                                                                                                                                                                                                                                                                                                                                                                                                                                                                                                                                                                                                                                                                                                                                                                                                                                                                                            |

|                        |                                                                                                                                                                                                                                                                                                                                                                                                                                                                                                                                                                                                                                                                                                                                                                                                                                                                                                                                                                                                                                                                                                                                                                                                                                                                                                                                                                                                                                                                                                                                                                                                                                     |
|------------------------|-------------------------------------------------------------------------------------------------------------------------------------------------------------------------------------------------------------------------------------------------------------------------------------------------------------------------------------------------------------------------------------------------------------------------------------------------------------------------------------------------------------------------------------------------------------------------------------------------------------------------------------------------------------------------------------------------------------------------------------------------------------------------------------------------------------------------------------------------------------------------------------------------------------------------------------------------------------------------------------------------------------------------------------------------------------------------------------------------------------------------------------------------------------------------------------------------------------------------------------------------------------------------------------------------------------------------------------------------------------------------------------------------------------------------------------------------------------------------------------------------------------------------------------------------------------------------------------------------------------------------------------|
|                        | <p>GCTTCACCGTATTTTCTGTGGAAGATCAACGCAGGAGAGAAAATAAACGAACCTGGAAACTTA<br/>GCCATTGGGTTTGTCTGTAACCACTGCAATCTTTATTGCTGGGAGGTTTTCTGGTGCCAGCTTG<br/>AATCCGGCTCGTCCCTTGGTCCCGCTATAATACTTGGATATTGGGAACCACTGGGTGTAC<br/>TGGATCGGGCCAATATTAGGTGCAGTCCTGGCTGGACTATCCCACGAGTTTATTTTCGCCCC<br/>AGTGCGTCCAGACAGAAGCTGGTGGCTTGCTTGACCTGTAAGGACATTGAGATCGTGGAGA<br/>CGGCCAGCGTGTCTCGATCATCCCTGTCCACCGTCACACAGAGCGCCATGAGAAACAAGCA<br/>AAGCAATAAACTGGAGCACAGCTAA</p>                                                                                                                                                                                                                                                                                                                                                                                                                                                                                                                                                                                                                                                                                                                                                                                                                                                                                                                                                                                                                                                                                                                                                                                   |
|                        | <p>MIYWLLIHRFNVSYLQLFLPFDHQELRSRQFWQGILAEELGSLIFVSAVLGSLVPGPDGASPGP<br/>IYPALAAGMATVVLGYCFGEISGAQVNPVAVTVALLATRKVDVFRALVYLVAQCLGGILATGLMY<br/>LSLPLKSTAQNYINKVPVDMNAGQALVMEMLATFVLGFTVFSVEDQRRREINEPGNLAIGFAVT<br/>TAIFIAGRFSGASLNPASRLGPAIILGYWEHHWVYWIGPILGAVLAGLSHEFIFAPSASRQKLVA<br/>TCKDIEIVETASVSRSSLSTVTQSAMRNKQSNKLEHS</p>                                                                                                                                                                                                                                                                                                                                                                                                                                                                                                                                                                                                                                                                                                                                                                                                                                                                                                                                                                                                                                                                                                                                                                                                                                                                                                  |
| Lw_Aqp15<br>(OQ301590) | <p>ATGTCCTGGGACTCCATTACAGACGAACCCCTTCCGACGCTGGACTCTTCTCCGGCATGCTC<br/>GACCGACCACTGCATGTTTCTTTTGCCTTCGGAGTATCGCTAACCCCTGGCCCGTGTCTGCCT<br/>CGGTGAGGTTACCTCAACCCAGTGGTTACCCTGGCATTGGTCACAGGCTTAAGGGTGAGTC<br/>CCTGGCGGGCTGTCCTGTTGGTGGGAACCCAGCTGCTTGGTGGCCTCAGTGCCTGTGCTTTG<br/>CTGTTAGGCACTACACCGATTGCCCTAAGGAGCAACCTGGGGGTTACTGAGGTGAGAGGTTT<br/>CTGATCCTACAGGTTTCTCCTAGGTTATAGGTCTATAAGATTTCGCTAATATTAATCTCTGTGTCC<br/>TGGATATTCTGGTTTCTGTATCTTCTGATGTCTTTGTTCTGAATCGTCTGATTTCTGTAATTCT<br/>GATATCTGCGCTCTGTATCTTCTGATATCTGGATTCTGGATTGTCTGATTTCAATTTTCTGAT<br/>ATCTTTGTTCTGGATCGTCTGCTTTCTGTATCTTCTGATGTCTTTTCTCTATCGTCTGATGTATAT<br/>ATTTTTCTGATGTCTTTGTTCTGCATCTTCTGATGTCTTTGTTCTGTAGATCATCTTATCTCTGT<br/>GTTTCGGATCCTCTGATTTTCGTCATCTGGATCTTCTAATCTCTGTGTTCAACTTTGTCAGAATC<br/>AAAATGAAATGTAGCTTAATGAACTGCCATTTGGTTTCATTGGAGACCTGTGAAAATCTCGA<br/>AGAAACCAATTTAGATTTATCTAAAACATTTCTGTGTCTATAGTTAATGCGCTTGCTCGATAAA<br/>ATTAGGGCTTTTATTACCAATTATAATGTAACTCTGGGTAATTGCCAAGCTATTAAGCCATTCT<br/>CATTTATTCCACAATCTAATTGAATGATTACTTGCAAATTATTTTAATTTCAATTGTGACATGCA<br/>AAGTGTATACTTTTAATTCTCTAATTAGCTAATTCTGCTTTCAATTTTGATTAACTGATGG<br/>TTGTAAATGAAGAAAATACATAATGAATAAATGTAATAGTACAGGGTAGAAATGTAAGAAACC<br/>ATATTATATTCTGTACTGTTCCCTGTTTCAGCATGAAATTACATCTCAGTGTCTTATCAAAGTGG<br/>AACACTACATTTTCTTCTGAATTCTCTTTTTTGTGTTCTTTTTTGGTACAATACAGATCTGTCAA<br/>AAAGTTTGTAAATAGTAAACATAAATACAGATGCATCATAATAGAAAGACAGGTTGGGTAATCA<br/>CTGAGAAGGAAATGGCAAGAAATTATCAAAATGAATGAGCAAGGGAAAAGTGGTCTGTGTG<br/>TATCAGAGAAAGTGAGGAAAAGCAATATGAGTTTGTAGTTTGTACGTAATTGGAGTGAAAG<br/>AGGAAAGGAGTTGAGTCAGTCTGAAAAGACAGATAGTGTCCAACAATAACAGATAAACTC</p> |

|  |                                                                                                                                                                                                                                                                                                                                                                                                                                                                                                                                                                                                                                                                                                                                                                                                                                                                                                                                                                                                                                                                                                                                                                                                                                                                                                                                                                                                                                                                                                                                                                                                                                                                                                                                                                                                                                                                                                                                                                                                                                                                                                                                                                                                                                                                                                                                                                                                                                          |
|--|------------------------------------------------------------------------------------------------------------------------------------------------------------------------------------------------------------------------------------------------------------------------------------------------------------------------------------------------------------------------------------------------------------------------------------------------------------------------------------------------------------------------------------------------------------------------------------------------------------------------------------------------------------------------------------------------------------------------------------------------------------------------------------------------------------------------------------------------------------------------------------------------------------------------------------------------------------------------------------------------------------------------------------------------------------------------------------------------------------------------------------------------------------------------------------------------------------------------------------------------------------------------------------------------------------------------------------------------------------------------------------------------------------------------------------------------------------------------------------------------------------------------------------------------------------------------------------------------------------------------------------------------------------------------------------------------------------------------------------------------------------------------------------------------------------------------------------------------------------------------------------------------------------------------------------------------------------------------------------------------------------------------------------------------------------------------------------------------------------------------------------------------------------------------------------------------------------------------------------------------------------------------------------------------------------------------------------------------------------------------------------------------------------------------------------------|
|  | CACTTACCCCTCCTTCAGGTGGCCCCGGGGGTATATCTGTATCAGGCTGTGTTAGTGGAGATGG<br>CTGTTACATTCCAGCTAGTGCTGTGTGTCCAGGCTGCCACTCATCCCAAATCAGCATTTTCCT<br>CTGTGGCCCCCTGCAGTCATTGGCCTGTCTGGTCACCCCTTGGTCATCTCATGGCGGTAAGGATG<br>ACAGATGAGAAAACCTTCAGACTTTATTTAAAGTTTTGAATAAAACTGAAACTCACGTTTCATG<br>ATTCAAACCTTTCAAGTGAAGTGAATGCTCACTGGTGCACAAGAAAACAGTGGTCAAGTCAT<br>AATTCTTGTTTTTTGATTAAAAATATCCTTTAAATTGAGTGTATATTTAGTTTGTACCGTATCTGT<br>TCAGTTCTGGTTTTGTTTTCACTGTGTTCTGTCCCTGTTTTGCCTGCCTGCATGTGTTACCTAG<br>TTAGTTTCATTGGTTGTTAATTAGTTCCACACACTTGTTCCTGTTTCAGTTGAATATCCTCCCTG<br>TGTATTTGAGCCTTATTTAAGAGTTCTTTCTGTTCTTGATTTCGGTATCGTTTATTTTAGACTTGG<br>TTGTTTCCTGAGCATCATTTTCCTGTGATTCTCCTACATGTTTCCTTGTGAATTTATTAAAGGAC<br>TCTTTGTGTGATCTCCTTTGTGAATAGCCGCTTTTCCACTGTCGGGCTCGGGCCAGTGCAGG<br>TAGGGCTAACAACGTGCCGTGCAGGGCCAATAGCCTTGGGCCTCAAGCACCGGGGCCAAAA<br>TCAAGTTGCGTTTCCACTGTAGGGCCAGTAGCCCTCCTGCACTTCCCTAAAACCTGCCCTCA<br>ACACGCCTCCATAGAACAATGTCACACAACCTCCACCATTTACCAGCTGACTGAAAATAGCT<br>AGATCGCAAAATGAGCATGACAGAAGCGAACGTTTGGTCTTTACTTGAAGAATTAAGATTCC<br>AGCATCGATATTTGAACAATGCTTTACAATAAAACATTTTACAGTGACAGTAAATTATTCATTT<br>GTGTCAGGAGTGCGCATCAATCACGCTGAATCAAACCTGGTATTTACCATTTACATAAGAAG<br>AGAACACACGGTTGAACCTGTTTCCATTTTATTGCGATCACTGGAATGCCCAACTCCACTAA<br>GACTTTTAAGTCCAAAGGCTTACACATTTAGAAGAATGTTGATAAAATATCATGTTTTCATCAT<br>ATTTCTTAAGAAAGAGTGAACATTTCTATACATTTCCATGAAATTATGCGATCTGAGGAGGT<br>TTGAGCGATCTCTCCCCTCTCACTATACTGTTATCCTTTCAGAGAGAGCTCATGAAAAAGTTA<br>TGAAAACAGGAGTTATGAGTTATACGAGTTAACCGGAGTGCATGTTATTTTATGACATATGCG<br>GATGCATTAGTACGGTATTAACAAAGGCACAGGGAAGAGACAGATAAAACATAAAATCAAAT<br>AAATACATCATATAATAATCATATATGATTTGTCTACATTCTTCAAGCAGTCTCTGGTATTTTCC<br>ATAAACATAATGTATTTATTATCGCAATGGTTAGCATAAGTAGCCTTTAGCATCGCAAAAGGCA<br>TAAATTTATGCCTCATAACAGTGATCAGAATCCCCATCAGATCGCAAGGAAGTTATTTCAAACA<br>CTCGCTGGTGTCTGAAAGTGAGTTTTGAGCTGAAAATTATTTTAAATGTCTTGAATGTTGAAG<br>TTAGCTGGCAGCCTGAAAGCTGGTAGAATAACATGGGAAATGAGCAGCGGTGTTGAACATCT<br>CCTGACTCAAGTAAACTCCGCCTTTGTCCATTACCATTGCGCAAGTCCCAGTTGCCCCGCTTT<br>GGACAAAGGTATCCGATGGGCCAAAGAACCTAGGTCGTTGGCCCAGAGGAAGCCCAGATGA<br>GGCCCAATCAAACCCCGAGAAGTGACAGAGTAAACACGACTGGCCCTGGCACATACTAGCAT<br>GCTCGCTTTGGCCCCGACAGTGGAACATGACGCTTACTACAGCCAATAAACTGTGACAGAA<br>GACCAAACCTCATAACGAGTAGTATTTAAGGATTGACTTATTGGCCGTCCAGCTACTCTGCA<br>TGGAGCAGGAACAGCAAACCTCTCGAGGACCACACCAGGAAATTTCTTCAACTGCTGCGCTT<br>AATGGATTTTCCTGAACACAAACTGTGCGTATTTTTTCATAACCAGCTTAAACGAATGCTGCCT |
|--|------------------------------------------------------------------------------------------------------------------------------------------------------------------------------------------------------------------------------------------------------------------------------------------------------------------------------------------------------------------------------------------------------------------------------------------------------------------------------------------------------------------------------------------------------------------------------------------------------------------------------------------------------------------------------------------------------------------------------------------------------------------------------------------------------------------------------------------------------------------------------------------------------------------------------------------------------------------------------------------------------------------------------------------------------------------------------------------------------------------------------------------------------------------------------------------------------------------------------------------------------------------------------------------------------------------------------------------------------------------------------------------------------------------------------------------------------------------------------------------------------------------------------------------------------------------------------------------------------------------------------------------------------------------------------------------------------------------------------------------------------------------------------------------------------------------------------------------------------------------------------------------------------------------------------------------------------------------------------------------------------------------------------------------------------------------------------------------------------------------------------------------------------------------------------------------------------------------------------------------------------------------------------------------------------------------------------------------------------------------------------------------------------------------------------------------|

GGTGTGGTCTCTGACGACATTTACCGAATTTGTGGAGTGGGTGCTGGTGAACCTGCGGGT  
CCCCCTTACCATTCTGCCAGGAAAGGAGGACGTACCCAGCCCCGCTCCAGAGCCCTGCCAG  
CCGCCTCCACGCCTAGCATAGAGCTAACGCCAAGCCTGCCACGATGACAGAGCCAGACA  
AGAGGACTGAGCAAACCATCGCCCCGGAGCTCTAGTCCCACAGAGTGTGAGAGCCAGAAA  
CATTGTGCATCGCCGTGGGACTGCTTGTGGCAGGGCCGGCCCGAGGCATAAGCGAACTAAG  
CGGCTGCTTGGGGCCCTCTGGCCACCAATCAAATATGTATTTTTTTTTTACATATTAATTA  
TAAACAAGTGACATAAATGAAAAAATGAATGAATTCAGACAATAAAATTCAGATTTTCATGA  
TCAATATACCTGCCTACAAGCTGTGTCTACCAGTGTGTGAGTCATGCGCATAAACTAGACACC  
ATGCGTGCATAGACAATTTGTGCGCACGGTCACGGTAATGTTAAGCCATGTCACAAAAATTG  
TATTTGATCAATGATTGATGATTGACATTTAAATCAATGATTTATCCTTTAAATTTAATGATATTC  
AGAACAGAACAAGAATACAAAAATAACTATAAAACAAGCCAAAAATAAAATAATTTAAAGCGA  
AAGTGAAAGTAAGCGGCGTTCATGTAACCTCTCTCATTAGAATCAAATGCTTCAACATTCGC  
GATGTATTTGGTTGGTAAACTATTCTTTATAGGCTTCTTTGTAATTCACCTCAGTTCCAATATCA  
ACGGAATAAATCATCCTCTTCACATGCGCAAAAAATGTGCTTGGAACATCACAGTGAAGCG  
GTGCTTAGGCCTACGCTGAATGGTACGAATTGTACTACTGACTATTTAAACAGAGCAAGTGTA  
ATTTTTATATGTTAGGTTGACTATTTTATTATTATTTTTTAATACGGCTATAATGAACAGGCTTTG  
ATGTCAAGATTGCAATGCTGGAATATGTTGTGTGTGTGTGTGTGTGTGTGTGTGTGTGTGTGT  
GTGTGTGTGTGTGTGGCGCGGGCGCGATCGAACAGTGGAACATAAAAAACATACTCAGTCAT  
GTTCATACAAGACATCATTCAAACCTGCAAAGTGTTGCAAAACGTTGGAGGATATTTTGCAA  
TAATTTATTTAATATGTTTTGTGACGTTTTGTTTTCAGAAAGTTTAAAAGAGTTAGTAAAAGAGT  
AAAGAAAAAGTTAAACCTTTATTTAAGTAGGCTATCTATTATTTTTTTTTTATTAAGTATTTGTTTT  
GTATTAATAAAACCTCATTGTATTAATTTATAATGTAACATTATAGCATGACATTTGTGTCAATA  
ATCGTCAAGCACAGGTGACTCCGTGTGGTGGGAGGGGGGCCCCCAAATCAAATTCCTGCTTAG  
AGTCCCCAAAAGGCTCAGCCCGGCACTGGCTTGTGGAATACAAGGTGGATCTCAGCTCCAC  
GTTTCCTGTGTCTCTGCTTGTCCCTGCTGGTCCCATCAAGCTCCAAATAACCCTCCCTGTGTA  
TTTAAGCACCGAGTCTTTCTGTTCTGTGTTCTCGGTCTCGTTTTCTGTTACACGTAGTTGTTTCCT  
GAGCTTTATTTCTGTGATTCTCCTACGTGTTCTTGTTTTTATTTTATTTCTGATTTCTTGAAAT  
GGCATGTAATTCAAGTCGATGAACAGCTGAACATACTTGGCTGCATTATTATTATTTTTTCTAA  
AACACAAATGAACTGCTTGTGTGCCCCAAAATAAAATAGGGAGAGATTTGGCAAGAAGTTTGA  
ATTTGGCAGGAGACCCATACAGTAGTTGTCCTGTGTATTTTGATCTGCAGATCGGCTTCACAG  
GTTGTGGAATGAATCCTGCAAGGTCAATTTGGTCCAGCTGTGCTTACATTGAACTTCCACAATC  
ACTGGGTGAGTAAACAAATCTTGTGTGATGAAAAACAAATCATAGATAGACAGATAAAAAATA  
TCAACTAAATAATTTTACAAGTCAATGAAGTATTTATTTTGTATGAACAACTGACTGAAGTA  
ACATGCTCATGTCTCACCTGGCCTTGTGCAGGTGTATTGGCTGGGGCCTTGTGCTGGTTCTCT  
CCTTGCCTGGTTAGTGCATGATCTGGTGCTCCATCCTCGTTGGAGCTGCCTTGGCGACTGGGT

|  |                                                                                                                                                                                                                                                                                                                                                                                                                                                                                                                                                                                                                                                                                                                                                                                                            |
|--|------------------------------------------------------------------------------------------------------------------------------------------------------------------------------------------------------------------------------------------------------------------------------------------------------------------------------------------------------------------------------------------------------------------------------------------------------------------------------------------------------------------------------------------------------------------------------------------------------------------------------------------------------------------------------------------------------------------------------------------------------------------------------------------------------------|
|  | GACAGAATGTAAGGTGCTCTGGAAAGATCTTTCAAAGCAGCCCAGAGGTCCTGAAAACAAT<br>ATGGAAGGGAACAATATGGAATTATCAGAAATCTAA                                                                                                                                                                                                                                                                                                                                                                                                                                                                                                                                                                                                                                                                                                      |
|  | ATGTCCTGGGACTCCATTACAGACGAACCCCTTCCGACGCTGGACTCTTCTCCGGCATGCTC<br>GACCGACCCACTGCATGTTTCTTTTGCCCTTCGGAGTATCGCTAACCCCTGGCCCGTGTCTGCCT<br>CGGTGAGGTTACCTCAACCCAGTGGTTACCCTGGCATTGGTACAGGCTTAAGGGTGAGTC<br>CCTGGCGGGCTGTCCTGTTGGTGGGAACCCAGCTGCTTGGTGCCCTCAGTGCCTGTGCTTTG<br>CTGTTAGGCACTACACCGATTGCCCTAAGGAGCAACCTGGGGGTTACTGAGGTGGCCCCG<br>GGGTATATCTGTATCAGGCTGTGTTAGTGGAGATGGCTGTTACATTCCAGCTAGTGCTGTGTG<br>TCCAGGCTGCCACTCATCCCAAATCAGCATTTTCCTCTGTGGCCCCTGCAGTCATTGGCCTGT<br>CGGTCACCCTTGGTCATCTCATGGCGATCGGCTTCACAGGTTGTGGAATGAATCCTGCAAGG<br>TCATTTGGTCCAGCTGTGCTTACATTGAACTTCCACAATCACTGGGTGTATTGGCTGGGGCCT<br>TGTGCTGGTTCTCTCCTTGCCTGGTTAGTGCATGATCTGGTGCTCCATCCTCGTTGGAGCTGC<br>CTTGGCGACTGGGTGACAGAATGTAAGGTGCTCTGGAAAGATCTTTCAAAGCAGCCCAGAG<br>GTCCTGAAAACAATATGGAAGGGAACAATATGGAATTATCAGAAATCTAA |
|  | MSWDSITDEPLPTLDSSPACSTDPLHVSFAFGVSLTLARVCLGEVHLNPVVTALVTGLRVSPWR<br>AVLLVGTQLLGALSACALLLGTTPIALRSNLGVTEVAPGVYLYQAVLVEMAVTFQLVLCVQAAT<br>HPKSAFSSVAPAVIGLSVTLGHLMAIGFTGCGMNPARSFGPAVLTLNFHNHWVYWLGPCAGSLL<br>AWLVHDLVLHPRWSCLGDWVTECKVLWKDLSKQPRGPENNMEGNNMELSEI                                                                                                                                                                                                                                                                                                                                                                                                                                                                                                                                            |
